# Supplementary material for: In-Hospital and One-Year Outcomes of Patients after Early and Late Resuscitated Cardiac Arrest Complicating Acute Myocardial Infarction—Data from a Nationwide Database
Source: MDPI journal article supplement (doi:10.3390/jcm11030609), 2022-01-26
Supplement: s1 [file s1]

## **Supplementary Material**

**Supplementary Table S1.** Baseline clinical characteristics of patients without cardiac arrest and with ErCA and LrCA in the whole cohort of patients with acute myocardial infarction.

| Variable                                    | Non-CA<br>N=164057 | rCA<br>N=3564 | P value | ErCA<br>N=3100 | LrCA<br>N=464 | P value |
|---------------------------------------------|--------------------|---------------|---------|----------------|---------------|---------|
| Age ≥ 65 years                              | 87880 (53.57%)     | 1910 (53.59%) | 0.97695 | 1567 (50.6%)   | 343 (73.9%)   | <0.0001 |
| Age ≥ 75 years                              | 47236 (28.79%)     | 1071 (30.05%) | 0.10094 | 844 (27.2%)    | 227 (48.9%)   | <0.0001 |
| Age ≥ 85 years                              | 9179 (5.6%)        | 235 (6.59%)   | 0.01041 | 175 (5.7%)     | 60 (12.9%)    | <0.0001 |
| Male gender                                 | 104179 (63.6%)     | 2326 (65.34%) | 0.03264 | 2049 (66.2%)   | 277 (59.7%)   | 0.0062  |
| From home admission                         | 93941 (57.3%)      | 2252 (63.22%) | <0.0001 | 1960 (63.3%)   | 292 (62.9%)   | 0.89    |
| Transfer from other hospital                | 70013 (42.7%)      | 1310 (36.78%) | <0.0001 | 1138 (36.7%)   | 172 (37.1%)   | 0.89    |
| Hipercholesterolemia                        | 67362 (41.06%)     | 1242 (34.85%) | <0.0001 | 1079 (34.8%)   | 163 (35.1%)   | 0.89    |
| Hypertension                                | 118610 (72.3%)     | 2247 (63.05%) | <0.0001 | 1918 (61.9%)   | 329 (70.9%)   | 0.0002  |
| Obesity                                     | 33764 (20.58%)     | 721 (20.23%)  | 0.60851 | 617 (19.9%)    | 104 (22.4%)   | 0.21    |
| Diabetes mellitus                           | 42119 (26.47%)     | 900 (26.12%)  | 0.65383 | 719 (24.1%)    | 181 (39.8%)   | <0.0001 |
| Smoking (current or past)                   | 96191 (58.63%)     | 2142 (60.1%)  | 0.07823 | 1900 (61.3%)   | 242 (52.2%)   | 0.0002  |
| Current smoking                             | 47571 (29%)        | 1078 (30.25%) | 0.10374 | 993 (32%)      | 85 (18.3%)    | <0.0001 |
| Ischemic heart disease diagnosed before AMI | 23693 (14.44%)     | 667 (18.71%)  | 0.62379 | 562 (18.1%)    | 105 (22.6%)   | 0.20    |
| Family history of CAD                       | 18289 (11.15%)     | 388 (10.89%)  | <0.0001 | 331 (10.7%)    | 57 (12.3%)    | 0.30    |
| History of heart failure                    | 13436 (8.19%)      | 418 (11.73%)  | <0.0001 | 319 (10.3%)    | 99 (21.3%)    | <0.0001 |
| History of stroke                           | 6497 (3.96%)       | 205 (5.75%)   | <0.0001 | 170 (5.5%)     | 35 (7.5%)     | 0.076   |
| Chronic kidney disease                      | 10871 (6.63%)      | 383 (10.75%)  | <0.0001 | 281 (9.1%)     | 102 (22%)     | <0.0001 |
| Peripheral artery disease                   | 7927 (4.83%)       | 234 (6.57%)   | <0.0001 | 189 (6.1%)     | 45 (9.7%)     | 0.0035  |
| Chronic obstructive pulmonary disease       | 6674 (4.07%)       | 201 (5.64%)   | <0.0001 | 160 (5.2%)     | 41 (8.8%)     | 0.0014  |
| Prior myocardial infarction                 | 29184 (17.79%)     | 727 (20.4%)   | 0.00006 | 619 (20%)      | 108 (23.3%)   | 0.099   |
| Prior PCI                                   | 20749 (12.65%)     | 428 (12.01%)  | 0.25638 | 370 (11.9%)    | 58 (12.5%)    | 0.73    |
| Prior CABG                                  | 5348 (3.26%)       | 119 (3.34%)   | 0.79254 | 99 (3.2%)      | 20 (4.3%)     | 0.21    |
| NSTEMI                                      | 86909 (52.97%)     | 1208 (33.89%) | <0.0001 | 1011 (32.6%)   | 197 (42.5%)   | <0.0001 |
| STEMI                                       | 77148 (47.03%)     | 2356 (66.11%) | <0.0001 | 2089 (67.4%)   | 267 (57.5%)   | <0.0001 |
| CA before admission                         | 684 (0.42%)        | 1603 (44.98%) | <0.0001 | 1587 (51.2%)   | 16 (3.5%)     | <0.0001 |
| Sinus rhythm                                | 148001 (90.8%)     | 2884 (81.01%) | <0.0001 | 2523 (81.5%)   | 361 (77.8%)   | 0.059   |
| Atrial fibrillation                         | 9950 (6.1%)        | 365 (10.25%)  | <0.0001 | 301 (9.7%)     | 64 (13.8%)    | 0.0070  |
| Other rhythm                                | 3053 (1.87%)       | 244 (6.85%)   | <0.0001 | 220 (7.1%)     | 24 (5.2%)     | 0.12    |
| Normal QRS                                  | 134312 (82.53%)    | 2585 (72.96%) | <0.0001 | 2265 (73.5%)   | 320 (69.1%)   | 0.046   |
| LBBB                                        | 6661 (4.09%)       | 231 (6.52%)   | <0.0001 | 197 (6.4%)     | 34 (7.3%)     | 0.44    |
| RBBB                                        | 5890 (3.62%)       | 176 (4.97%)   | 0.00002 | 141 (4.6%)     | 35 (7.6%)     | 0.0059  |
| Other QRS abnormalities                     | 15889 (9.76%)      | 551 (15.55%)  | <0.0001 | 477 (15.5%)    | 74 (16%)      | 0.78    |
| Normal ST segment                           | 12740 (7.8%)       | 126 (3.54%)   | <0.0001 | 102 (3.3%)     | 24 (5.2%)     | 0.041   |
| ST segment elevation                        | 75016 (45.93%)     | 2270 (63.71%) | <0.0001 | 2019 (65.2%)   | 251 (54.1%)   | <0.0001 |
| ST segment depression                       | 38866 (23.8%)      | 621 (17.43%)  | <0.0001 | 522 (16.8%)    | 99 (21.3%)    | 0.017   |
| Negative T waves                            | 14509 (8.88%)      | 121 (3.4%)    | <0.0001 | 98 (3.2%)      | 23 (5%)       | 0.047   |
| Other ST segment abnormalities              | 21099 (12.92%)     | 410 (11.51%)  | 0.01288 | 346 (11.2%)    | 64 (13.8%)    | 0.098   |
| Killip class 1                              | 124975 (76.64%)    | 1575 (44.22%) | <0.0001 | 1365 (44.1%)   | 210 (45.3%)   | 0.63    |
| Killip class 2                              | 22920 (14.06%)     | 789 (22.15%)  | <0.0001 | 650 (21%)      | 139 (30%)     | <0.0001 |
| Killip class 3                              | 4676 (2.87%)       | 254 (7.13%)   | <0.0001 | 204 (6.6%)     | 50 (10.8%)    | 0.0011  |
| Killip class 4                              | 4674 (2.87%)       | 825 (23.16%)  | <0.0001 | 781 (25.2%)    | 44 (9.5%)     | <0.0001 |
| Thrombolysis                                | 609 (0.39%)        | 30 (0.89%)    | <0.0001 | 26 (0.9%)      | 4 (0.9%)      | 0.84    |
| Glycoprotein IIb/IIIa inhibitors            | 35829 (21.84%)     | 1255 (35.21%) | <0.0001 | 1110 (35.8%)   | 145 (31.3%)   | 0.055   |
| Anticoagulation (not associated with PCI)   | 84890 (52.08%)     | 2020 (56.71%) | <0.0001 | 1730 (55.8%)   | 290 (62.5%)   | 0.0069  |
| Coronary angiography                        | 149224 (90.99%)    | 3239 (90.93%) | 0.90814 | 2839 (91.6%)   | 400 (86.2%)   | 0.0001  |
| Infarct-related artery – RCA                | 44659 (29.92%)     | 1039 (32.06%) | 0.00848 | 932 (32.8%)    | 107 (26.8%)   | 0.015   |
| Infarct-related artery – LM                 | 3556 (2.38%)       | 159 (4.91%)   | <0.0001 | 130 (4.6%)     | 29 (7.3%)     | 0.020   |
| Infarct-related artery – LAD                | 51152 (34.27%)     | 1243 (38.35%) | <0.0001 | 1075 (37.8%)   | 168 (42%)     | 0.11    |
| Infarct-related artery – Cx                 | 28996 (19.42%)     | 517 (15.95%)  | <0.0001 | 457 (16.1%)    | 60 (15%)      | 0.58    |
| Infarct-related artery – bypass             | 1591 (1.07%)       | 28 (0.86%)    | 0.26724 | 24 (0.8%)      | 4 (1%)        | 0.98    |
| PCI                                         | 124365 (75.81%)    | 2920 (81.93%) | <0.0001 | 2570 (82.9%)   | 350 (75.4%)   | 0.0001  |
| TIMI 0 or 1 before PCI                      | 76990 (63.71%)     | 2157 (76.95%) | <0.0001 | 1921 (78.1%)   | 236 (68.6%)   | <0.0001 |
| TIMI 3 after PCI                            | 112057 (92.35%)    | 2419 (86.24%) | <0.0001 | 2128 (86.5%)   | 291 (84.4%)   | 0.28    |
| CABG                                        | 4627 (2.82%)       | 58 (1.63%)    | 0.00002 | 53 (1.7%)      | 5 (1.1%)      | 0.32    |
| Pacemaker                                   | 842 (0.51%)        | 44 (1.23%)    | <0.0001 | 33 (1.1%)      | 11 (2.4%)     | 0.017   |
| ICD                                         | 249 (0.15%)        | 62 (1.74%)    | <0.0001 | 35 (1.1%)      | 27 (5.8%)     | <0.0001 |
| CRT-D                                       | 25 (0.02%)         | 7 (0.2%)      | <0.0001 | 6 (0.2%)       | 1 (0.2%)      | 0.64    |
| ICD or CRT-D                                | 274 (0.17%)        | 69 (1.94%)    | <0.0001 | 41 (1.3%)      | 28 (6%)       | <0.0001 |
| Blood transfusion                           | 6087 (3.71%)       | 412 (11.56%)  | <0.0001 | 325 (10.5%)    | 87 (18.8%)    | <0.0001 |
| Ablation                                    | 27 (0.02%)         | 4 (0.11%)     | 0.00003 | 4 (0.1%)       | 0 (0%)        | 0.98    |
| Heart valve surgery                         | 360 (0.22%)        | 8 (0.22%)     | 0.94938 | 7 (0.2%)       | 1 (0.2%)      | 0.63    |
| IABP                                        | 2700 (1.65%)       | 406 (11.39%)  | <0.0001 | 349 (11.3%)    | 57 (12.3%)    | 0.52    |
| Massive bleeding                            | 2013 (1.23%)       | 228 (6.4%)    | <0.0001 | 175 (5.7%)     | 53 (11.4%)    | <0.0001 |
| Recurrent myocardial infarction             | 408 (0.25%)        | 67 (1.88%)    | <0.0001 | 42 (1.4%)      | 25 (5.4%)     | <0.0001 |

|                                               |              |               |         |             |             |         |
|-----------------------------------------------|--------------|---------------|---------|-------------|-------------|---------|
| Stroke                                        | 415 (0.25%)  | 51 (1.43%)    | <0.0001 | 44 (1.4%)   | 7 (1.5%)    | 0.88    |
| Pulmonary edema                               | 1840 (1.12%) | 263 (7.38%)   | <0.0001 | 203 (6.6%)  | 60 (12.9%)  | <0.0001 |
| Cardiogenic shock                             | 2545 (1.55%) | 686 (19.25%)  | <0.0001 | 568 (18.3%) | 118 (25.4%) | 0.0003  |
| Hospital CA                                   | 3002 (1.83%) | 2224 (62.4%)  | <0.0001 | 1766 (57%)  | 458 (98.7%) | <0.0001 |
| Mechanical complication: Heart rupture        | 135 (0.08%)  | 24 (0.67%)    | <0.0001 | 16 (0.5%)   | 8 (1.7%)    | 0.0030  |
| Mechanical complication: Mitral regurgitation | 65 (0.04%)   | 4 (0.11%)     | 0.03450 | 4 (0.1%)    | 0 (0%)      | 0.98    |
| Mechanical complication: VSD                  | 83 (0.05%)   | 3 (0.08%)     | 0.38109 | 2 (0.1%)    | 1 (0.2%)    | 0.85    |
| Mechanical complication: Heart rupture or VSD | 214 (0.13%)  | 27 (0.76%)    | <0.0001 | 18 (0.6%)   | 9 (1.9%)    | 0.0042  |
| Mechanical complications (all)                | 277 (0.17%)  | 30 (0.84%)    | <0.0001 | 21 (0.7%)   | 9 (1.9%)    | 0.012   |
| In-hospital death                             | 9790 (5.97%) | 1268 (35.58%) | <0.0001 | 994 (32.1%) | 274 (59.1%) | <0.0001 |

Abbreviations: ACE-I – angiotensin converting enzyme inhibitor; AMI – acute myocardial infarction; ARB – angiotensin receptor blocker; CA – cardiac arrest; CABG – coronary artery bypass grafting; CAD – coronary artery disease; ErCA – early resuscitated cardiac arrest; CRT-D – cardiac resynchronization therapy defibrillator; CRT-P – cardiac resynchronization therapy pacemaker; Cx – circumflex artery; IABP – intra-aortic balloon pump; ICD – implantable cardioverter defibrillator; ECG – electrocardiogram; LAD – left anterior descending; LBBB – left bundle branch block; LM – left main; LMWH – low molecular weight heparin; LrCA – late resuscitated cardiac arrest; NSTEMI – nonST segment myocardial infarction; PCI – percutaneous coronary intervention; RCA – right coronary artery; RBBB – right bundle branch block; rCA – resuscitated cardiac arrest; SD – standard deviation; STEMI – ST segment myocardial infarction; TIMI – The thrombolysis in myocardial infarction risk score; VSD – ventricular septal defect;.

## Supplementary Figure S1.

Multivariate logistic regression model of factors affecting in-hospital mortality in the whole cohort of patients.

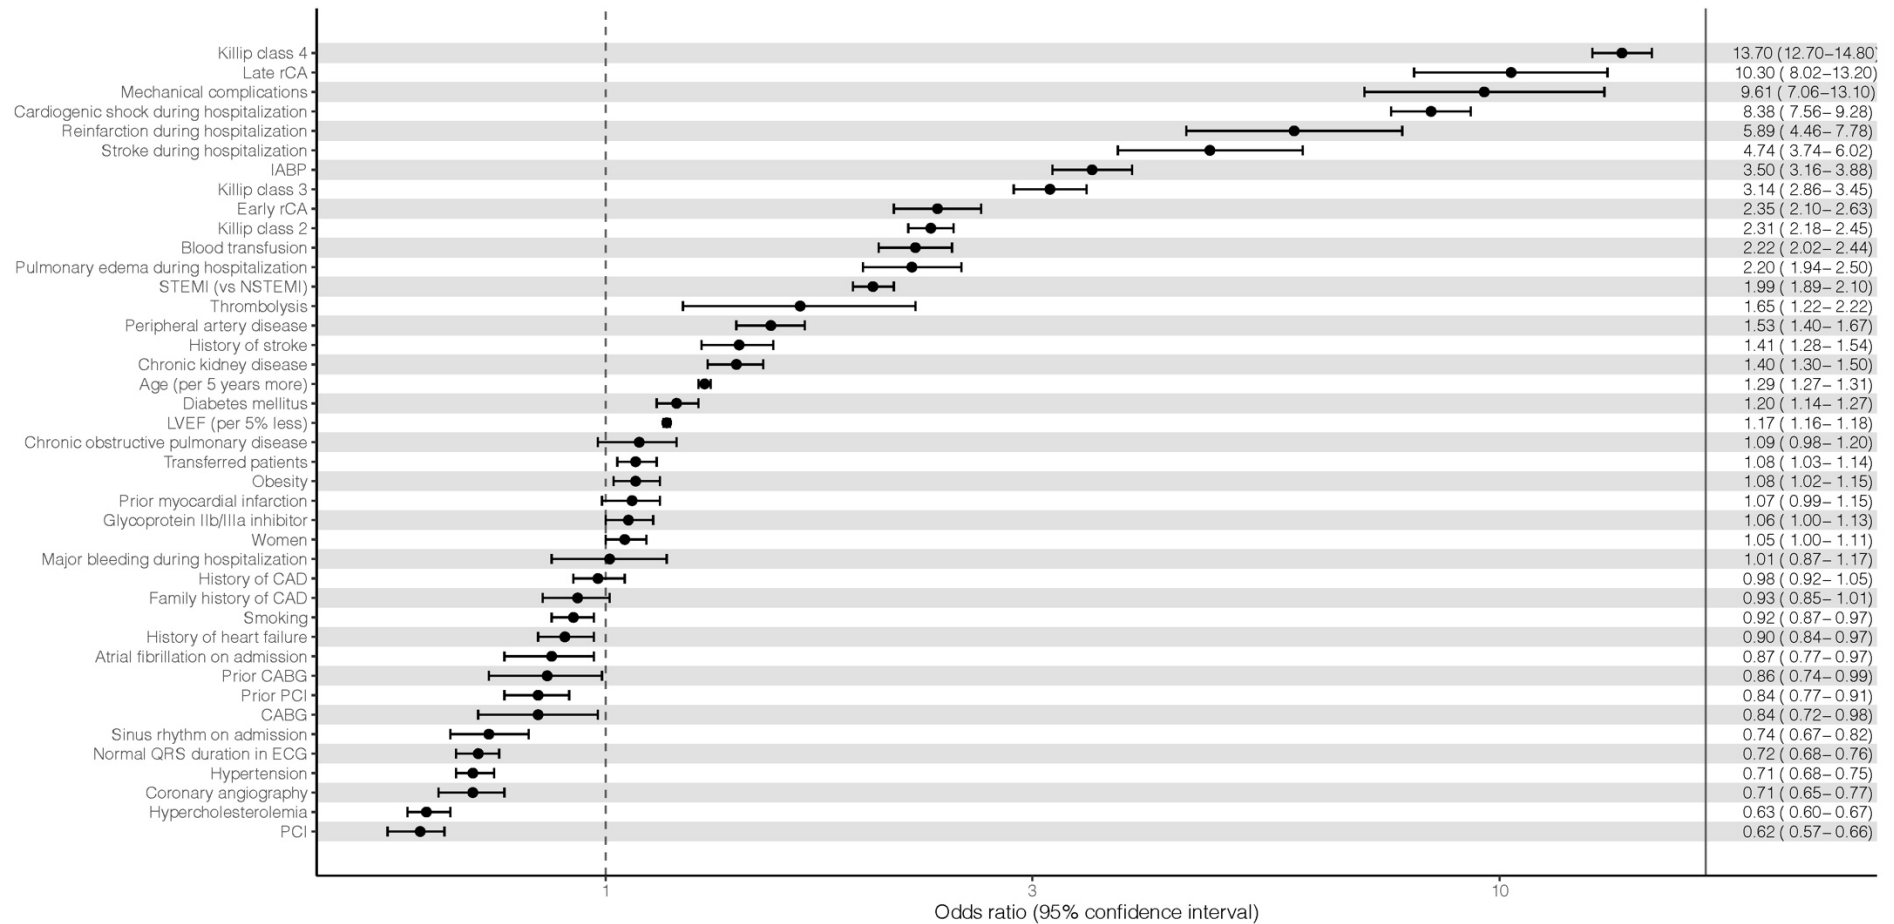



## Supplementary Figure S2.

Risk factors of the occurrence of resuscitated cardiac arrest (both early or late) in the cohort of patients that survived in-hospital period multivariate logistic regression model.

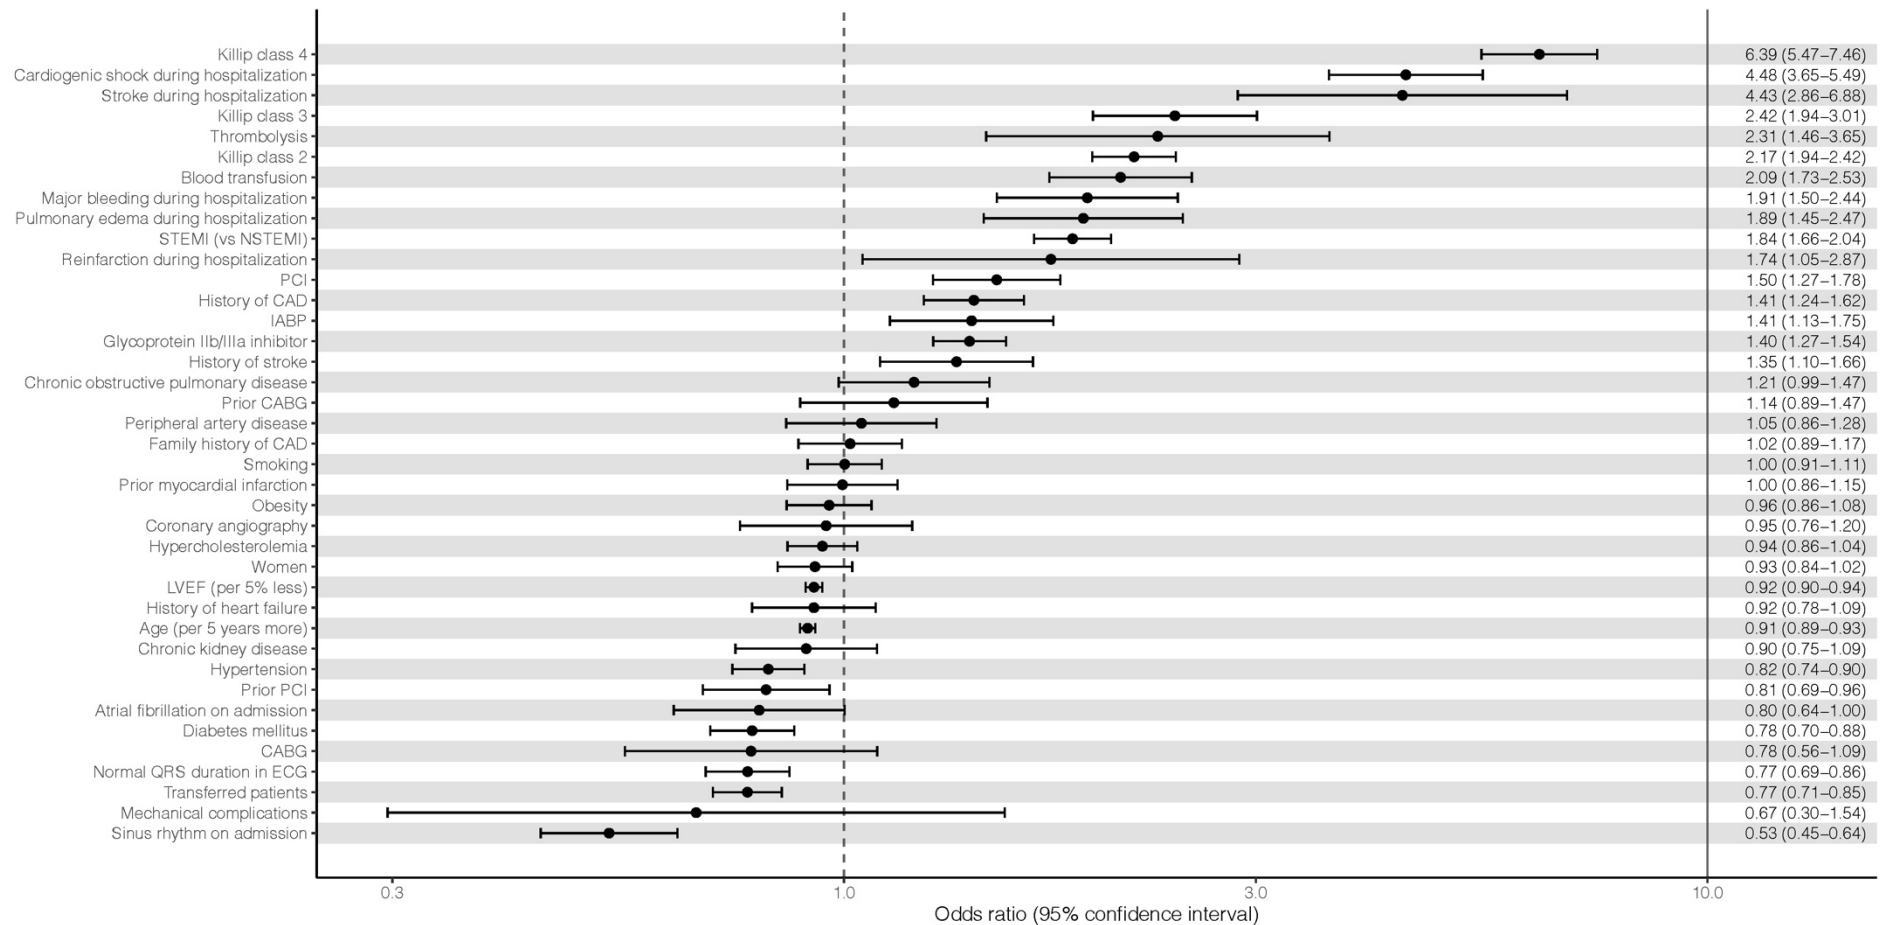

**Supplementary Figure S3.**

1-year survival (A), rehospitalizations (B-H) and procedures (I-K) in acute myocardial infarction patients discharged home who survived cardiac arrest (early or late) compared to patients without cardiac arrest.

## A) 1-year survival after discharge

### Unadjusted

|               | 1-year survival (95% CI) | Hazard ratio (95% CI) | P value |
|---------------|--------------------------|-----------------------|---------|
| <b>Non-CA</b> | 0.923 (0.921 - 0.924)    | 1                     |         |
| <b>rCA</b>    | 0.870 (0.856 - 0.884)    | 1.75 (1.56 – 1.96)    | <0.0001 |
| <b>ErCA</b>   | 0.877 (0.863 - 0.891)    | 1.64 (1.45 – 1.85)    | <0.0001 |
| <b>LrCA</b>   | 0.789 (0.734 – 0.850)    | 2.99 (2.19 – 4.07)    | <0.0001 |

CI – confidence interval; CA – cardiac arrest; rCA – resuscitated cardiac arrest; ErCA – early resuscitated cardiac arrest; LrCA – late resuscitated cardiac arrest

### Adjusted for baseline characteristics and revascularization

|               | 1-year survival (95% CI) | Hazard ratio (95% CI) | P value |
|---------------|--------------------------|-----------------------|---------|
| <b>Non-CA</b> | 0.922 (0.921 - 0.924)    | 1                     |         |
| <b>rCA</b>    | 0.878 (0.858 - 0.897)    | 1.62 (1.37 – 1.92)    | <0.0001 |
| <b>ErCA</b>   | 0.880 (0.859 - 0.902)    | 1.58 (1.31 – 1.91)    | <0.0001 |
| <b>LrCA</b>   | 0.834 (0.764 – 0.911)    | 2.28 (1.40 – 3.72)    | <0.0001 |

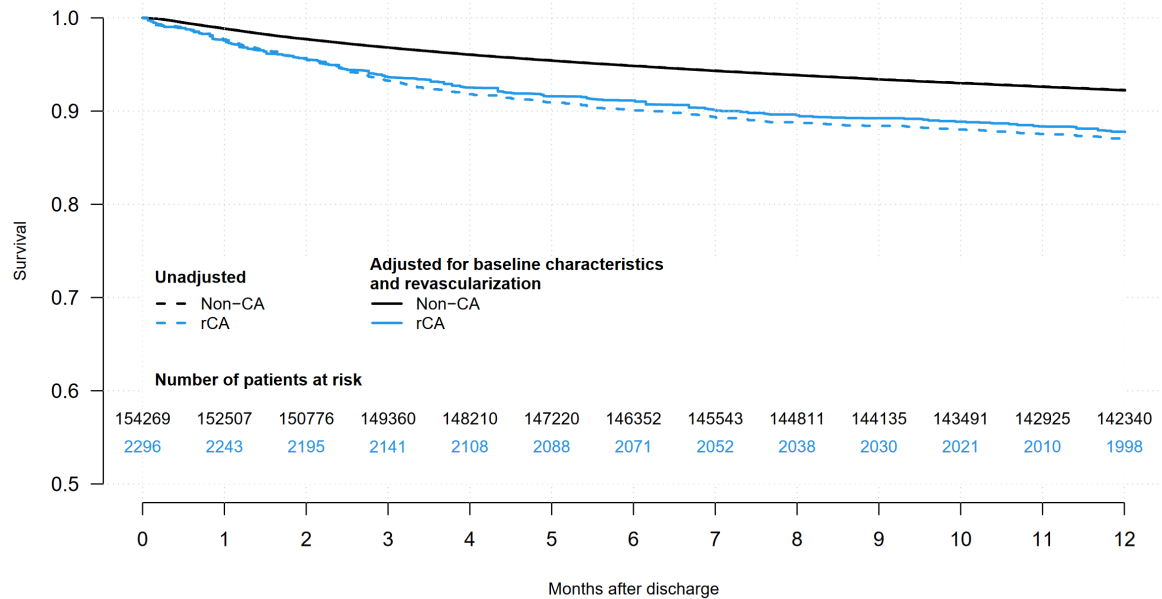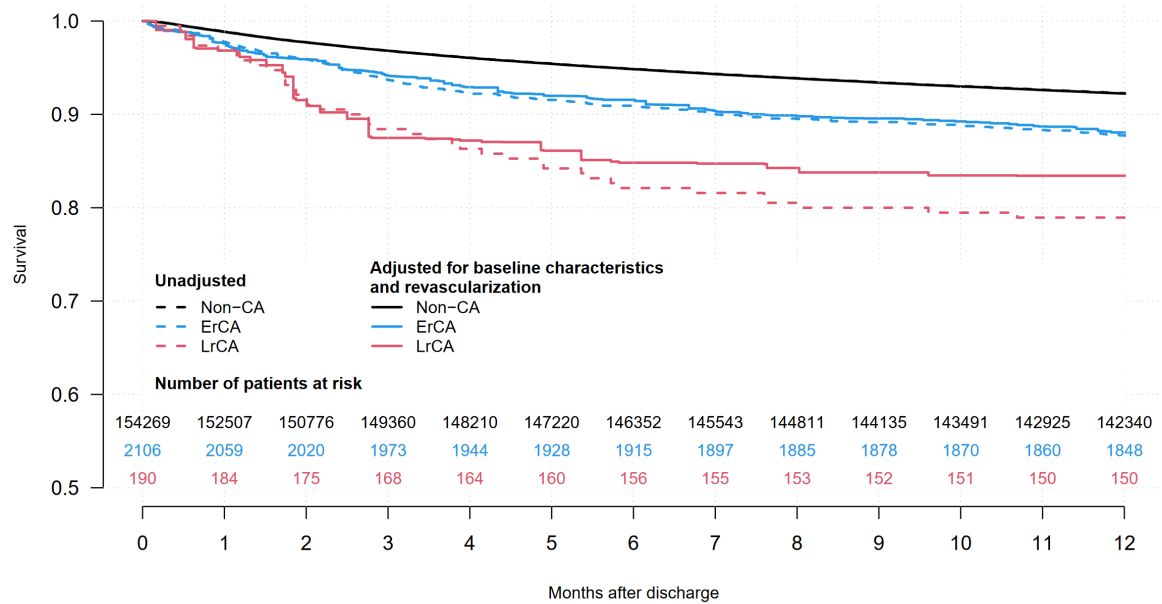

# Adjusted for baseline characteristics, revascularization, and in-hospital complications

|               | 1-year survival (95% CI) | Hazard ratio (95% CI) | P value |
|---------------|--------------------------|-----------------------|---------|
| <b>Non-CA</b> | 0.922 (0.920 - 0.923)    | 1                     |         |
| <b>rCA</b>    | 0.880 (0.860 - 0.900)    | 1.58 (1.32 – 1.89)    | <0.0001 |
| <b>ErCA</b>   | 0.881 (0.860 - 0.904)    | 1.55 (1.28 – 1.90)    | <0.0001 |
| <b>LrCA</b>   | 0.840 (0.772 – 0.914)    | 2.17 (1.33 – 3.54)    | 0.00185 |

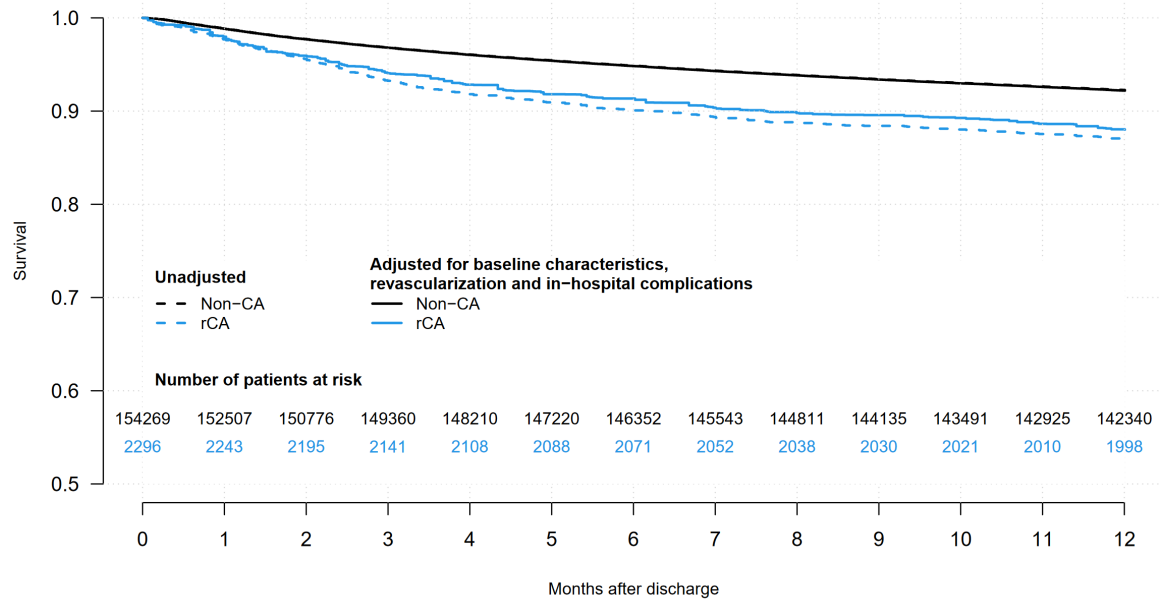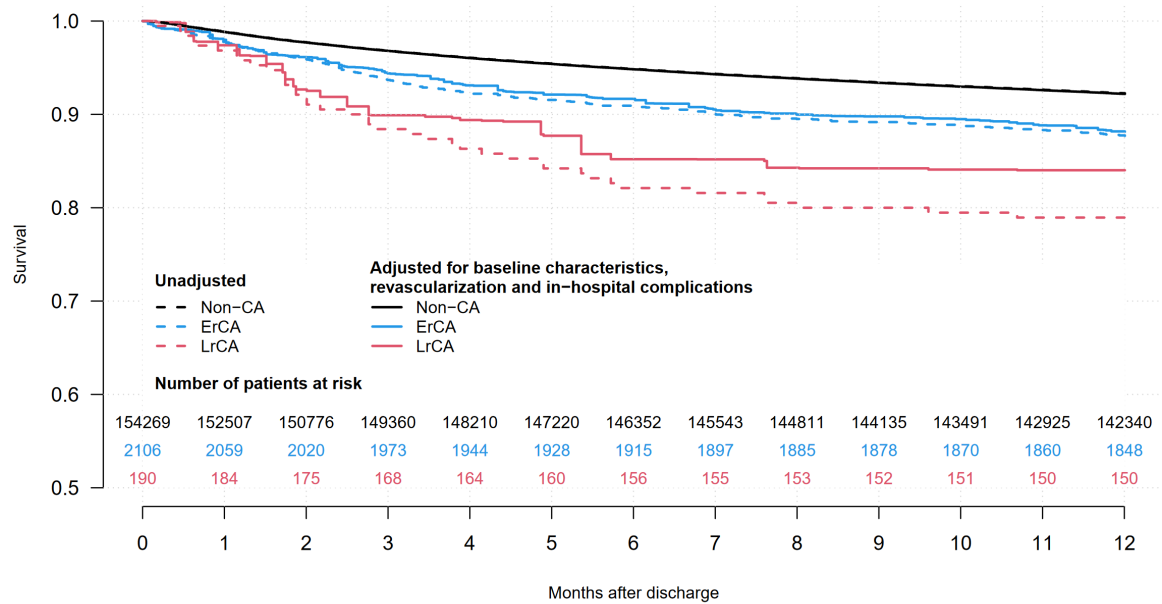

**Adjusted for baseline characteristics, revascularization, in-hospital complications, and treatment procedures**

|               | 1-year survival (95% CI) | Hazard ratio (95% CI) | P value |
|---------------|--------------------------|-----------------------|---------|
| <b>Non-CA</b> | 0.922 (0.920 - 0.923)    | 1                     |         |
| <b>rCA</b>    | 0.880 (0.860 - 0.901)    | 1.57 (1.30 – 1.87)    | <0.0001 |
| <b>ErCA</b>   | 0.882 (0.860 - 0.905)    | 1.54 (1.28 – 1.89)    | <0.0001 |
| <b>LrCA</b>   | 0.828 (0.751 – 0.913)    | 2.34 (1.39 – 3.93)    | 0.00134 |

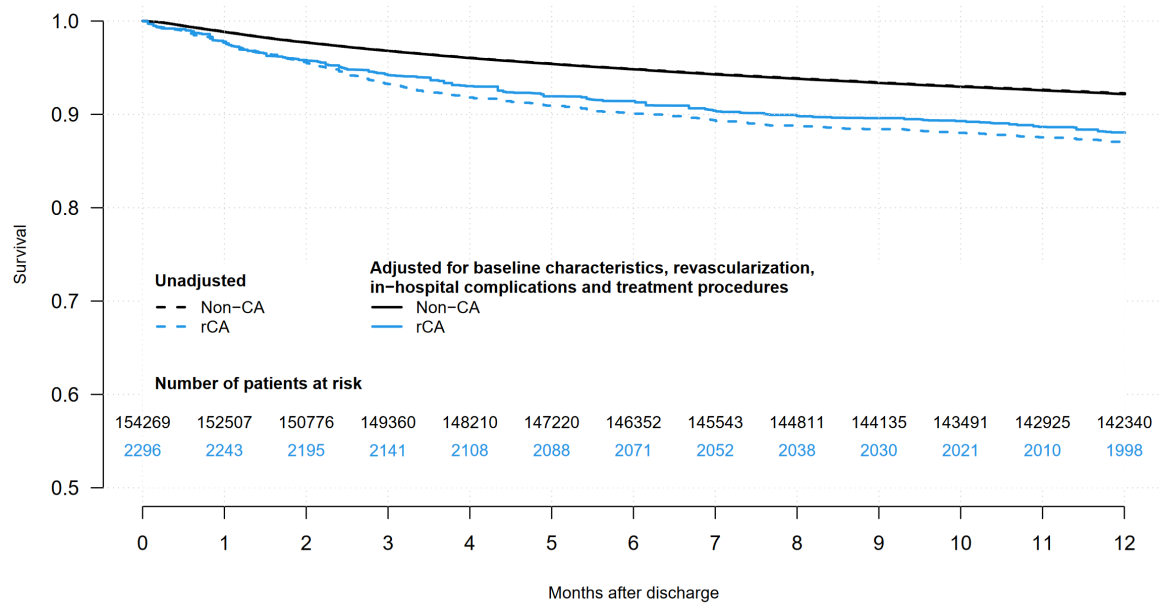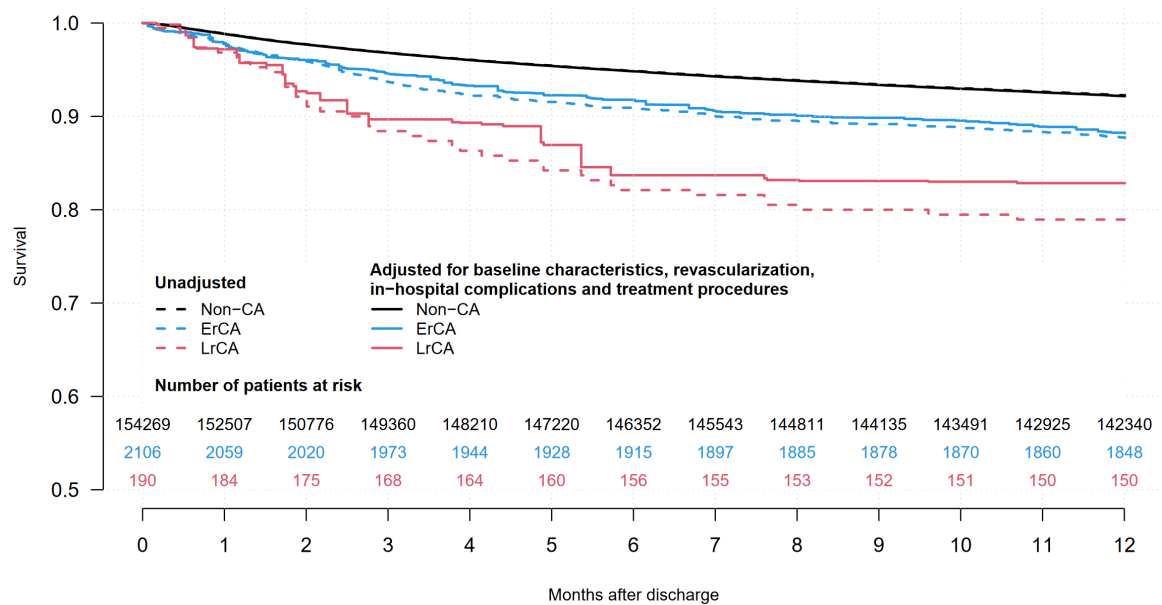

### Relative risk of 1-year death from any reason

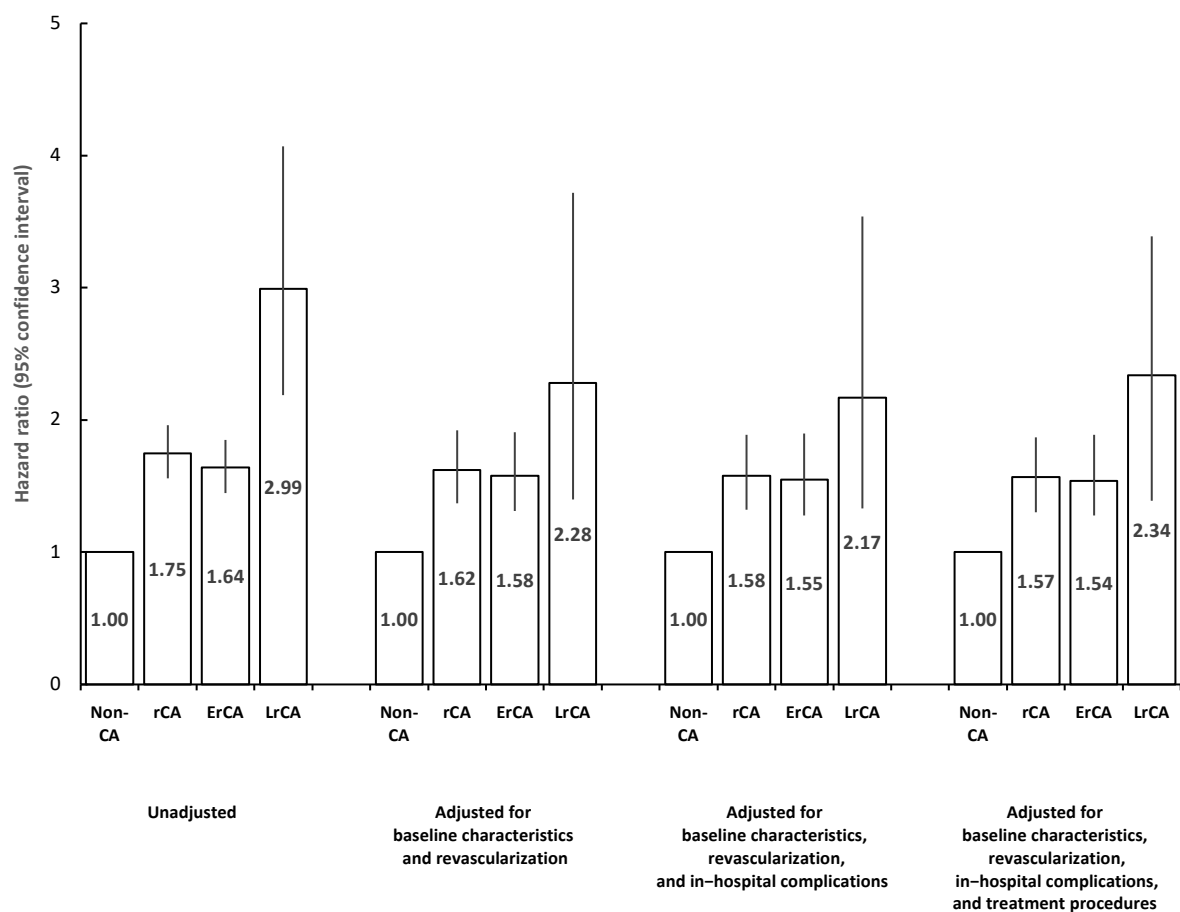

CA – cardiac arrest; rCA – resuscitated cardiac arrest; ErCA – early resuscitated cardiac arrest; LrCA – late resuscitated cardiac arrest

**B) 1 year re-hospitalization due to acute myocardial infarction****Unadjusted**

|               | 1-year event-free (95% CI) | Hazard ratio (95% CI) | P value |
|---------------|----------------------------|-----------------------|---------|
| <b>Non-CA</b> | 0.944 (0.943 - 0.945)      | 1                     |         |
| <b>rCA</b>    | 0.952 (0.943 - 0.961)      | 0.85 (0.71 – 1.03)    | 0.101   |
| <b>ErCA</b>   | 0.954 (0.945 - 0.963)      | 0.82 (0.67 – 1.00)    | 0.0536  |
| <b>LrCA</b>   | 0.932 (0.896 – 0.968)      | 1.23 (0.71– 2.11)     | 0.4637  |

CI – confidence interval; CA – cardiac arrest; rCA – resuscitated cardiac arrest; ErCA – early resuscitated cardiac arrest; LrCA – late resuscitated cardiac arrest



### Adjusted for baseline characteristics and revascularization

|               | 1-year event-free (95% CI) | Hazard ratio (95% CI) | P value |
|---------------|----------------------------|-----------------------|---------|
| <b>Non-CA</b> | 0.944 (0.943 - 0.946)      | 1                     |         |
| <b>rCA</b>    | 0.951 (0.938 - 0.965)      | 0.88(0.66– 1.16)      | 0.365   |
| <b>ErCA</b>   | 0.952 (0.937 - 0.967)      | 0.86 (0.63 – 1.19)    | 0.371   |
| <b>LrCA</b>   | 0.931 (0.882 – 0.982)      | 1.25 (0.56– 2.62)     | 0.546   |

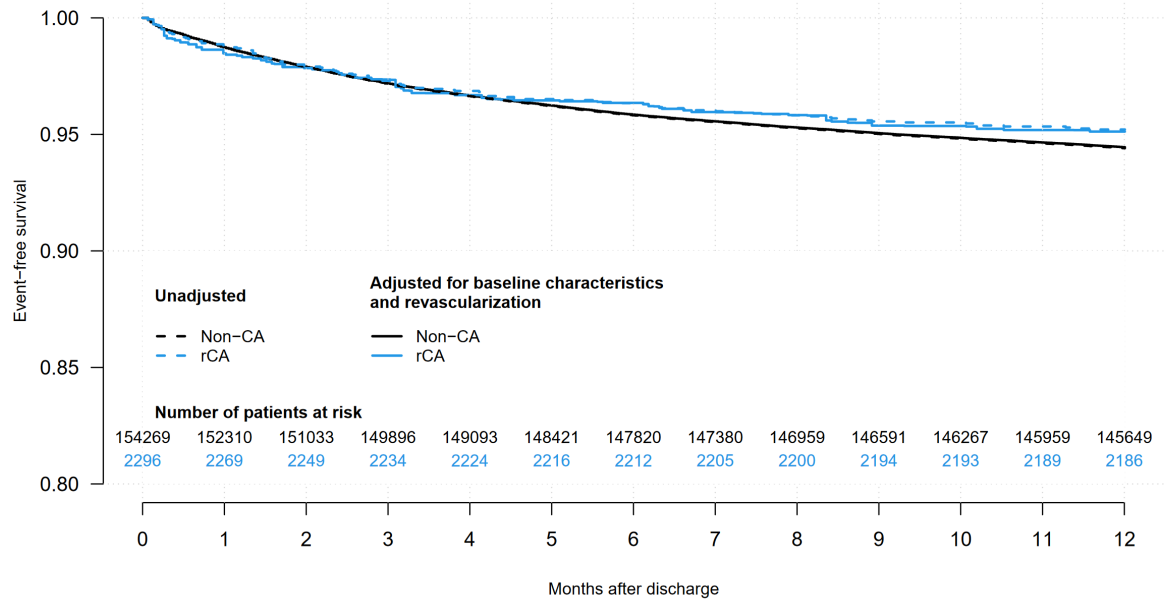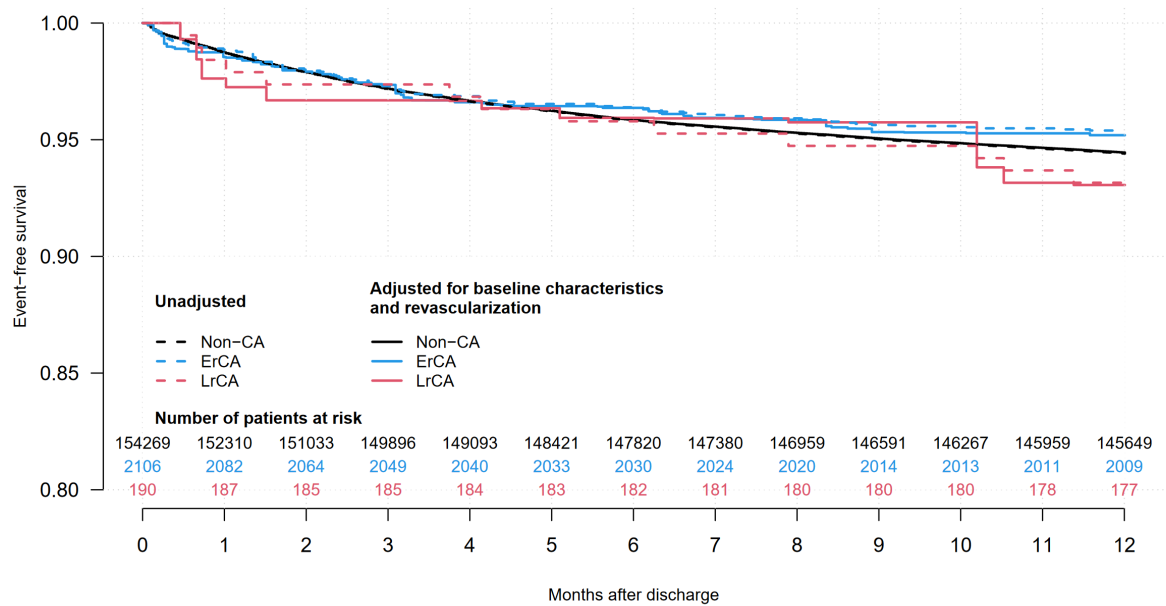

### Adjusted for baseline characteristics, revascularization, and in-hospital complications

|               | 1-year event-free (95% CI) | Hazard ratio (95% CI) | P value |
|---------------|----------------------------|-----------------------|---------|
| <b>Non-CA</b> | 0.945 (0.943 - 0.946)      | 1                     |         |
| <b>rCA</b>    | 0.952 (0.939 - 0.966)      | 0.86 (0.65 – 1.15)    | 0.308   |
| <b>ErCA</b>   | 0.952 (0.937 - 0.967)      | 0.87 (0.63– 1.19)     | 0.384   |
| <b>LrCA</b>   | 0.929 (0.871 – 0.992)      | 1.28 (0.53– 3.06)     | 0.586   |

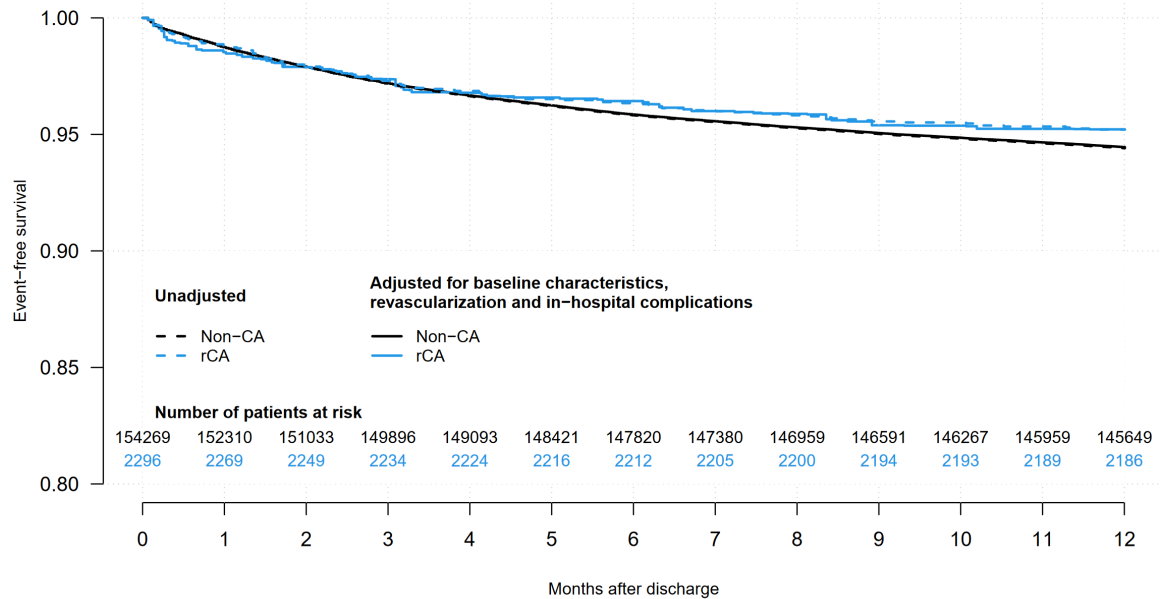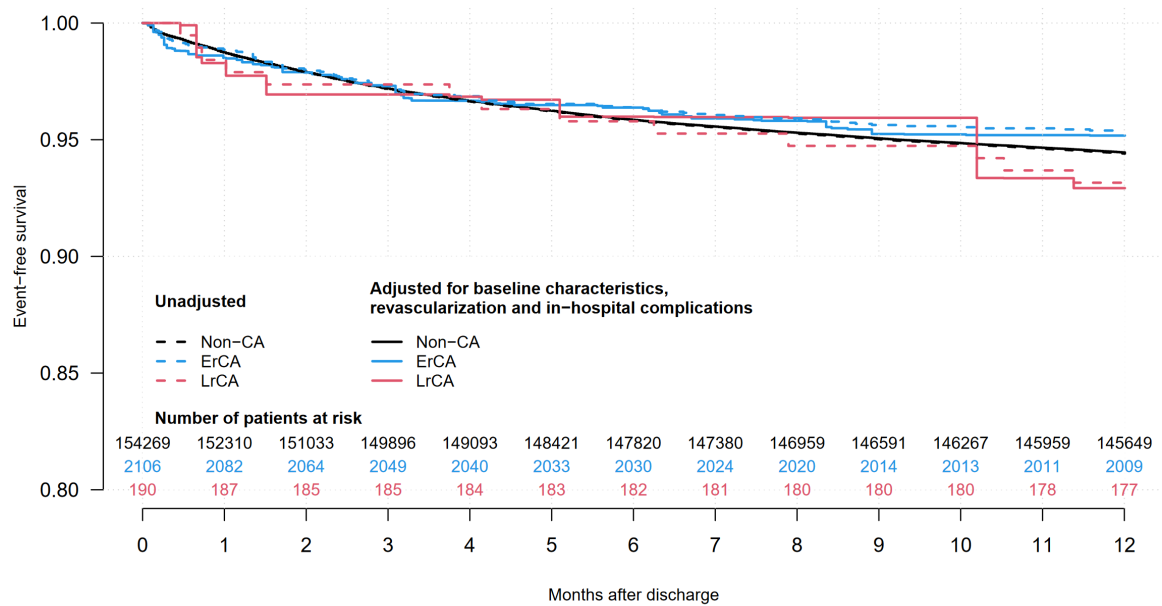

**Adjusted for baseline characteristics, revascularization, in-hospital complications, and treatment procedures**

|               | 1-year event-free (95% CI) | Hazard ratio (95% CI) | P value |
|---------------|----------------------------|-----------------------|---------|
| <b>Non-CA</b> | 0.945 (0.943 – 0.946)      | 1                     |         |
| <b>rCA</b>    | 0.952 (0.938 - 0.966)      | 0.87 (0.64 – 1.17)    | 0.348   |
| <b>ErCA</b>   | 0.952 (0.936 - 0.967)      | 0.87 (0.63 – 1.21)    | 0.419   |
| <b>LrCA</b>   | 0.922 (0.852 – 0.999)      | 1.40 (0.53 – 3.71)    | 0.497   |

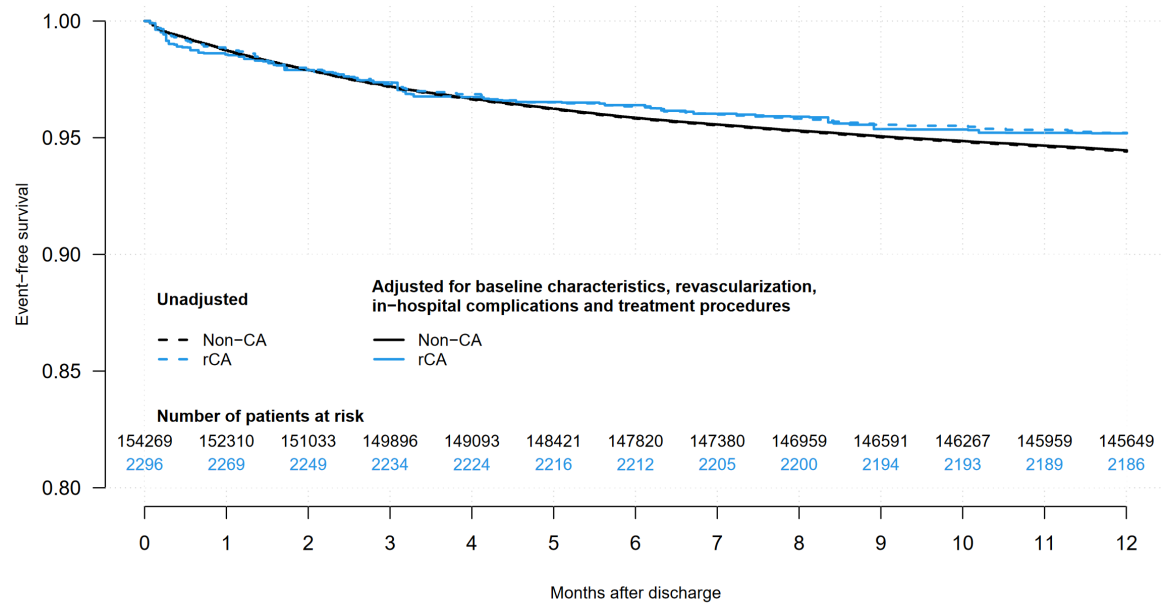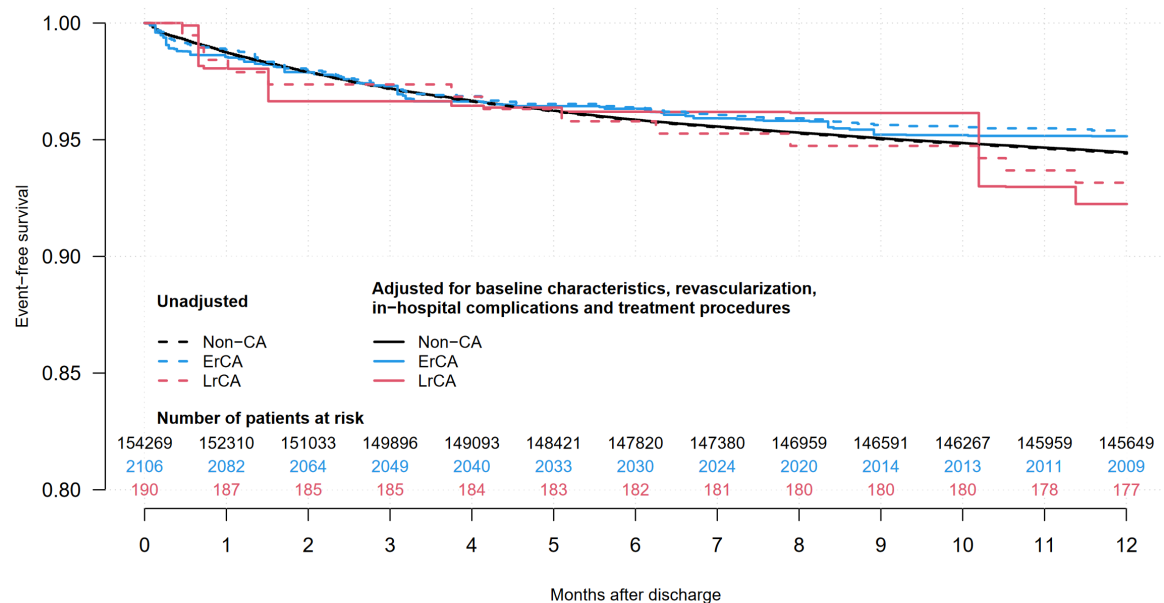

### Relative risk of 1-year re-hospitalization due to acute myocardial infarction

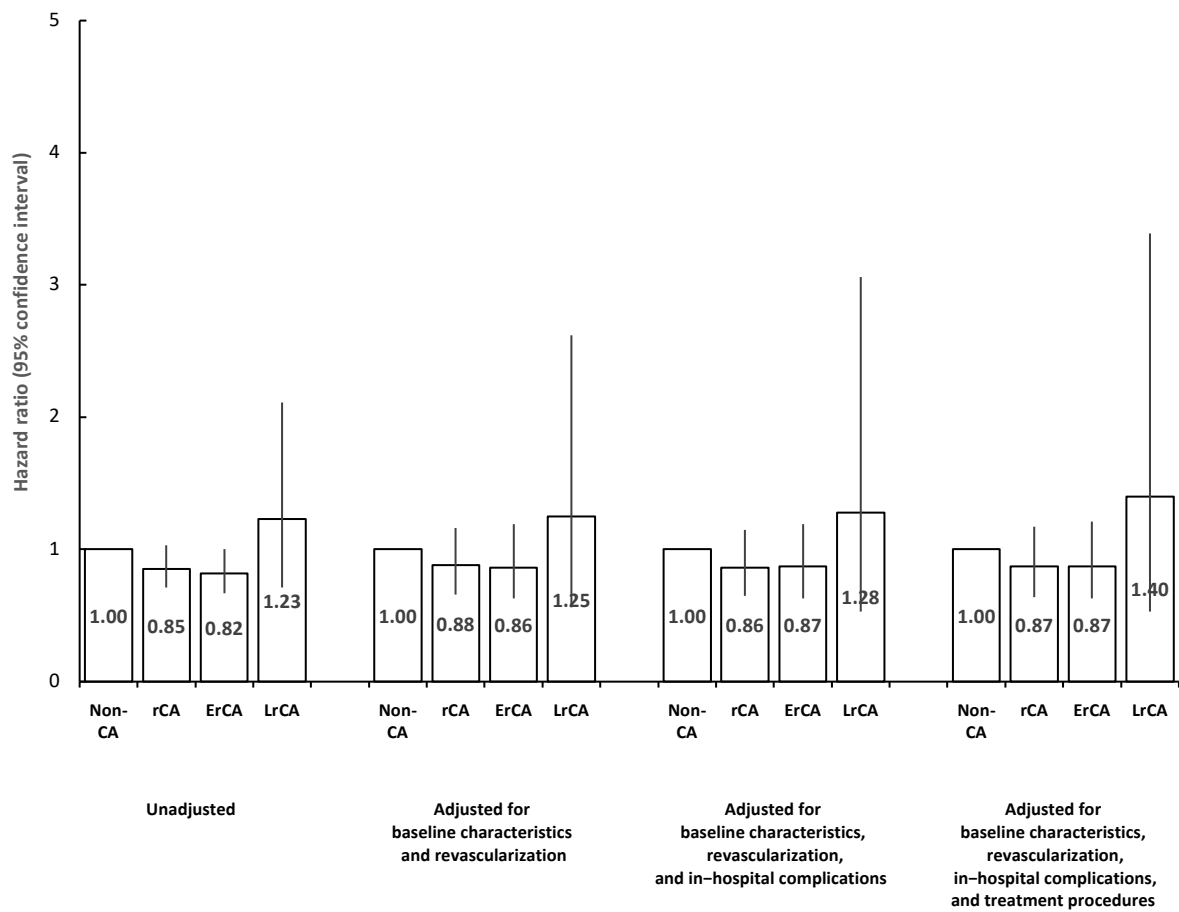

CA – cardiac arrest; rCA – resuscitated cardiac arrest; ErCA – early resuscitated cardiac arrest; LrCA – late resuscitated cardiac arrest

### C) 1 year re-hospitalization due to **unstable angina**

#### Unadjusted

|               | 1-year event-free (95% CI) | Hazard ratio (95% CI) | P value |
|---------------|----------------------------|-----------------------|---------|
| <b>Non-CA</b> | 0.874 (0.872 - 0.875)      | 1                     |         |
| <b>rCA</b>    | 0.902 (0.889 - 0.914)      | 0.77 (0.67 – 0.87)    | <0.0001 |
| <b>ErCA</b>   | 0.898 (0.886 - 0.911)      | 0.79 (0.69 – 0.91)    | 0.0007  |
| <b>LrCA</b>   | 0.937 (0.903 – 0.972)      | 0.48 (0.27– 0.85)     | 0.0111  |

CI – confidence interval; CA – cardiac arrest; rCA – resuscitated cardiac arrest; ErCA – early resuscitated cardiac arrest; LrCA – late resuscitated cardiac arrest

### Adjusted for baseline characteristics and revascularization

|               | 1-year event-free (95% CI) | Hazard ratio (95% CI) | P value |
|---------------|----------------------------|-----------------------|---------|
| <b>Non-CA</b> | 0.872 (0.870 - 0.873)      | 1                     |         |
| <b>rCA</b>    | 0.889 (0.869 - 0.910)      | 0.86 (0.71– 1.04)     | 0.116   |
| <b>ErCA</b>   | 0.886 (0.864 - 0.908)      | 0.89 (0.72 – 1.09)    | 0.244   |
| <b>LrCA</b>   | 0.930 (0.877 – 0.987)      | 0.53 (0.23 – 1.21)    | 0.131   |

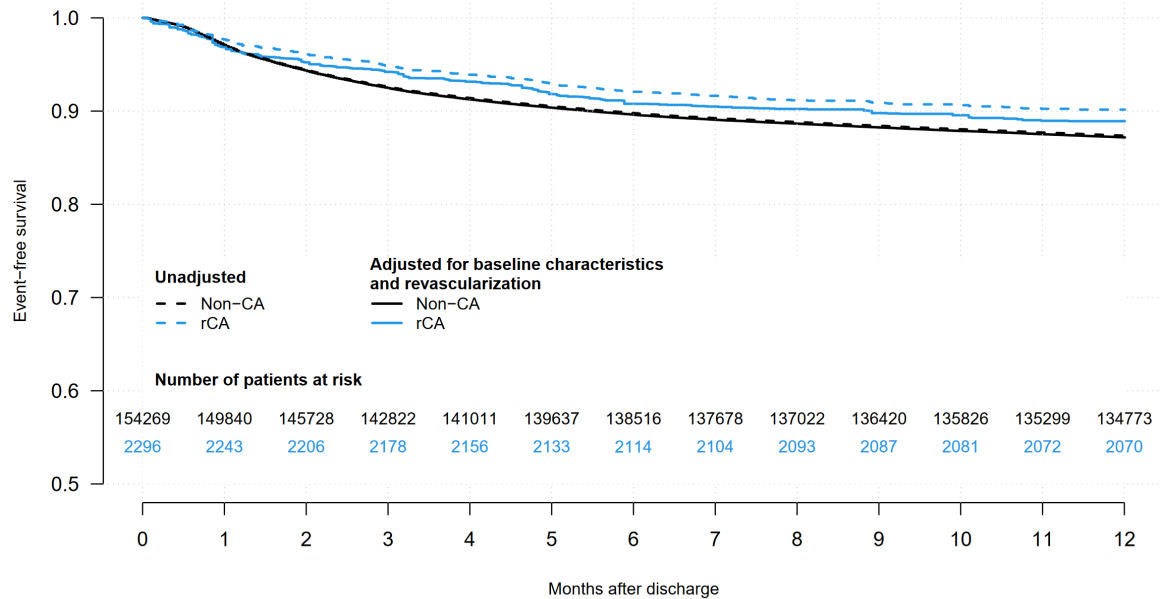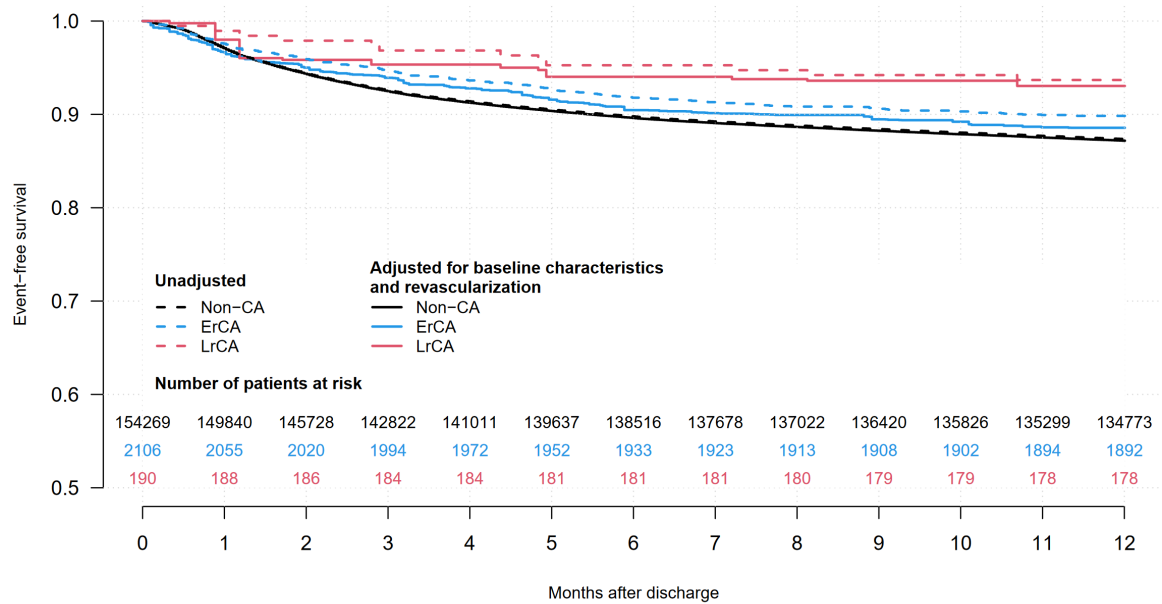

# Adjusted for baseline characteristics, revascularization, and in-hospital complications

|               | 1-year event-free (95% CI) | Hazard ratio (95% CI) | P value |
|---------------|----------------------------|-----------------------|---------|
| <b>Non-CA</b> | 0.872 (0.870 - 0.873)      | 1                     |         |
| <b>rCA</b>    | 0.898 (0.880 - 0.916)      | 0.78 (0.65 - 0.95)    | 0.0131  |
| <b>ErCA</b>   | 0.895 (0.875 - 0.915)      | 0.81 (0.66 - 0.99)    | 0.0403  |
| <b>LrCA</b>   | 0.929 (0.866 - 0.998)      | 0.54 (0.20 - 1.43)    | 0.2134  |

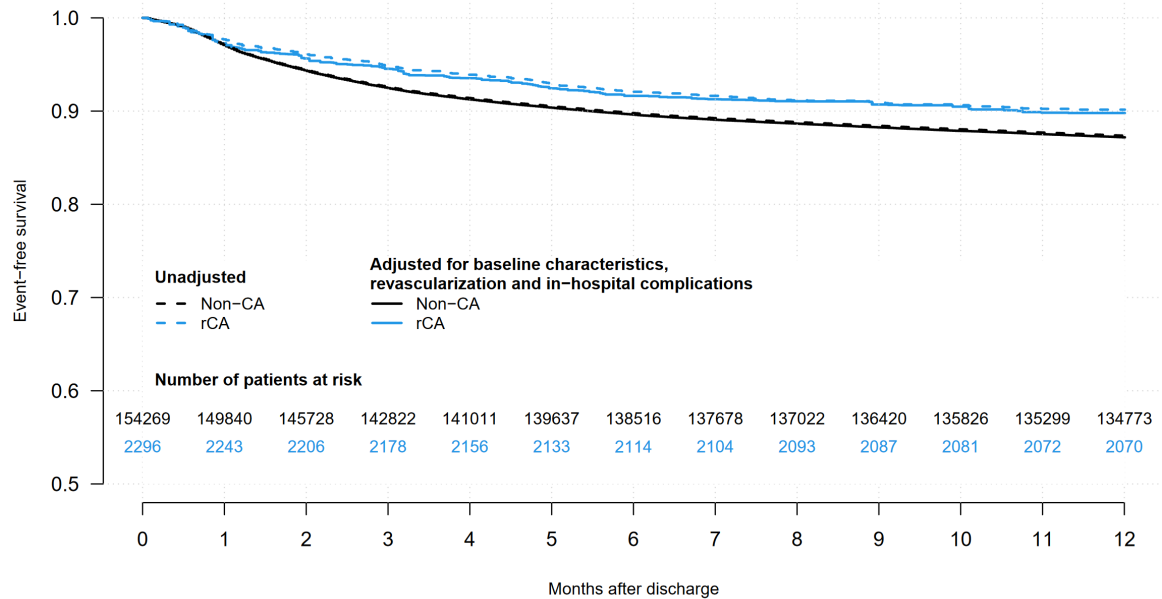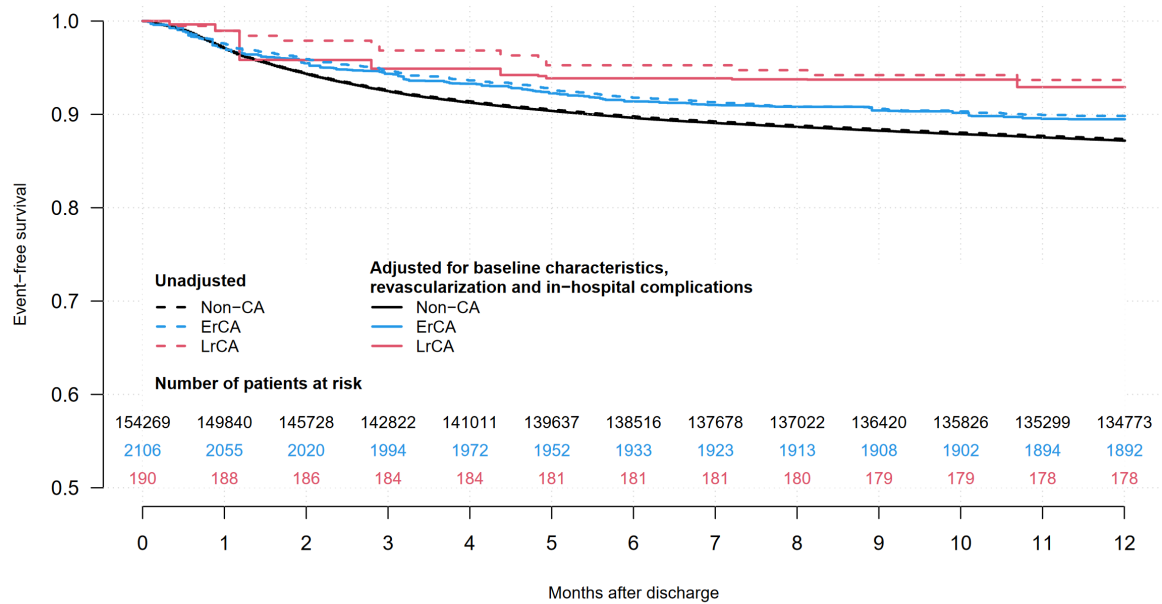

**Adjusted for baseline characteristics, revascularization, in-hospital complications, and treatment procedures**

|               | 1-year event-free (95% CI) | Hazard ratio (95% CI) | P value |
|---------------|----------------------------|-----------------------|---------|
| <b>Non-CA</b> | 0.872 (0.870 – 0.874)      | 1                     |         |
| <b>rCA</b>    | 0.896 (0.878 - 0.916)      | 0.80 (0.66 – 0.97)    | 0.0232  |
| <b>ErCA</b>   | 0.893 (0.873 - 0.914)      | 0.82 (0.67 – 1.01)    | 0.0585  |
| <b>LrCA</b>   | 0.919 (0.845 – 0.999)      | 0.62 (0.23 – 1.66)    | 0.3389  |

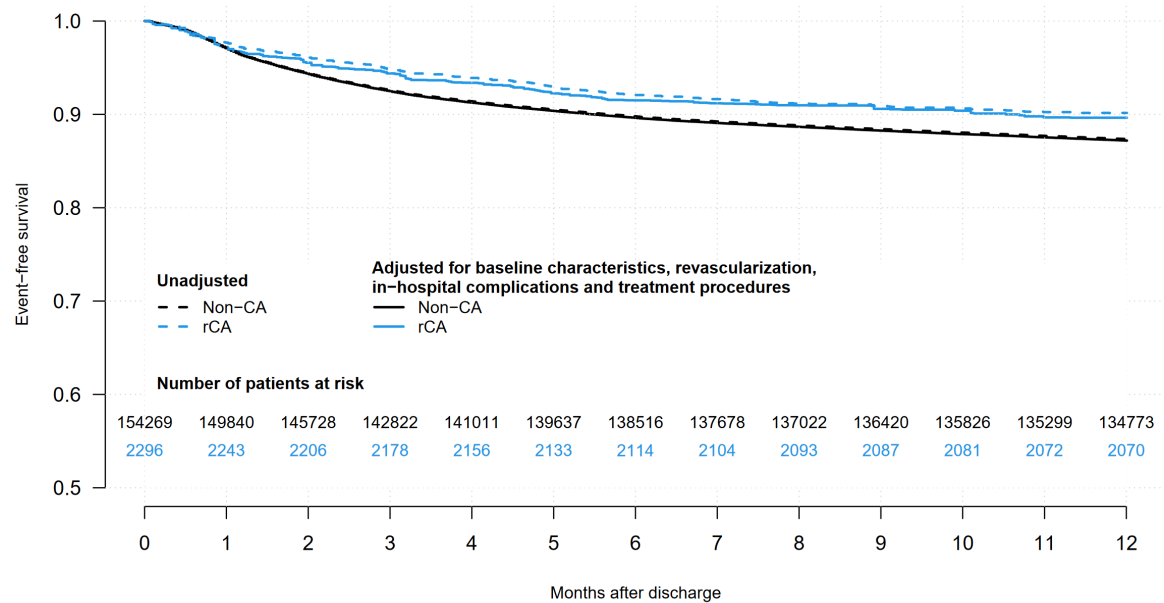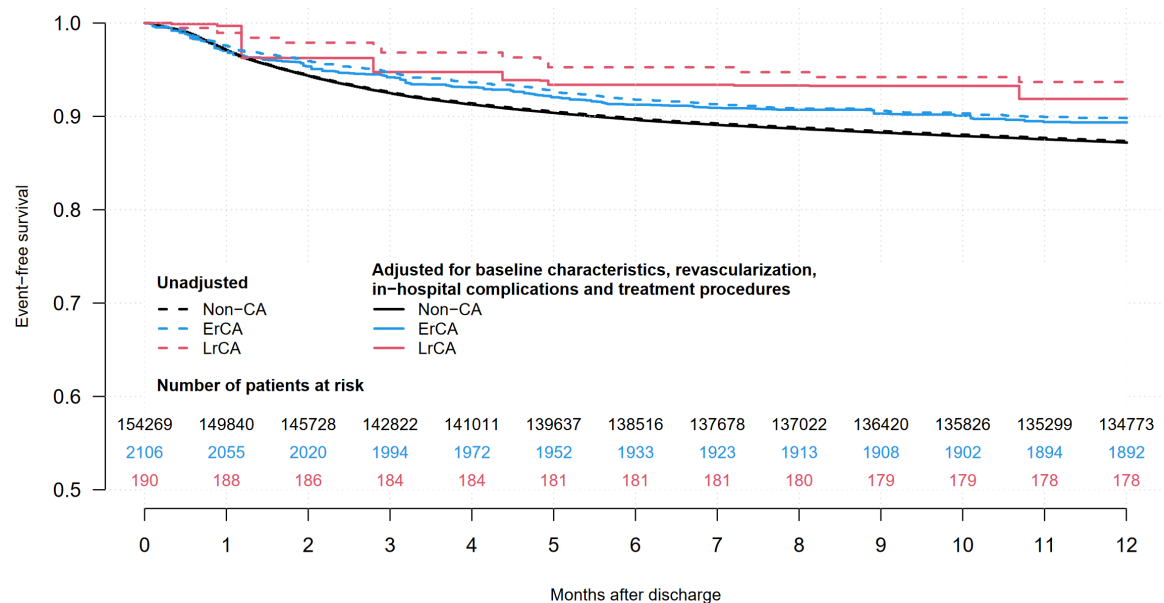



### Relative risk of 1-year re-hospitalization due to unstable angina

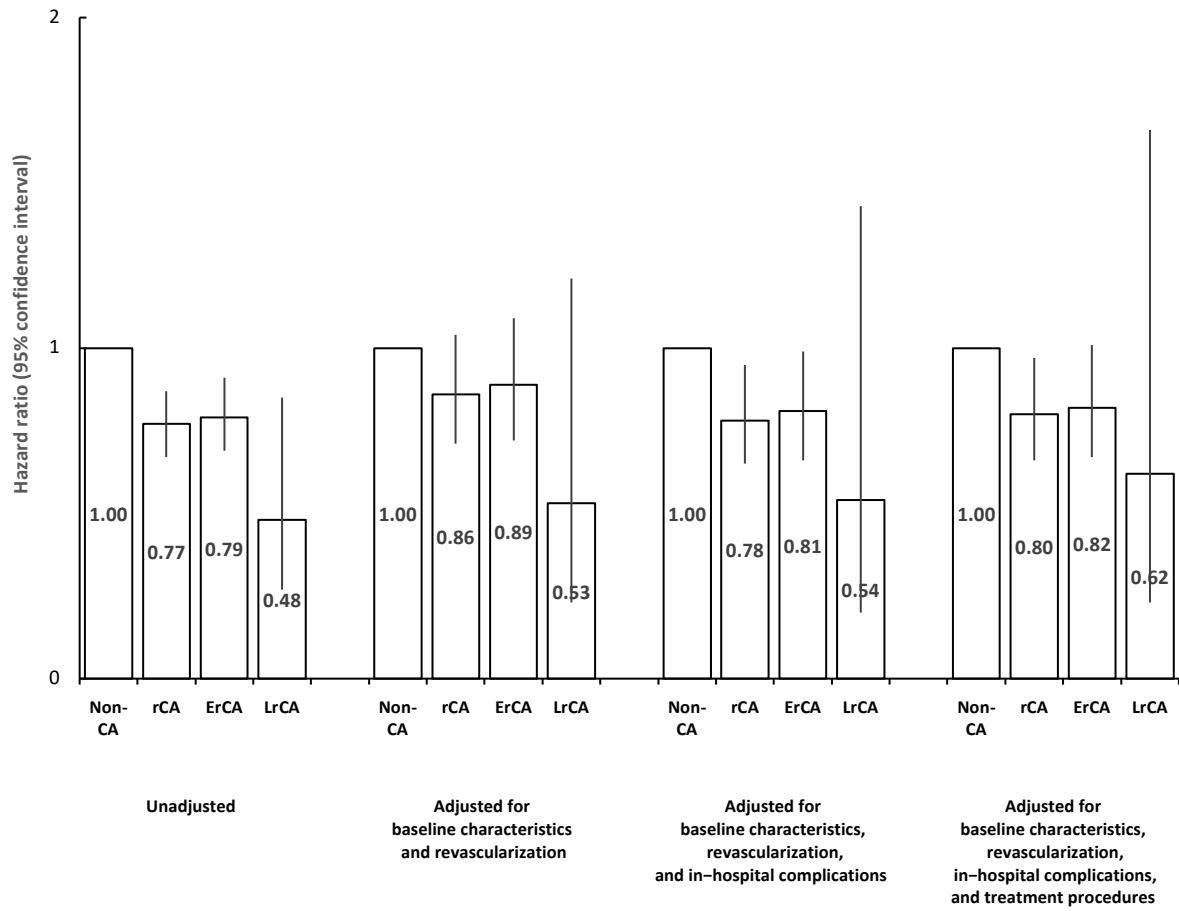

CA – cardiac arrest; rCA – resuscitated cardiac arrest; ErCA – early resuscitated cardiac arrest; LrCA – late resuscitated cardiac arrest

#### D) 1 year re-hospitalization due to **chronic coronary syndrome**

##### Unadjusted

|               | 1-year event-free (95% CI) | Hazard ratio (95% CI) | P value |
|---------------|----------------------------|-----------------------|---------|
| <b>Non-CA</b> | 0.762 (0.759 - 0.764)      | 1                     |         |
| <b>rCA</b>    | 0.756 (0.738 - 0.733)      | 1.02 (0.94 – 1.11)    | 0.577   |
| <b>ErCA</b>   | 0.746 (0.728 - 0.765)      | 1.07 (0.98 – 1.16)    | 0.13029 |
| <b>LrCA</b>   | 0.858 (0.810 – 0.909)      | 0.56 (0.39 – 0.82)    | 0.00286 |

CI – confidence interval; CA – cardiac arrest; rCA – resuscitated cardiac arrest; ErCA – early resuscitated cardiac arrest; LrCA – late resuscitated cardiac arrest

## Adjusted for baseline characteristics and revascularization

|               | 1-year event-free (95% CI) | Hazard ratio (95% CI) | P value |
|---------------|----------------------------|-----------------------|---------|
| <b>Non-CA</b> | 0.762 (0.760 - 0.764)      | 1                     |         |
| <b>rCA</b>    | 0.770 (0.748 - 0.794)      | 0.96 (0.85 – 1.07)    | 0.443   |
| <b>ErCA</b>   | 0.765 (0.740 - 0.790)      | 0.98 (0.87 – 1.11)    | 0.7919  |
| <b>LrCA</b>   | 0.848 (0.778 – 0.924)      | 0.61 (0.36 – 1.04)    | 0.0668  |

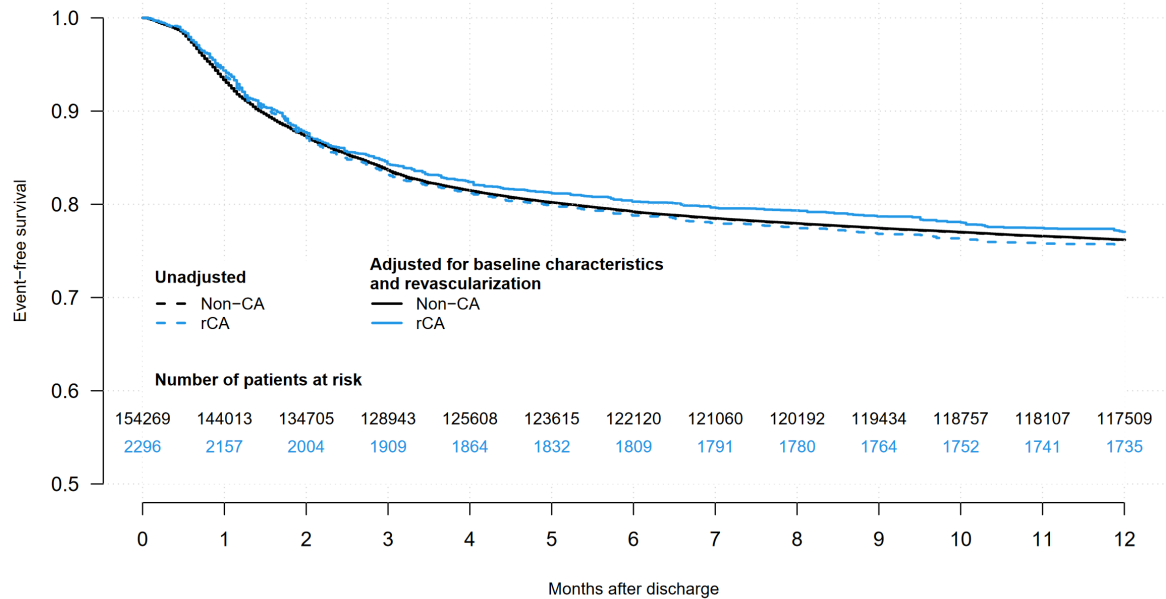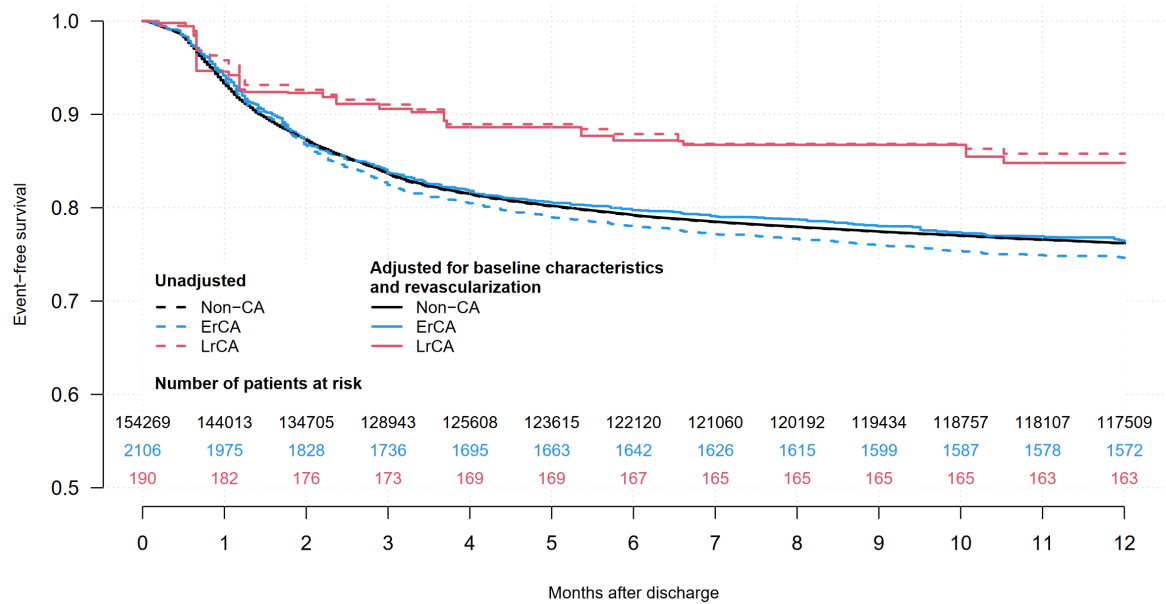

# Adjusted for baseline characteristics, revascularization, and in-hospital complications

|               | 1-year event-free (95% CI) | Hazard ratio (95% CI) | P value |
|---------------|----------------------------|-----------------------|---------|
| <b>Non-CA</b> | 0.762 (0.760 - 0.764)      | 1                     |         |
| <b>rCA</b>    | 0.764 (0.740 - 0.789)      | 0.99 (0.88 – 1.11)    | 0.845   |
| <b>ErCA</b>   | 0.758 (0.732 - 0.784)      | 1.02 (0.90 – 1.15)    | 0.7658  |
| <b>LrCA</b>   | 0.872 (0.798 – 0.953)      | 0.51 (0.26 – 1.04)    | 0.0513  |

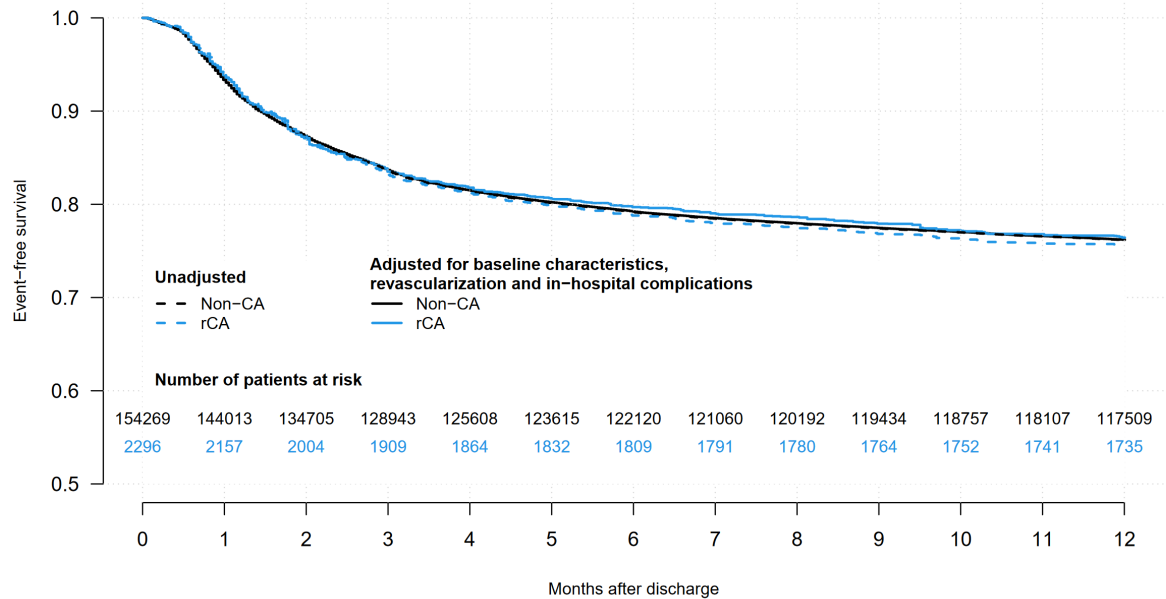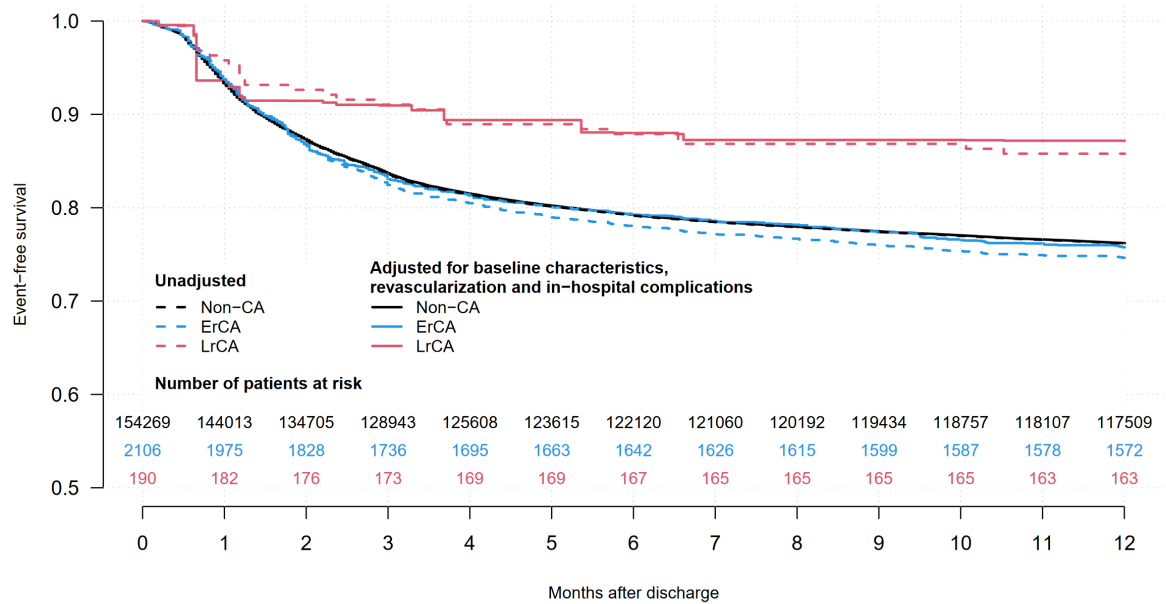

**Adjusted for baseline characteristics, revascularization, in-hospital complications, and treatment procedures**

|               | 1-year event-free (95% CI) | Hazard ratio (95% CI) | P value |
|---------------|----------------------------|-----------------------|---------|
| <b>Non-CA</b> | 0.762 (0.760 - 0.764)      | 1                     |         |
| <b>rCA</b>    | 0.757 (0.732 - 0.783)      | 1.02 (0.91 – 1.16)    | 0.702   |
| <b>ErCA</b>   | 0.752 (0.726 - 0.779)      | 1.05 (0.92 – 1.18)    | 0.474   |
| <b>LrCA</b>   | 0.854 (0.768 – 0.950)      | 0.59 (0.30 – 1.18)    | 0.138   |

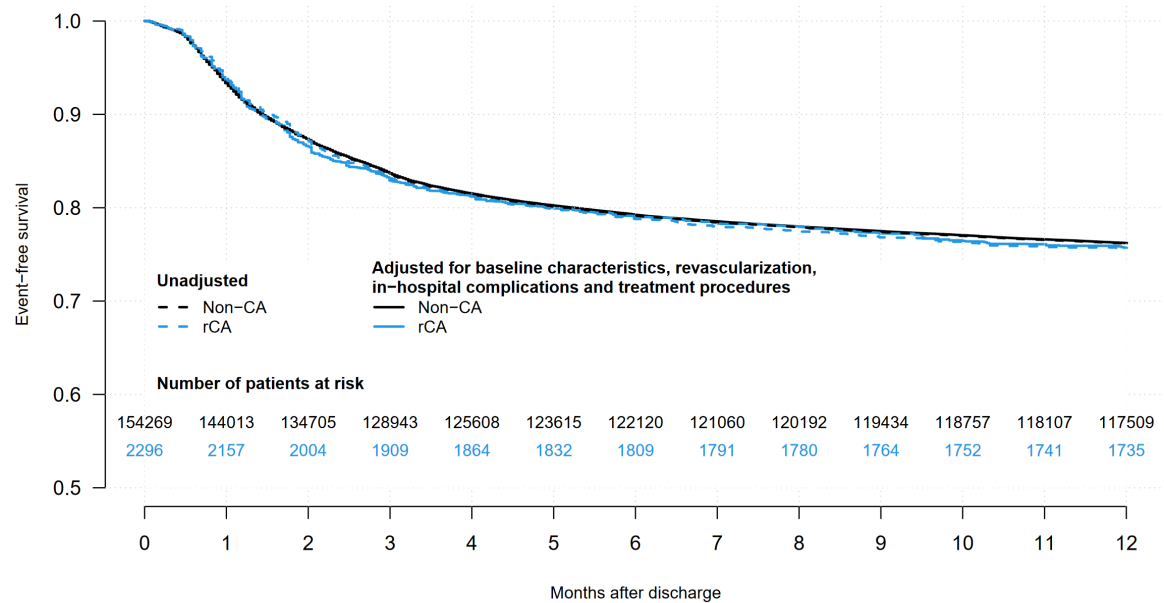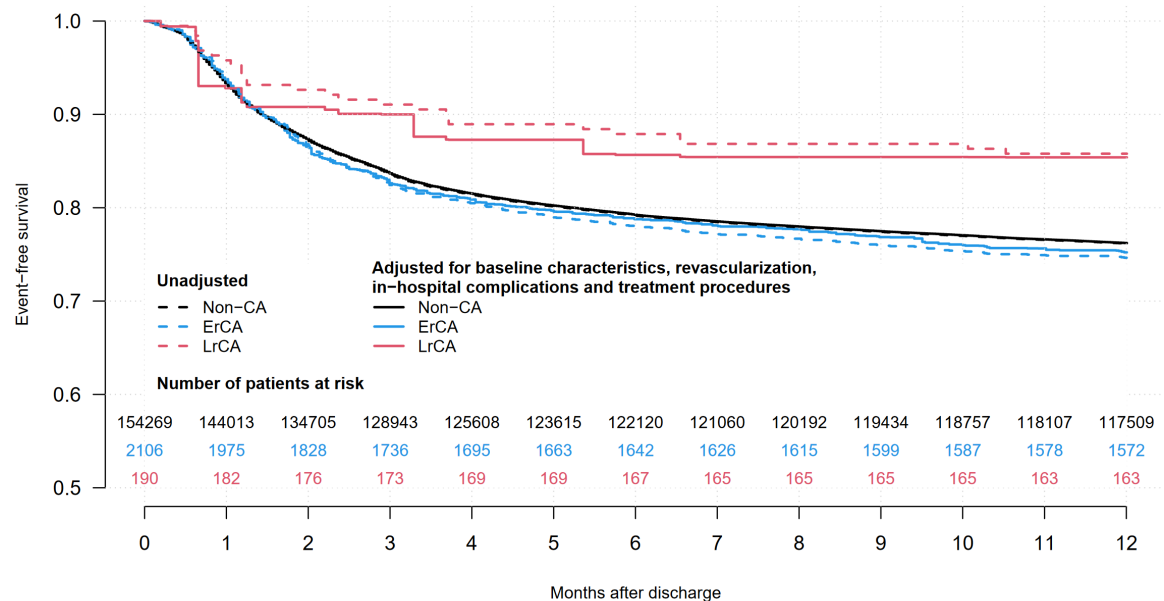

### Relative risk of 1-year re-hospitalization due to chronic coronary syndrome

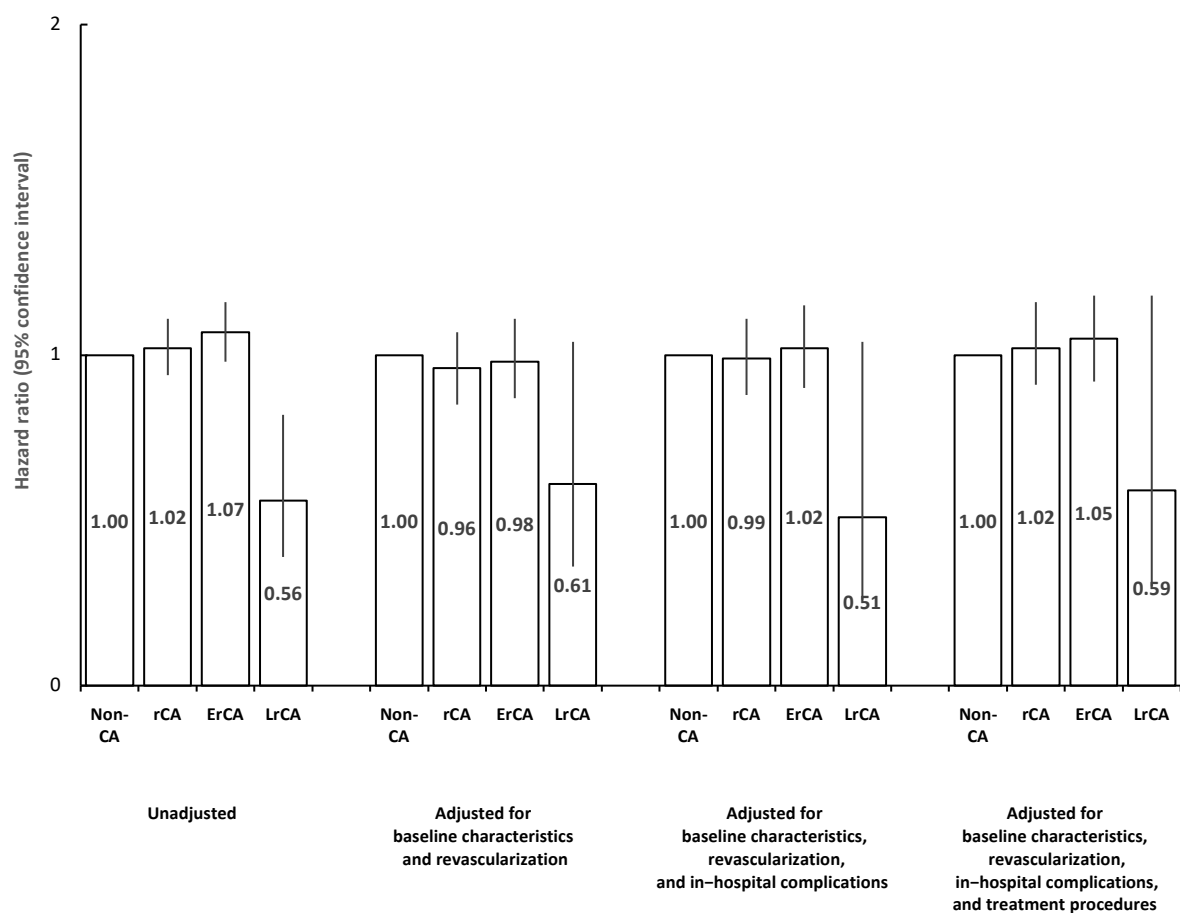

CA – cardiac arrest; rCA – resuscitated cardiac arrest; ErCA – early resuscitated cardiac arrest; LrCA – late resuscitated cardiac arrest

**E) 1 year re-hospitalization due to **ischemic heart disease** (chronic coronary syndrome or unstable angina or acute myocardial infarction)**

**Unadjusted**

|               | <b>1-year event-free (95% CI)</b> | <b>Hazard ratio (95% CI)</b> | <b>P value</b> |
|---------------|-----------------------------------|------------------------------|----------------|
| <b>Non-CA</b> | 0.642 (0.640 - 0.644)             | 1                            |                |
| <b>rCA</b>    | 0.664 (0.645 - 0.683)             | 0.92 (0.86 – 0.99)           | 0.023          |
| <b>ErCA</b>   | 0.655 (0.635 - 0.676)             | 0.95 (0.88 – 1.02)           | 0.17235        |
| <b>LrCA</b>   | 0.758 (0.699 – 0.821)             | 0.62 (0.46 – 0.83)           | 0.00115        |

CI – confidence interval; CA – cardiac arrest; rCA – resuscitated cardiac arrest; ErCA – early resuscitated cardiac arrest; LrCA – late resuscitated cardiac arrest

### Adjusted for baseline characteristics and revascularization

|               | 1-year event-free (95% CI) | Hazard ratio (95% CI) | P value |
|---------------|----------------------------|-----------------------|---------|
| <b>Non-CA</b> | 0.642 (0.639 - 0.644)      | 1                     |         |
| <b>rCA</b>    | 0.662 (0.635 - 0.690)      | 0.93 (0.84 – 1.03)    | 0.14    |
| <b>ErCA</b>   | 0.656 (0.627 - 0.686)      | 0.95 (0.86 – 1.06)    | 0.3431  |
| <b>LrCA</b>   | 0.736 (0.649 – 0.835)      | 0.69 (0.45 – 1.05)    | 0.0816  |

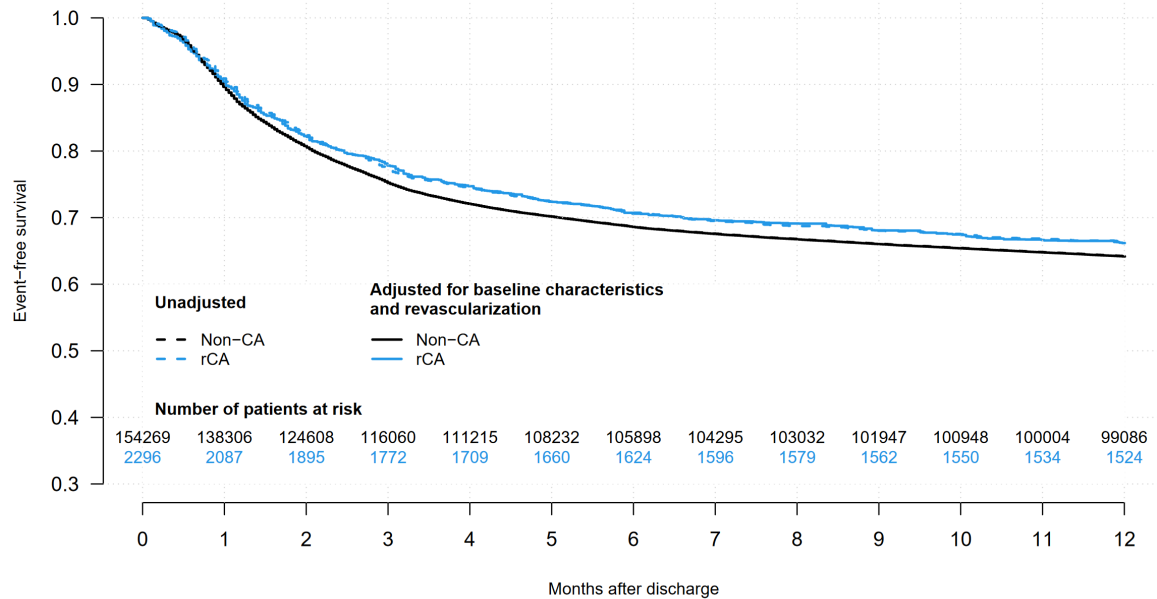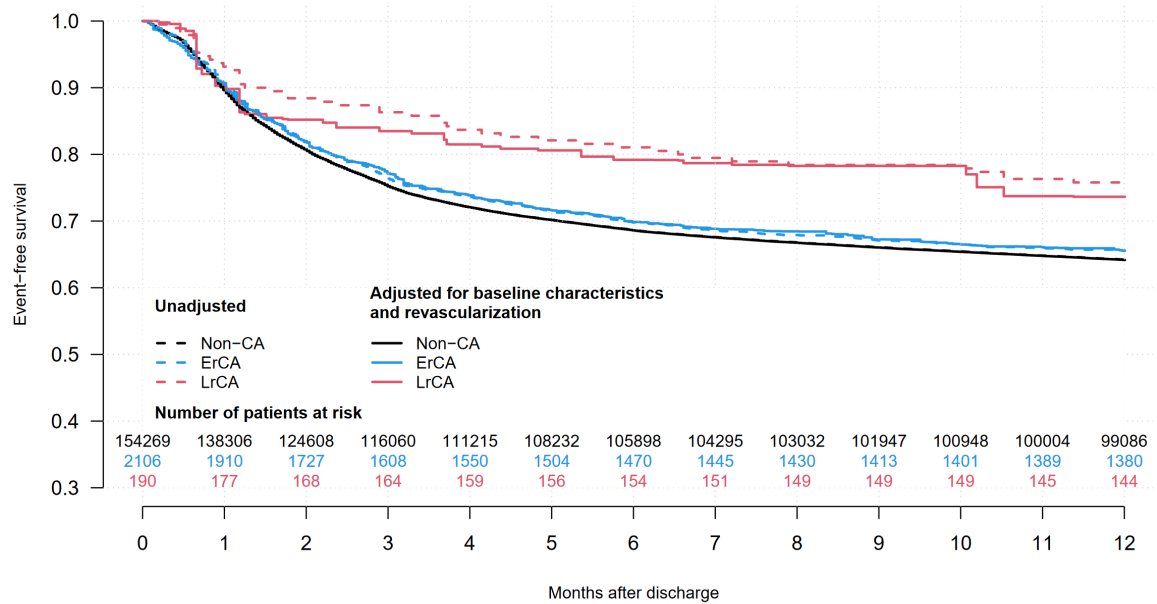



# Adjusted for baseline characteristics, revascularization, and in-hospital complications

|               | 1-year event-free (95% CI) | Hazard ratio (95% CI) | P value |
|---------------|----------------------------|-----------------------|---------|
| <b>Non-CA</b> | 0.642 (0.639 - 0.644)      | 1                     |         |
| <b>rCA</b>    | 0.668 (0.640 - 0.696)      | 0.91 (0.82 – 1.01)    | 0.0789  |
| <b>ErCA</b>   | 0.659 (0.631 - 0.689)      | 0.94 (0.85 – 1.05)    | 0.2556  |
| <b>LrCA</b>   | 0.763 (0.666 – 0.874)      | 0.62 (0.37 – 1.03)    | 0.0672  |

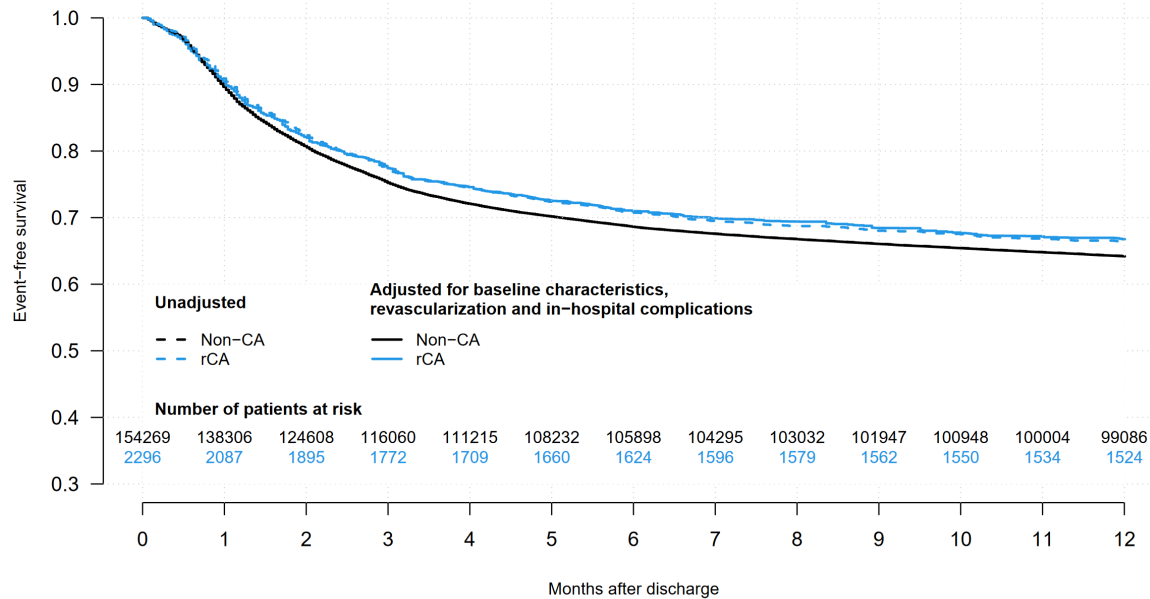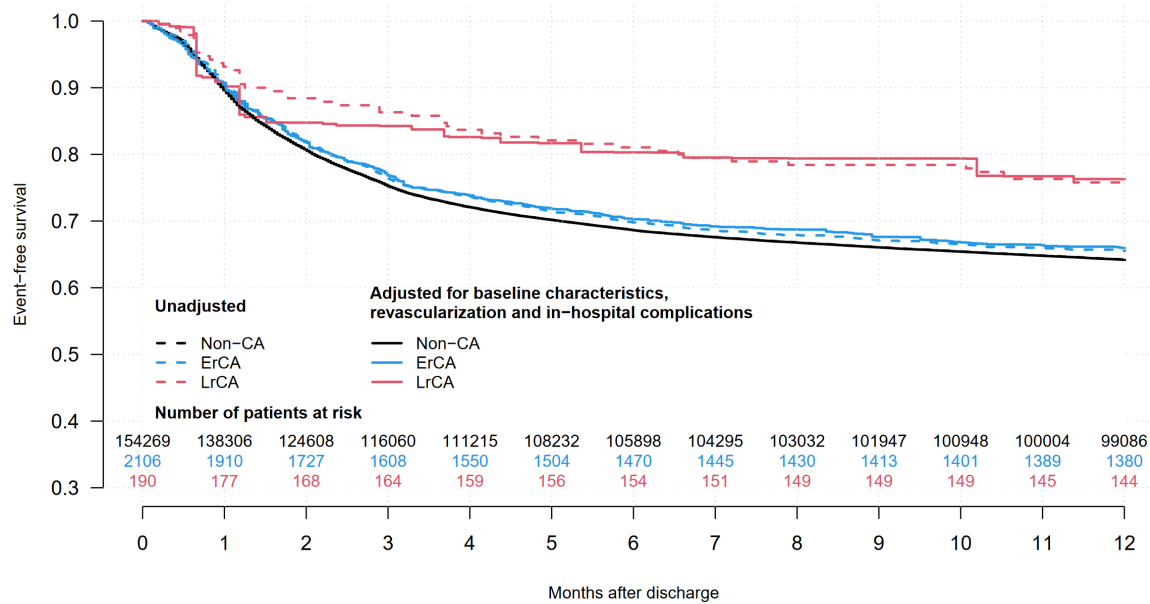

**Adjusted for baseline characteristics, revascularization, in-hospital complications, and treatment procedures**

|               | 1-year event-free (95% CI) | Hazard ratio (95% CI) | P value |
|---------------|----------------------------|-----------------------|---------|
| <b>Non-CA</b> | 0.642 (0.640 - 0.644)      | 1                     |         |
| <b>rCA</b>    | 0.660 (0.632 - 0.689)      | 0.94 (0.85 – 1.04)    | 0.25    |
| <b>ErCA</b>   | 0.653 (0.624 - 0.684)      | 0.96 (0.86 – 1.07)    | 0.488   |
| <b>LrCA</b>   | 0.731 (0.621 – 0.860)      | 0.71 (0.42 – 1.20)    | 0.206   |

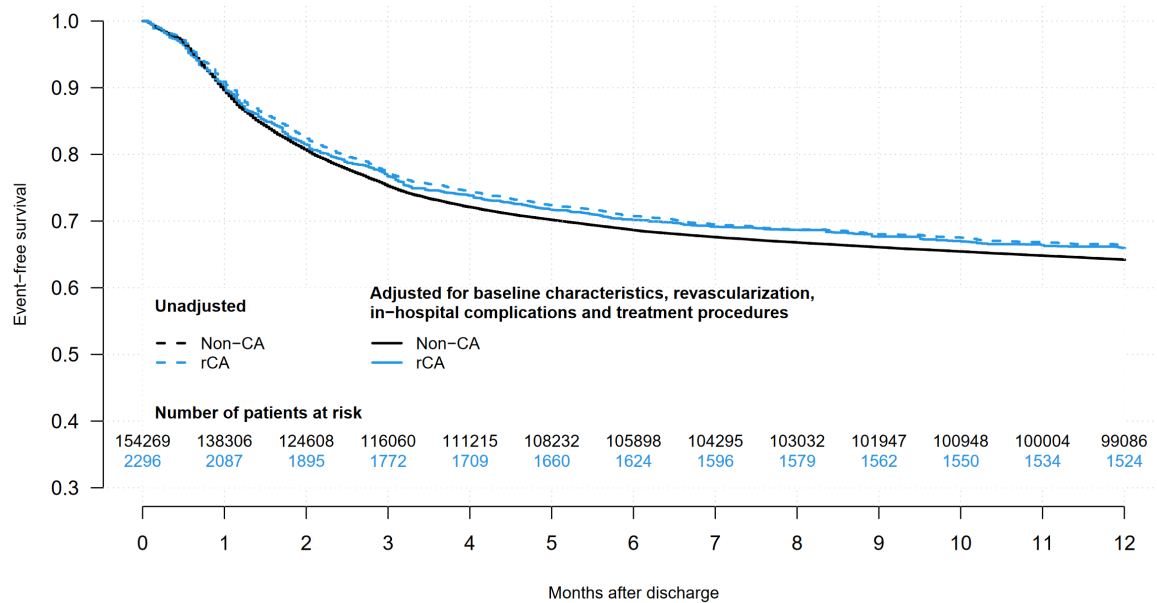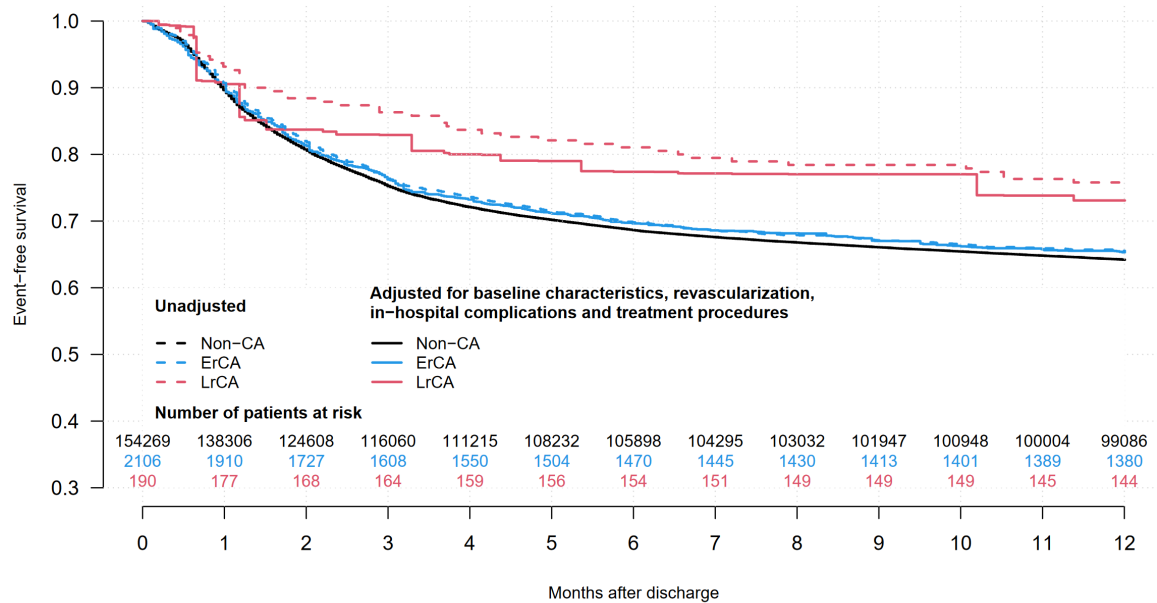

### Relative risk of 1-year re-hospitalization due to ischemic heart disease

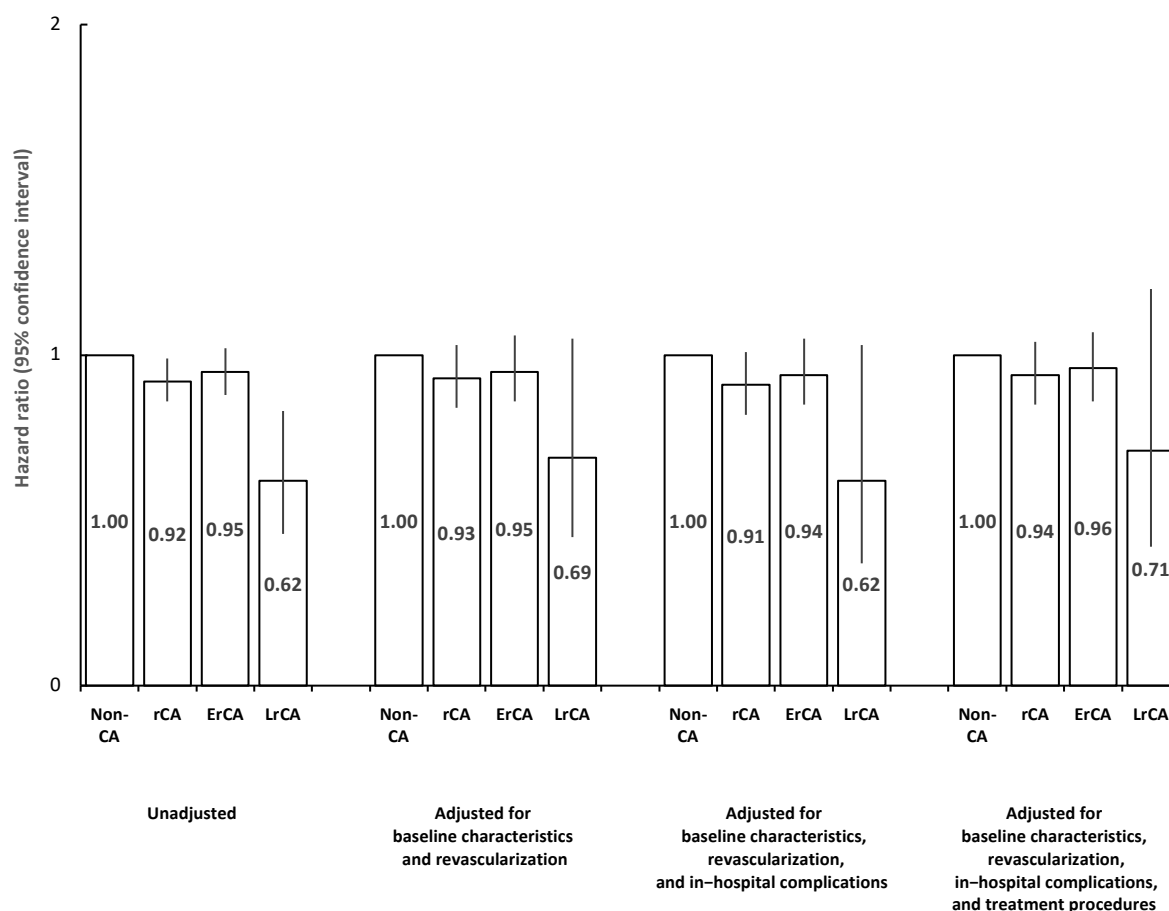

CA – cardiac arrest; rCA – resuscitated cardiac arrest; ErCA – early resuscitated cardiac arrest; LrCA – late resuscitated cardiac arrest

## F) 1 year re-hospitalization due to heart failure

### Unadjusted

|               | 1-year event-free (95% CI) | Hazard ratio (95% CI) | P value |
|---------------|----------------------------|-----------------------|---------|
| <b>Non-CA</b> | 0.918 (0.917 - 0.919)      | 1                     |         |
| <b>rCA</b>    | 0.885 (0.873 - 0.899)      | 1.43 (1.27 – 1.62)    | <0.0001 |
| <b>ErCA</b>   | 0.819 (0.878 - 0.905)      | 1.36 (1.19 – 1.55)    | <0.0001 |
| <b>LrCA</b>   | 0.821 (0.768 – 0.877)      | 2.34 (1.67– 3.27)     | <0.0001 |

CI – confidence interval; CA – cardiac arrest; rCA – resuscitated cardiac arrest; ErCA – early resuscitated cardiac arrest; LrCA – late resuscitated cardiac arrest

### Adjusted for baseline characteristics and revascularization

|               | 1-year event-free (95% CI) | Hazard ratio (95% CI) | P value |
|---------------|----------------------------|-----------------------|---------|
| <b>Non-CA</b> | 0.918 (0.916 - 0.919)      | 1                     |         |
| <b>rCA</b>    | 0.898 (0.881 - 0.916)      | 1.26 (1.05– 1.51)     | 0.0153  |
| <b>ErCA</b>   | 0.898 (0.879 - 0.917)      | 1.26 (1.04 – 1.54)    | 0.0211  |
| <b>LrCA</b>   | 0.903 (0.855 – 0.955)      | 1.20 (0.69 – 2.09)    | 0.5234  |

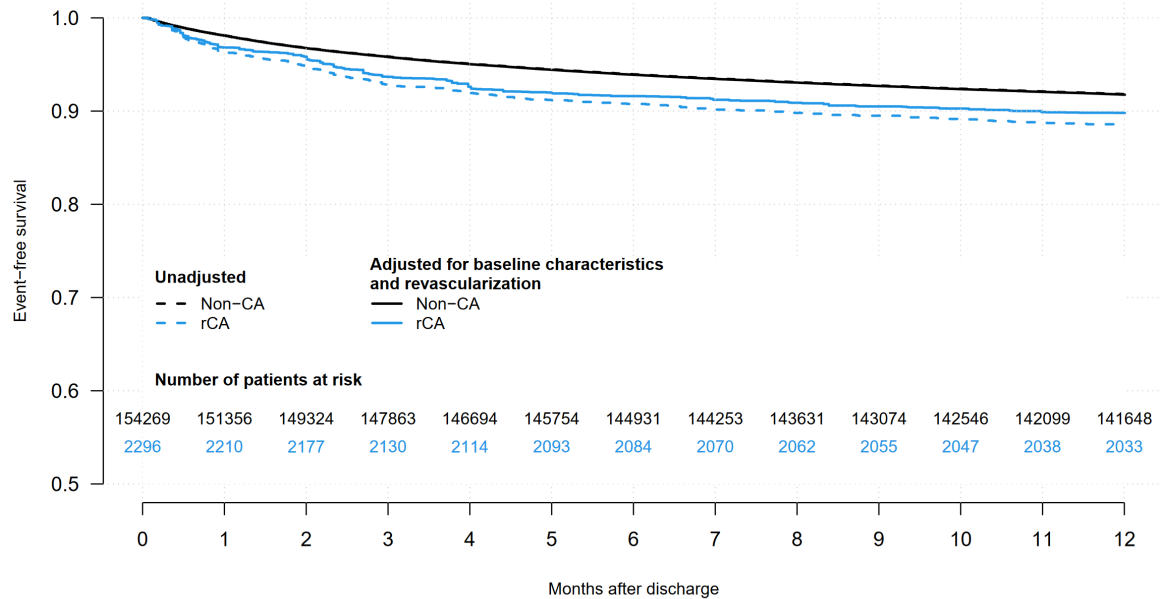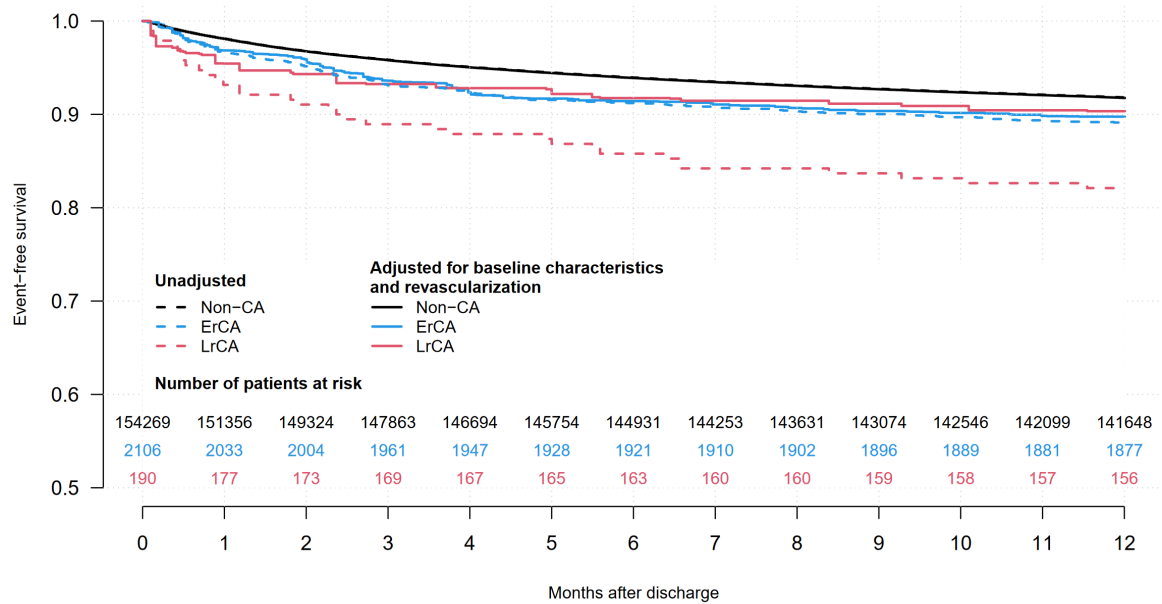

# Adjusted for baseline characteristics, revascularization, and in-hospital complications

|               | 1-year event-free (95% CI) | Hazard ratio (95% CI) | P value |
|---------------|----------------------------|-----------------------|---------|
| <b>Non-CA</b> | 0.917 (0.916 - 0.919)      | 1                     |         |
| <b>rCA</b>    | 0.899 (0.882 - 0.917)      | 1.24 (1.03 – 1.49)    | 0.0232  |
| <b>ErCA</b>   | 0.898 (0.879 - 0.917)      | 1.25 (1.03– 1.52)     | 0.0272  |
| <b>LrCA</b>   | 0.877 (0.813 – 0.946)      | 1.54 (0.86– 2.77)     | 0.1506  |

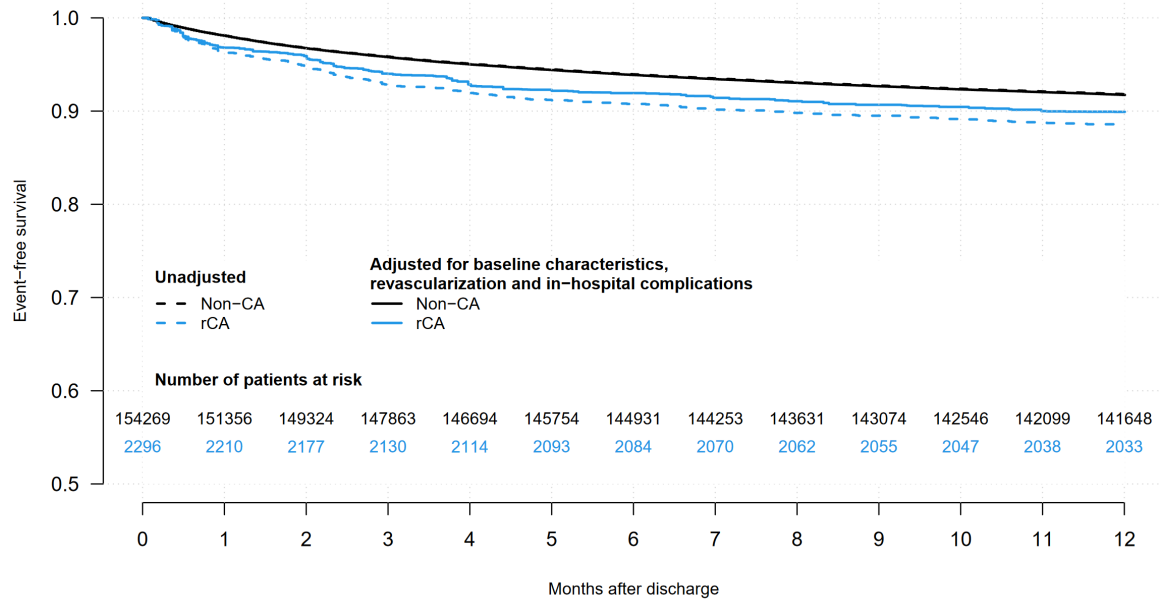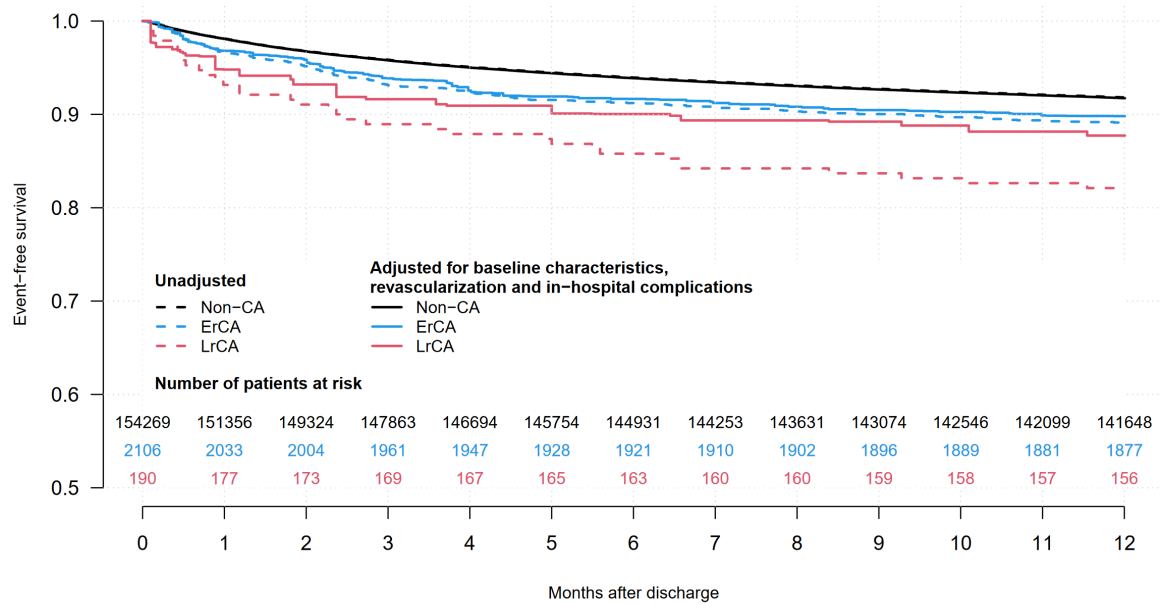

**Adjusted for baseline characteristics, revascularization, in-hospital complications, and treatment procedures**

|               | 1-year event-free (95% CI) | Hazard ratio (95% CI) | P value |
|---------------|----------------------------|-----------------------|---------|
| <b>Non-CA</b> | 0.917 (0.916 – 0.918)      | 1                     |         |
| <b>rCA</b>    | 0.902 (0.884 - 0.920)      | 1.20 (0.99 – 1.46)    | 0.0608  |
| <b>ErCA</b>   | 0.900 (0.881 - 0.920)      | 1.22 (0.99 – 1.49)    | 0.0607  |
| <b>LrCA</b>   | 0.881 (0.820 – 0.947)      | 1.47 (0.83 – 2.61)    | 0.1839  |

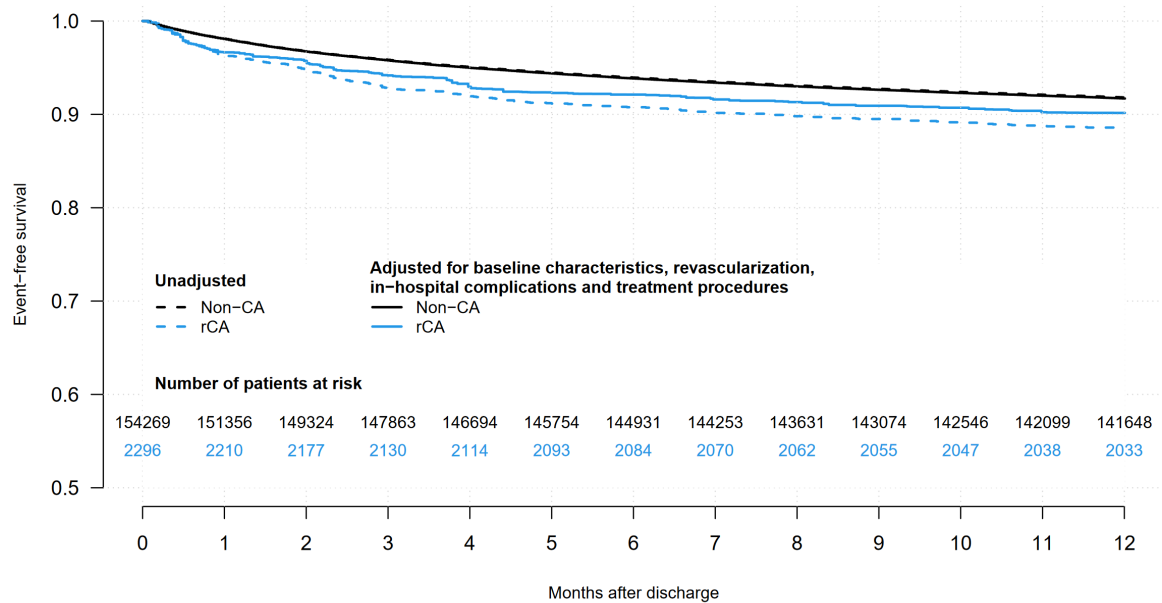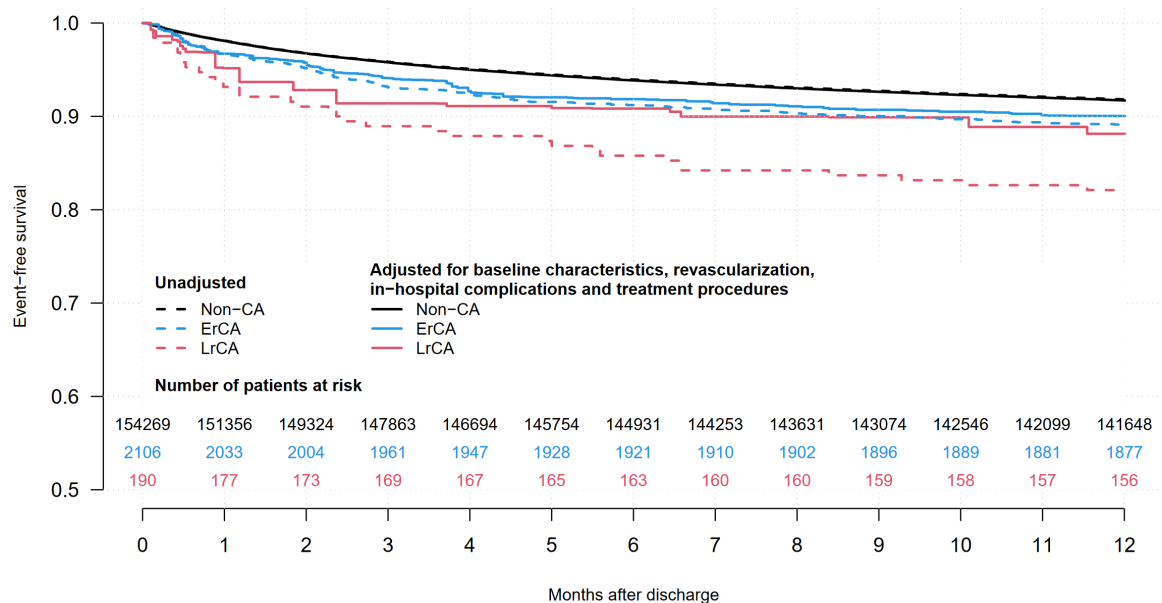

### Relative risk of 1-year re-hospitalization due to heart failure

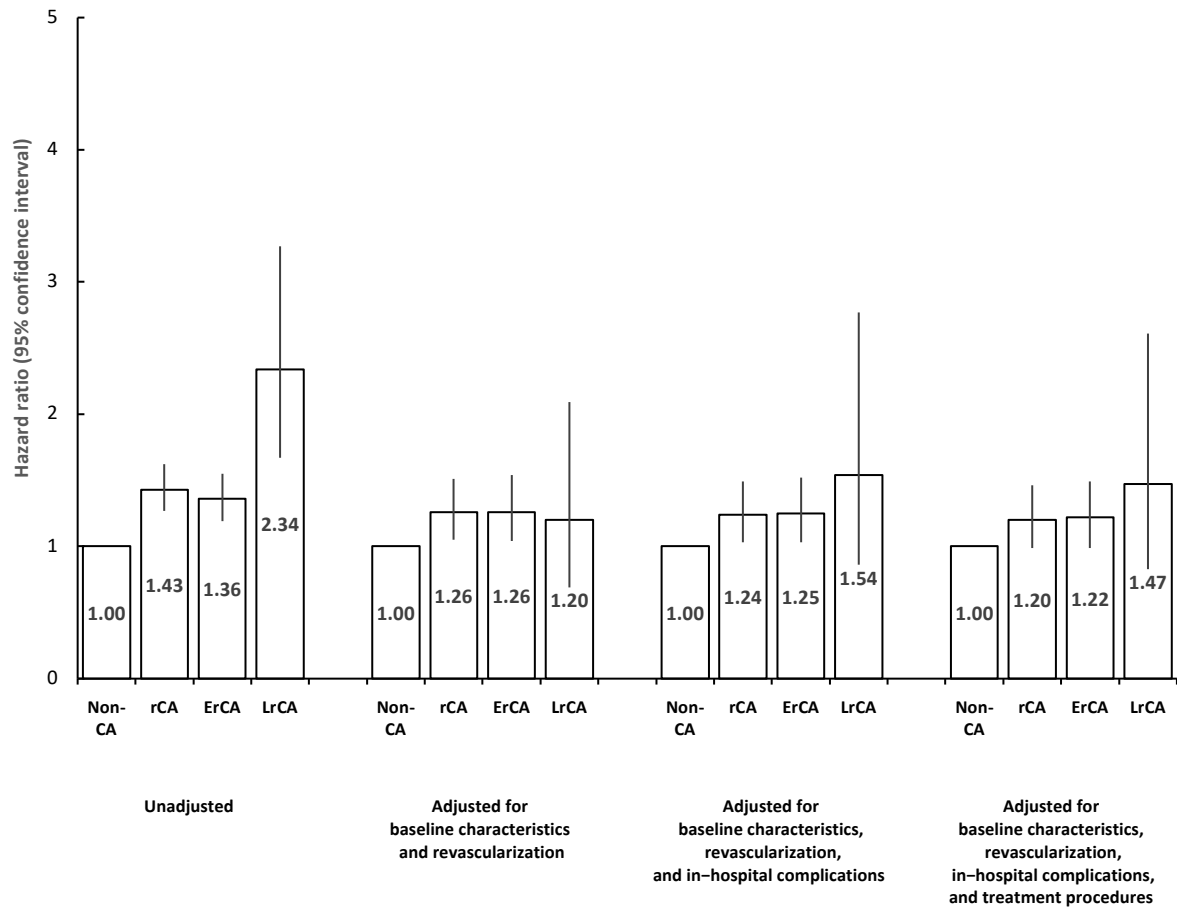

CA – cardiac arrest; rCA – resuscitated cardiac arrest; ErCA – early resuscitated cardiac arrest; LrCA – late resuscitated cardiac arrest



## G) 1 year re-hospitalization due to **cardiovascular reason**

### Unadjusted

|               | 1-year event-free (95% CI) | Hazard ratio (95% CI) | P value |
|---------------|----------------------------|-----------------------|---------|
| <b>Non-CA</b> | 0.536 (0.533 - 0.538)      | 1                     |         |
| <b>rCA</b>    | 0.521 (0.501 - 0.542)      | 1.05 (0.99 – 1.11)    | 0.121   |
| <b>ErCA</b>   | 0.523 (0.502 - 0.545)      | 1.04 (0.98 – 1.10)    | 0.201   |
| <b>LrCA</b>   | 0.500 (0.434 – 0.576)      | 1.13 (0.92 – 1.38)    | 0.246   |

CI – confidence interval; CA – cardiac arrest; rCA – resuscitated cardiac arrest; ErCA – early resuscitated cardiac arrest; LrCA – late resuscitated cardiac arrest

### Adjusted for baseline characteristics and revascularization

|               | 1-year event-free (95% CI) | Hazard ratio (95% CI) | P value |
|---------------|----------------------------|-----------------------|---------|
| <b>Non-CA</b> | 0.535 (0.533 - 0.538)      | 1                     |         |
| <b>rCA</b>    | 0.526 (0.498 - 0.555)      | 1.03 (0.95 – 1.12)    | 0.455   |
| <b>ErCA</b>   | 0.525 (0.495 - 0.556)      | 1.04 (0.95 – 1.13)    | 0.431   |
| <b>LrCA</b>   | 0.533 (0.436 – 0.650)      | 1.05 (0.76 – 1.47)    | 0.753   |

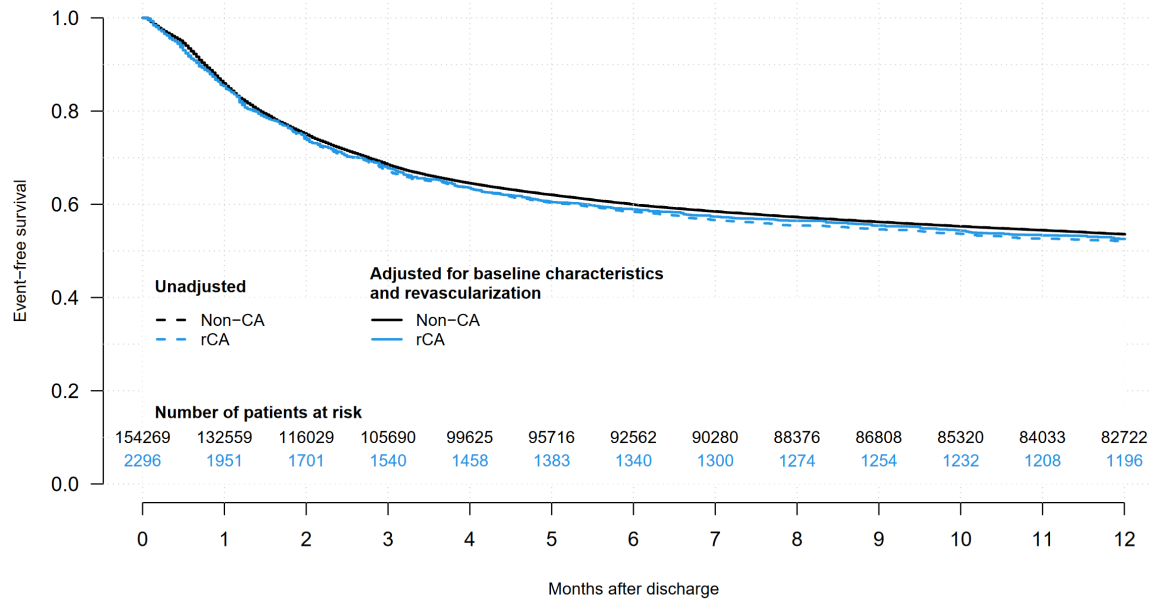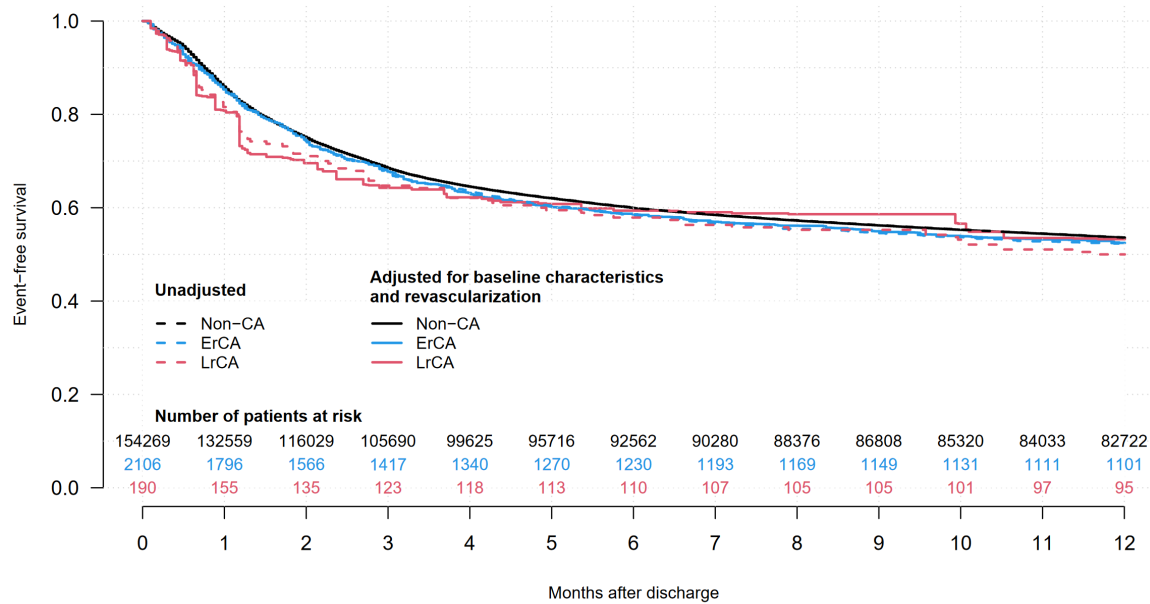

# Adjusted for baseline characteristics, revascularization, and in-hospital complications

|               | 1-year event-free (95% CI) | Hazard ratio (95% CI) | P value |
|---------------|----------------------------|-----------------------|---------|
| <b>Non-CA</b> | 0.535 (0.533 - 0.538)      | 1                     |         |
| <b>rCA</b>    | 0.528 (0.499 - 0.558)      | 1.03 (0.94 – 1.12)    | 0.512   |
| <b>ErCA</b>   | 0.526 (0.496 - 0.558)      | 1.03 (0.94 – 1.13)    | 0.481   |
| <b>LrCA</b>   | 0.495 (0.390 – 0.627)      | 1.20 (0.84 – 1.72)    | 0.309   |

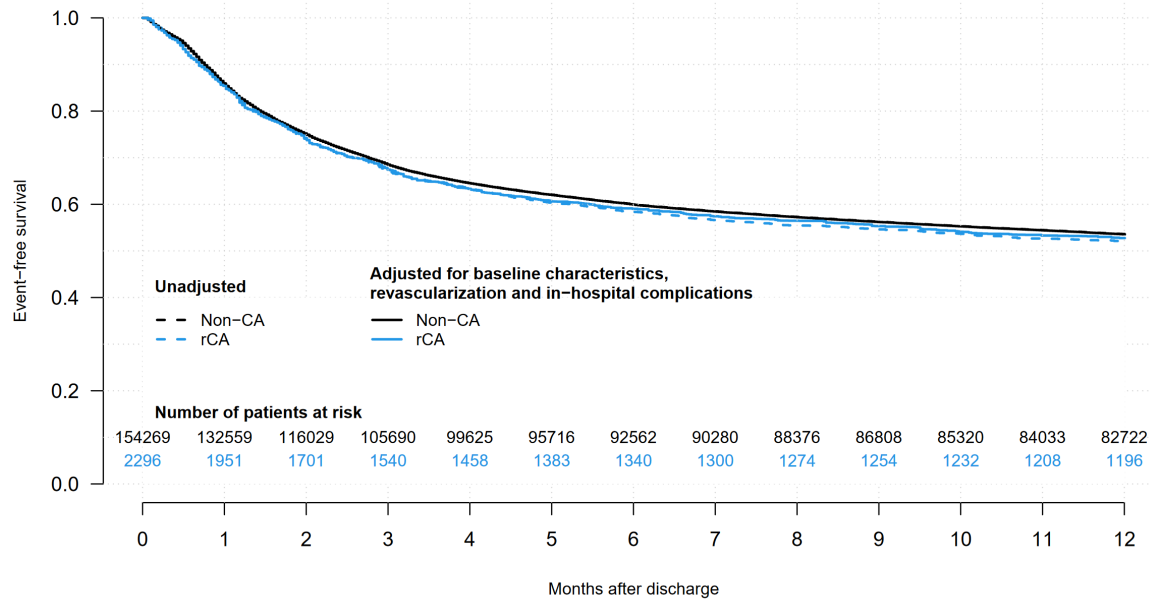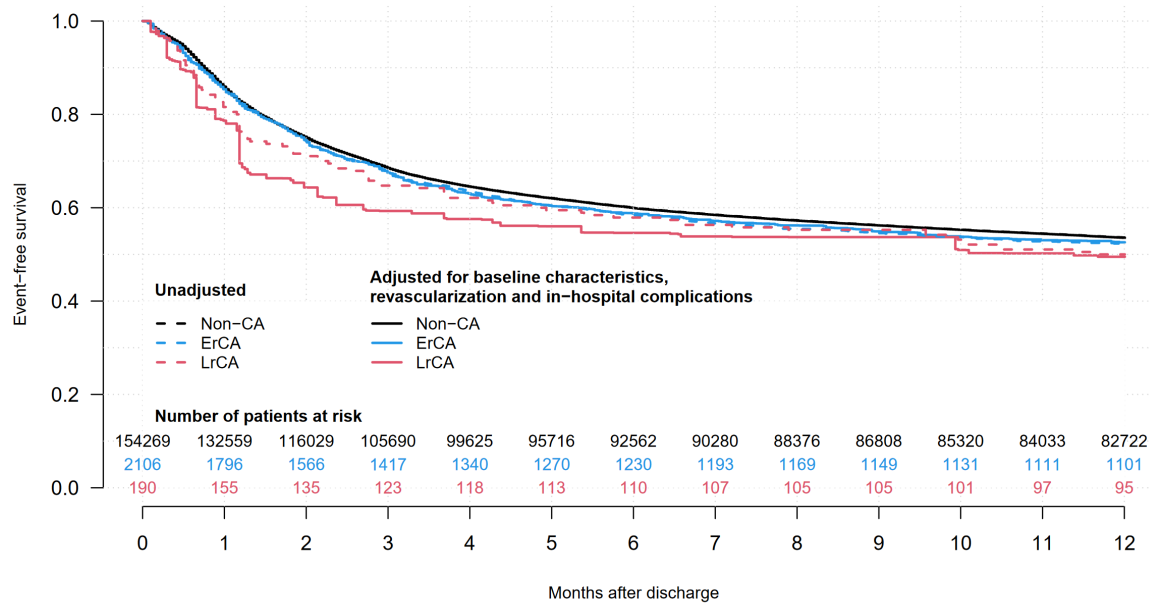

**Adjusted for baseline characteristics, revascularization, in-hospital complications, and treatment procedures**

|               | 1-year event-free (95% CI) | Hazard ratio (95% CI) | P value |
|---------------|----------------------------|-----------------------|---------|
| <b>Non-CA</b> | 0.535 (0.533 - 0.538)      | 1                     |         |
| <b>rCA</b>    | 0.519 (0.490 - 0.550)      | 1.06 (0.97 – 1.16)    | 0.226   |
| <b>ErCA</b>   | 0.519 (0.489 - 0.552)      | 1.05 (0.96 – 1.15)    | 0.255   |
| <b>LrCA</b>   | 0.451 (0.341 – 0.597)      | 1.33 (0.93 – 1.91)    | 0.116   |

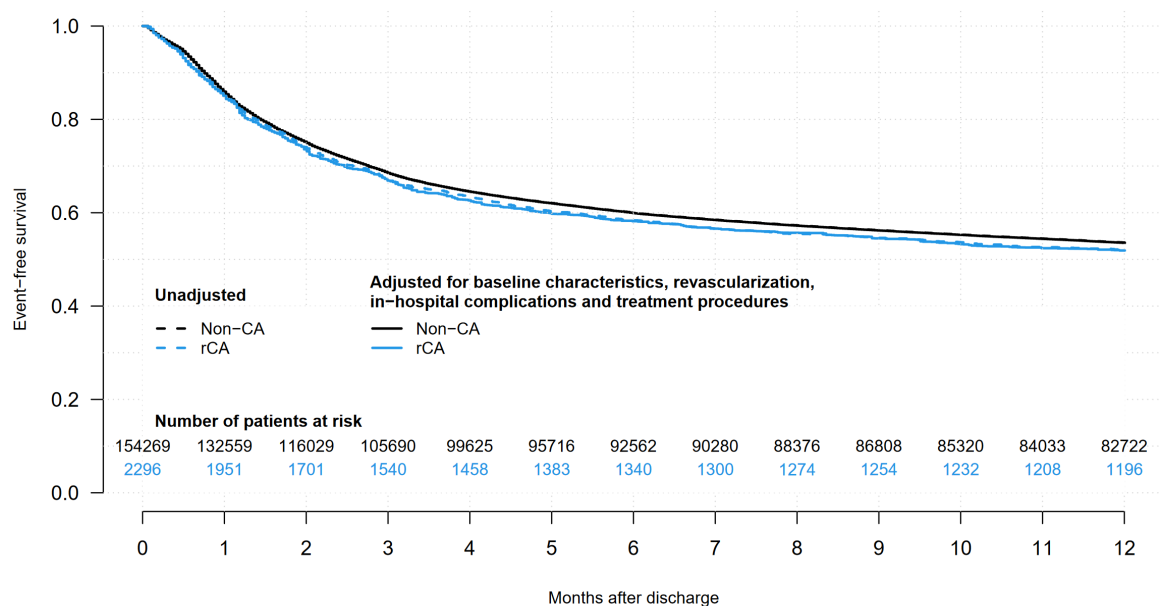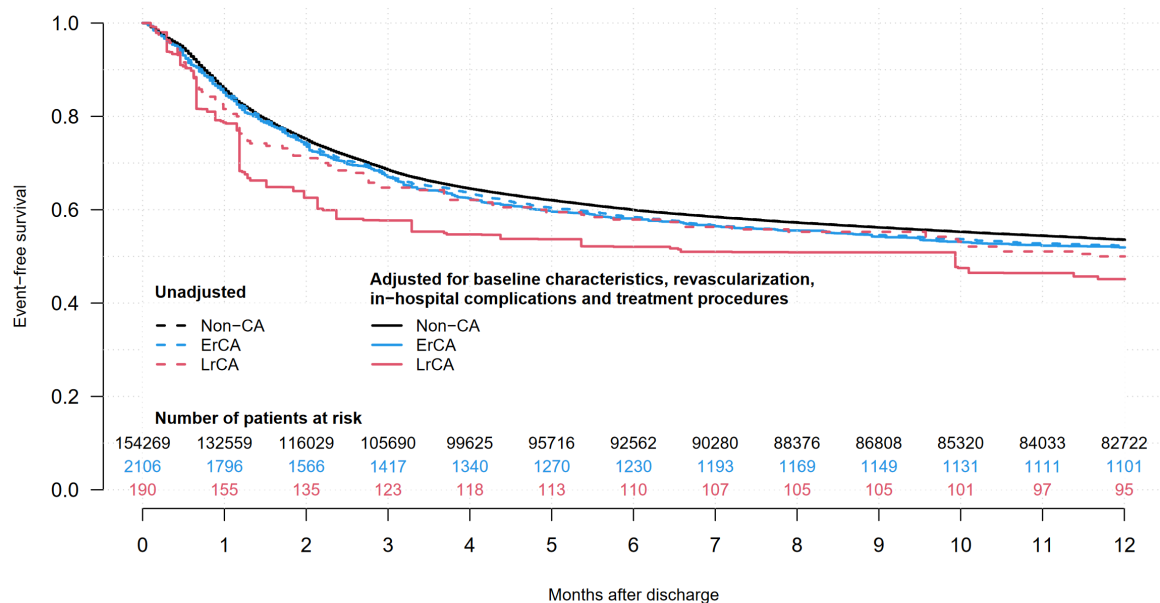

### Relative risk of 1-year re-hospitalization due to cardiovascular reason

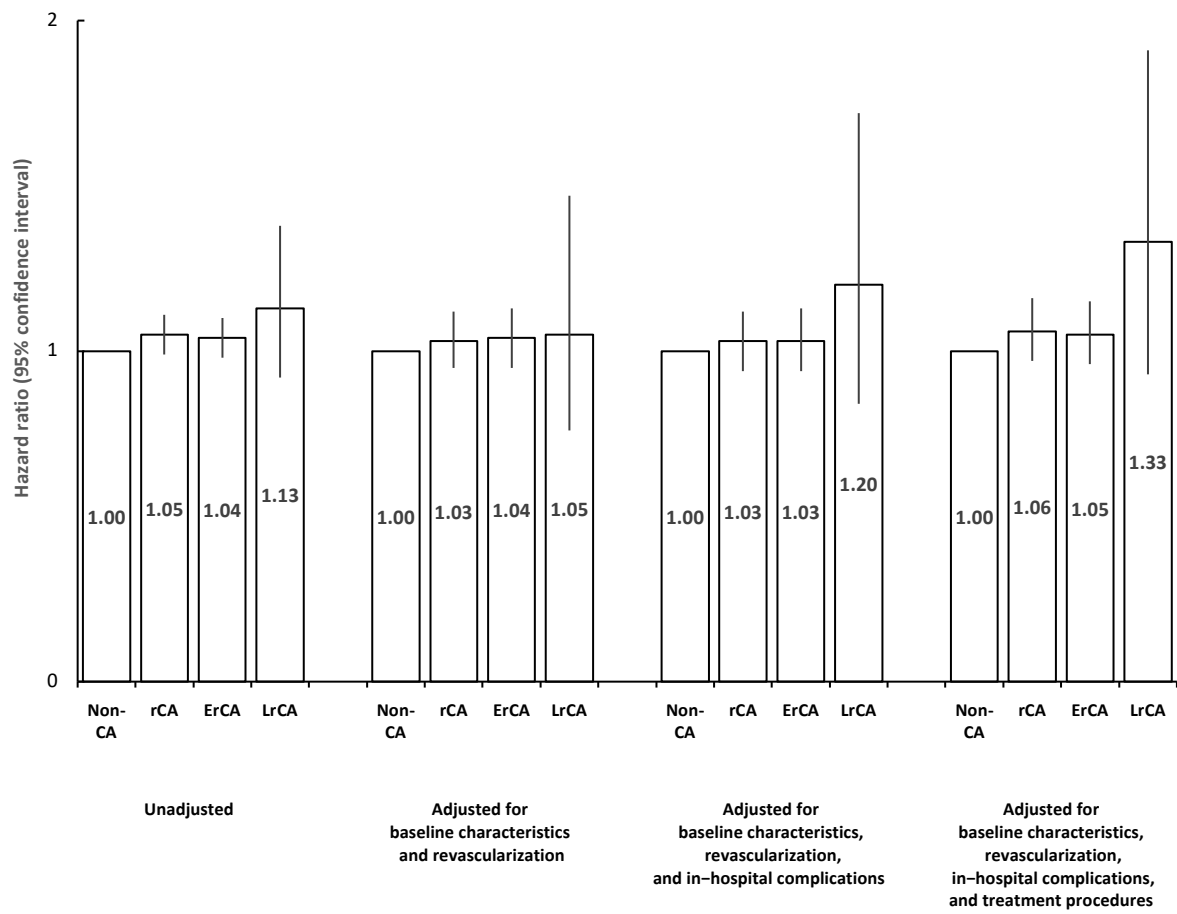

CA – cardiac arrest; rCA – resuscitated cardiac arrest; ErCA – early resuscitated cardiac arrest; LrCA – late resuscitated cardiac arrest

## H) 1 year re-hospitalization due to **any reason**

### Unadjusted

|               | 1-year event-free (95% CI) | Hazard ratio (95% CI) | P value |
|---------------|----------------------------|-----------------------|---------|
| <b>Non-CA</b> | 0.427 (0.424 - 0.429)      | 1                     |         |
| <b>rCA</b>    | 0.409 (0.389 - 0.430)      | 1.06 (1.00 – 1.11)    | 0.0452  |
| <b>ErCA</b>   | 0.415 (0.394 - 0.436)      | 1.04 (0.98 – 1.10)    | 0.22958 |
| <b>LrCA</b>   | 0.347 (0.286 – 0.422)      | 1.33 (1.11 – 1.58)    | 0.00162 |

CI – confidence interval; CA – cardiac arrest; rCA – resuscitated cardiac arrest; ErCA – early resuscitated cardiac arrest; LrCA – late resuscitated cardiac arrest

### Adjusted for baseline characteristics and revascularization

|               | 1-year event-free (95% CI) | Hazard ratio (95% CI) | P value |
|---------------|----------------------------|-----------------------|---------|
| <b>Non-CA</b> | 0.426 (0.424 - 0.429)      | 1                     |         |
| <b>rCA</b>    | 0.427 (0.399 - 0.456)      | 1.01 (0.94 – 1.10)    | 0.755   |
| <b>ErCA</b>   | 0.430 (0.401 - 0.461)      | 1.00 (0.92 – 1.08)    | 0.986   |
| <b>LrCA</b>   | 0.389 (0.298 – 0.509)      | 1.19 (0.89 – 1.60)    | 0.235   |

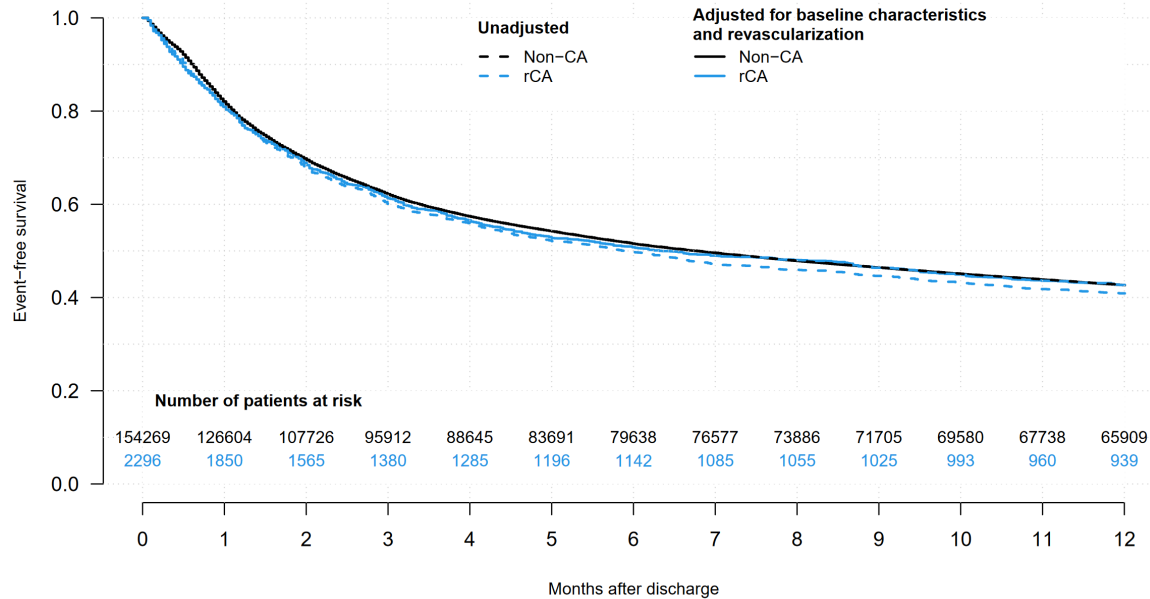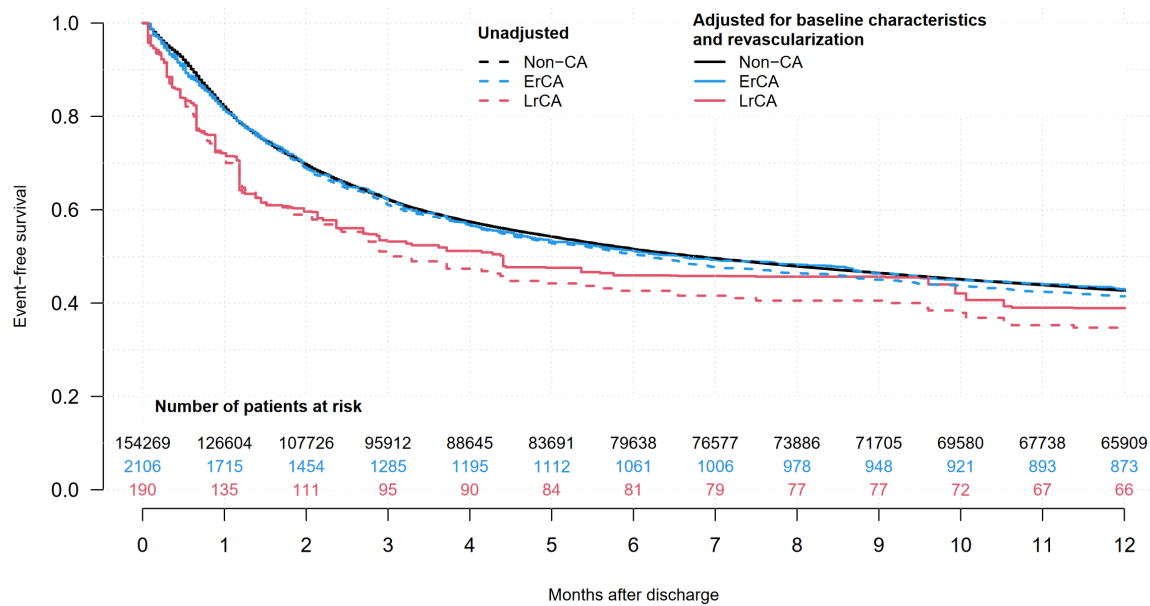

### Adjusted for baseline characteristics, revascularization, and in-hospital complications

|               | 1-year event-free (95% CI) | Hazard ratio (95% CI) | P value |
|---------------|----------------------------|-----------------------|---------|
| <b>Non-CA</b> | 0.426 (0.424 - 0.429)      | 1                     |         |
| <b>rCA</b>    | 0.428 (0.400 - 0.459)      | 1.00 (0.93 – 1.09)    | 0.912   |
| <b>ErCA</b>   | 0.431 (0.401 - 0.463)      | 0.99 (0.92 – 1.08)    | 0.8825  |
| <b>LrCA</b>   | 0.338 (0.249 – 0.457)      | 1.37 (1.03 – 1.82)    | 0.0322  |

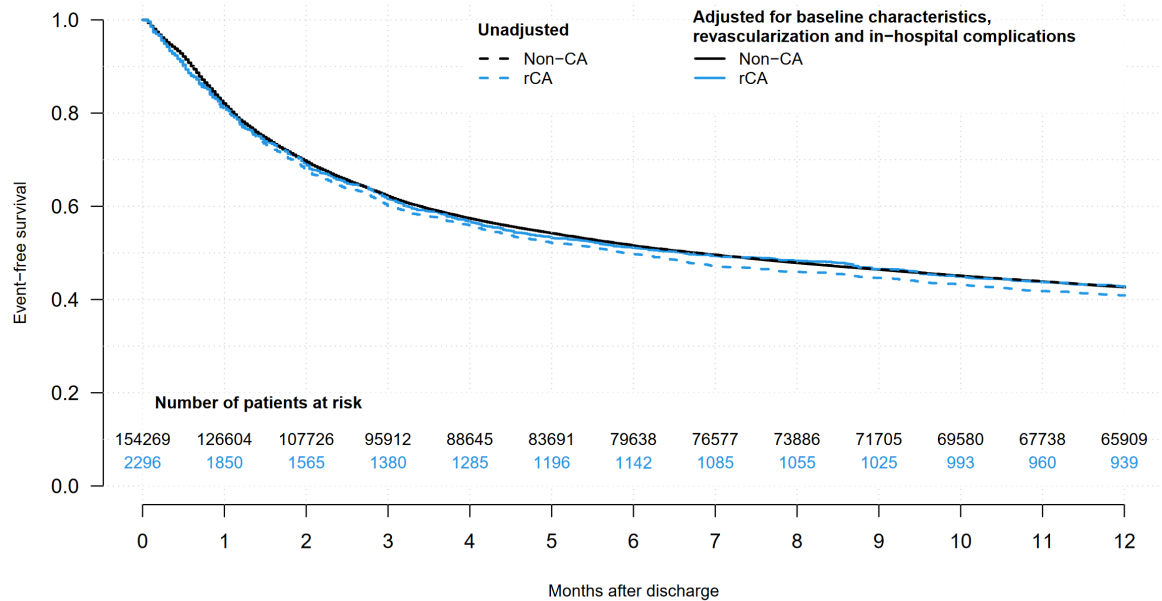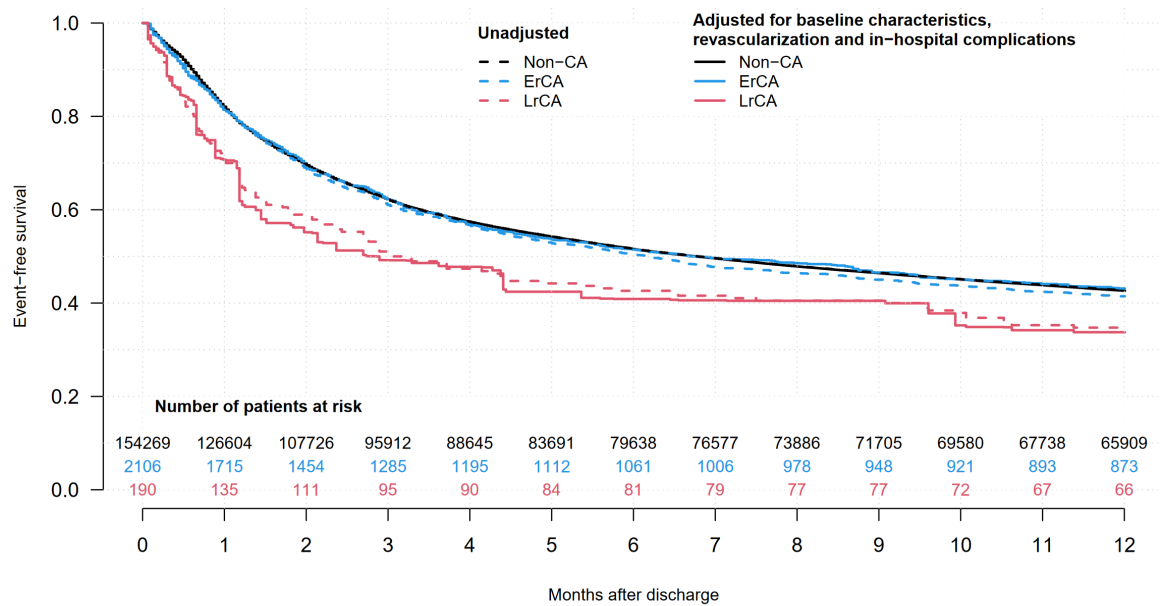



**Adjusted for baseline characteristics, revascularization, in-hospital complications, and treatment procedures**

|               | 1-year event-free (95% CI) | Hazard ratio (95% CI) | P value |
|---------------|----------------------------|-----------------------|---------|
| <b>Non-CA</b> | 0.426 (0.424 - 0.429)      | 1                     |         |
| <b>rCA</b>    | 0.423 (0.395 - 0.454)      | 1.02 (0.94 – 1.11)    | 0.624   |
| <b>ErCA</b>   | 0.882 (0.860 - 0.905)      | 1.01 (0.93 – 1.10)    | 0.8297  |
| <b>LrCA</b>   | 0.828 (0.751 – 0.913)      | 1.42 (1.05 – 1.90)    | 0.0217  |

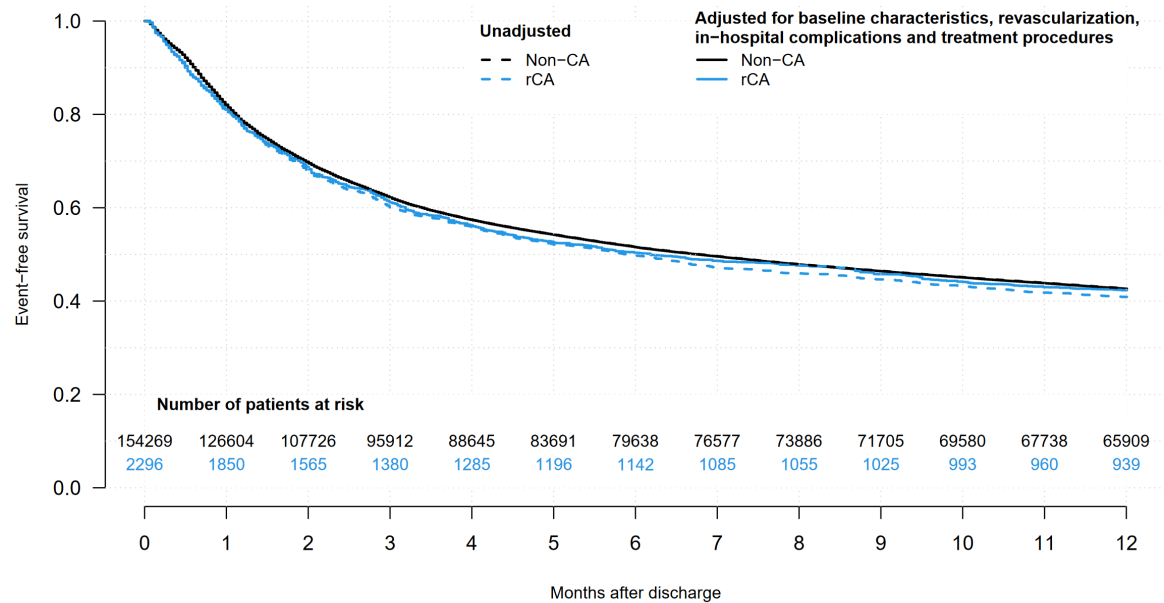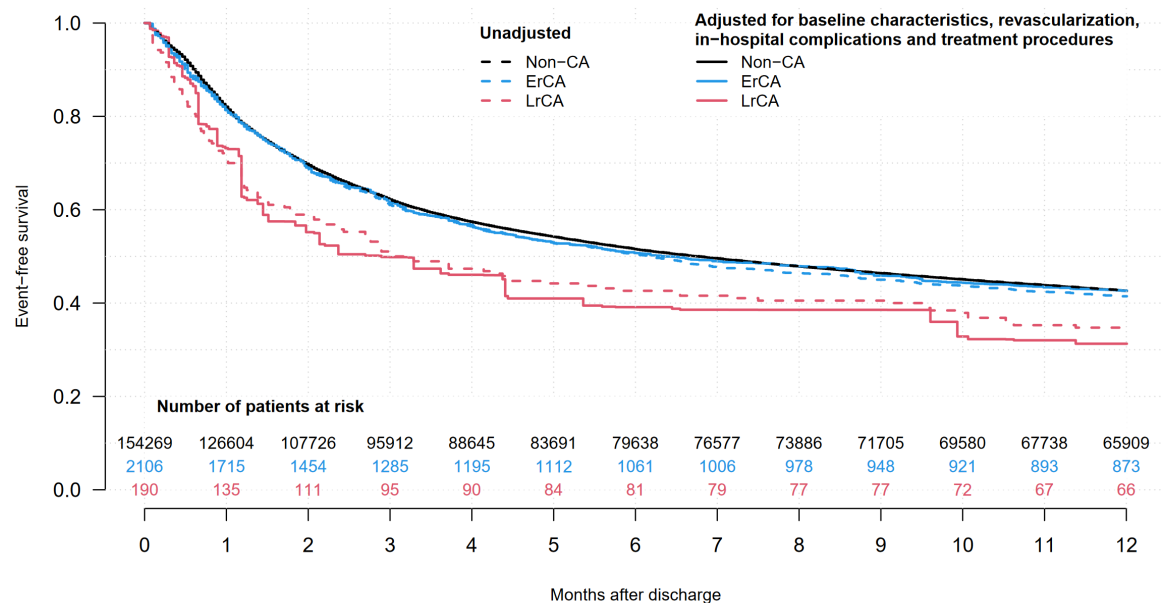

### Relative risk of 1-year re-hospitalization due to any reason

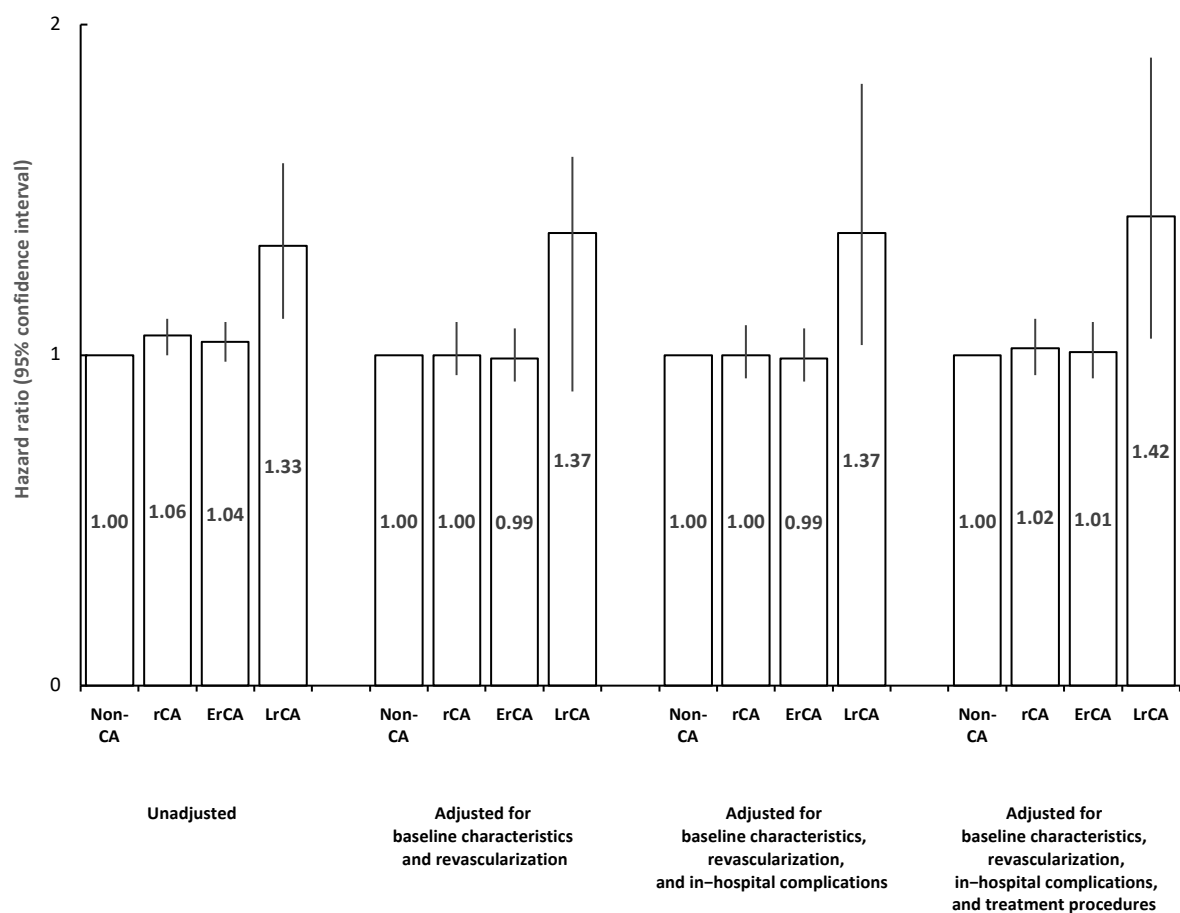

CA – cardiac arrest; rCA – resuscitated cardiac arrest; ErCA – early resuscitated cardiac arrest; LrCA – late resuscitated cardiac arrest

## I) 1 year re-hospitalization with coronary angiography

### Unadjusted

|               | 1-year event-free (95% CI) | Hazard ratio (95% CI) | P value |
|---------------|----------------------------|-----------------------|---------|
| <b>Non-CA</b> | 0.743 (0.740 - 0.745)      | 1                     |         |
| <b>rCA</b>    | 0.756 (0.739 - 0.774)      | 0.94 (0.86 – 1.02)    | 0.121   |
| <b>ErCA</b>   | 0.749 (0.731 - 0.768)      | 0.97 (0.89 – 1.06)    | 0.47093 |
| <b>LrCA</b>   | 0.837 (0.786 – 0.891)      | 0.59 (0.42 – 0.84)    | 0.00371 |

CI – confidence interval; CA – cardiac arrest; rCA – resuscitated cardiac arrest; ErCA – early resuscitated cardiac arrest; LrCA – late resuscitated cardiac arrest

### Adjusted for baseline characteristics and revascularization

|               | 1-year event-free (95% CI) | Hazard ratio (95% CI) | P value |
|---------------|----------------------------|-----------------------|---------|
| <b>Non-CA</b> | 0.743 (0.741 - 0.745)      | 1                     |         |
| <b>rCA</b>    | 0.774 (0.751 - 0.797)      | 0.87 (0.77 – 0.97)    | 0.0152  |
| <b>ErCA</b>   | 0.768 (0.743 - 0.793)      | 0.89 (0.79 – 1.01)    | 0.0663  |
| <b>LrCA</b>   | 0.818 (0.743 – 0.901)      | 0.68 (0.42 – 1.10)    | 0.1162  |

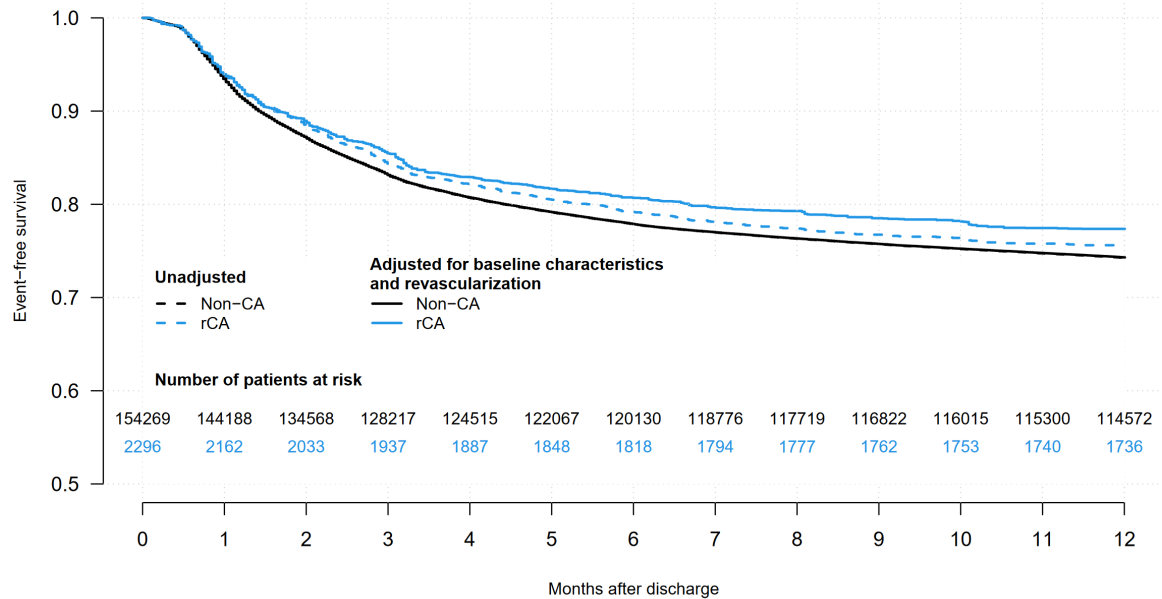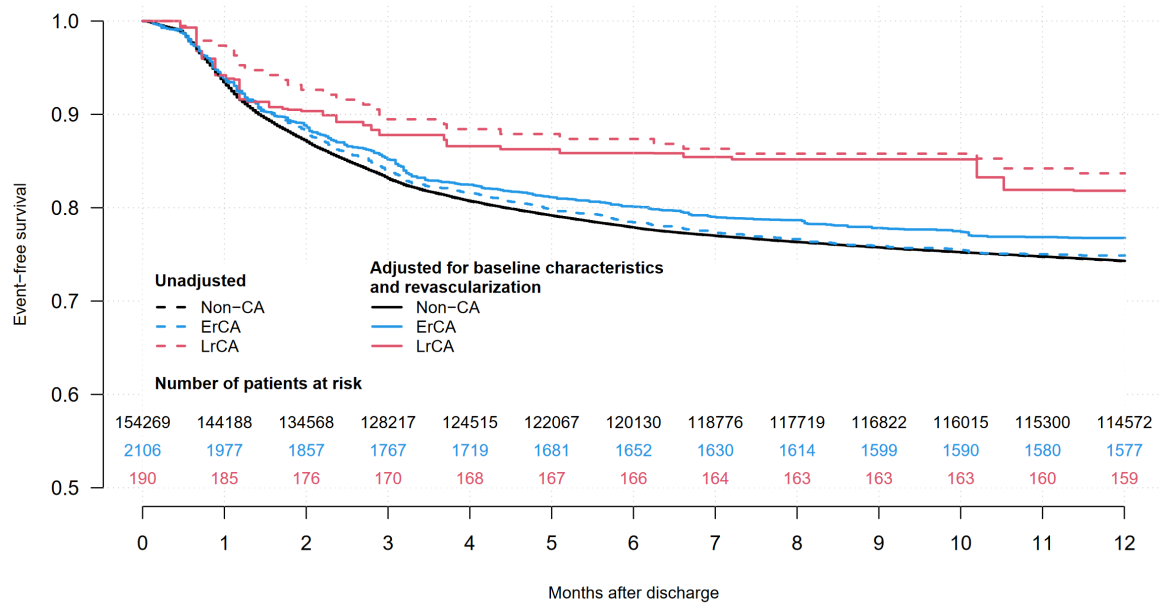

### Adjusted for baseline characteristics, revascularization, and in-hospital complications

|               | 1-year event-free (95% CI) | Hazard ratio (95% CI) | P value |
|---------------|----------------------------|-----------------------|---------|
| <b>Non-CA</b> | 0.743 (0.741 - 0.745)      | 1                     |         |
| <b>rCA</b>    | 0.770 (0.747 - 0.795)      | 0.88 (0.78 – 0.99)    | 0.0391  |
| <b>ErCA</b>   | 0.764 (0.739 - 0.790)      | 0.91 (0.80 – 1.03)    | 0.136   |
| <b>LrCA</b>   | 0.832 (0.744 – 0.930)      | 0.62 (0.34 – 1.15)    | 0.128   |

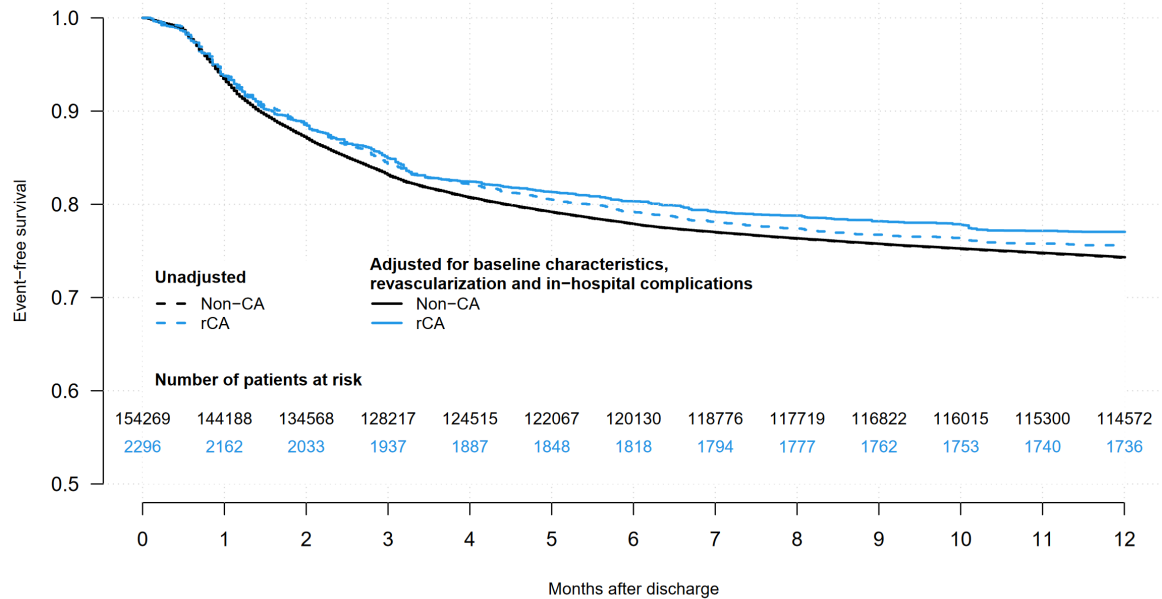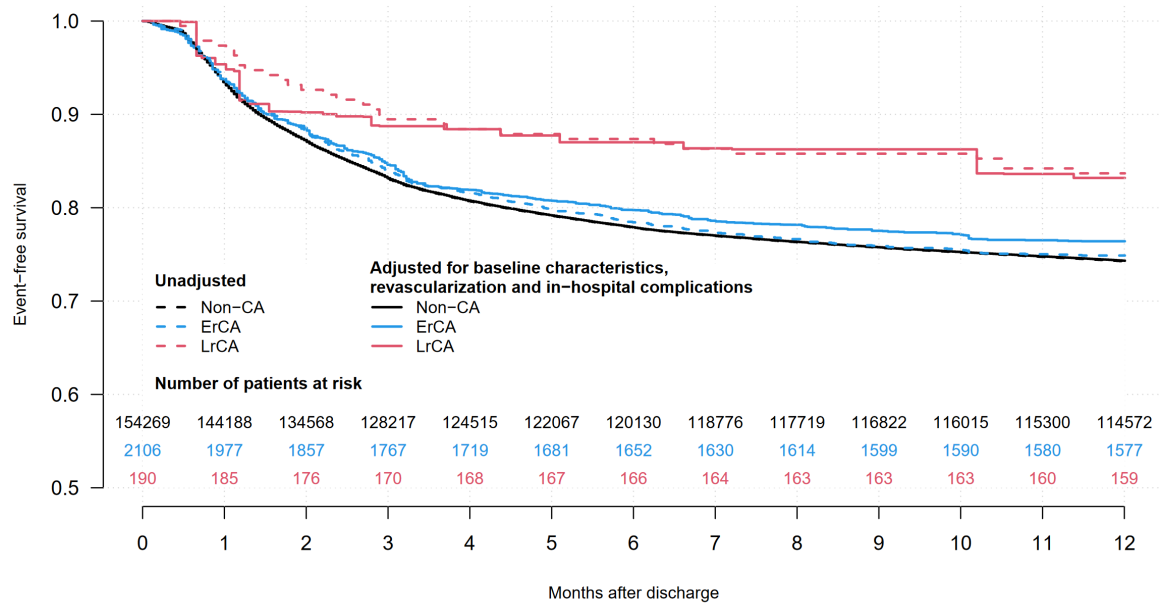

**Adjusted for baseline characteristics, revascularization, in-hospital complications, and treatment procedures**

|               | 1-year event-free (95% CI) | Hazard ratio (95% CI) | P value |
|---------------|----------------------------|-----------------------|---------|
| <b>Non-CA</b> | 0.743 (0.741 - 0.746)      | 1                     |         |
| <b>rCA</b>    | 0.765 (0.741 - 0.790)      | 0.91 (0.80 – 1.02)    | 0.107   |
| <b>ErCA</b>   | 0.759 (0.734 - 0.786)      | 0.93 (0.82 – 1.06)    | 0.269   |
| <b>LrCA</b>   | 0.826 (0.729 – 0.936)      | 0.65 (0.34 – 1.24)    | 0.190   |

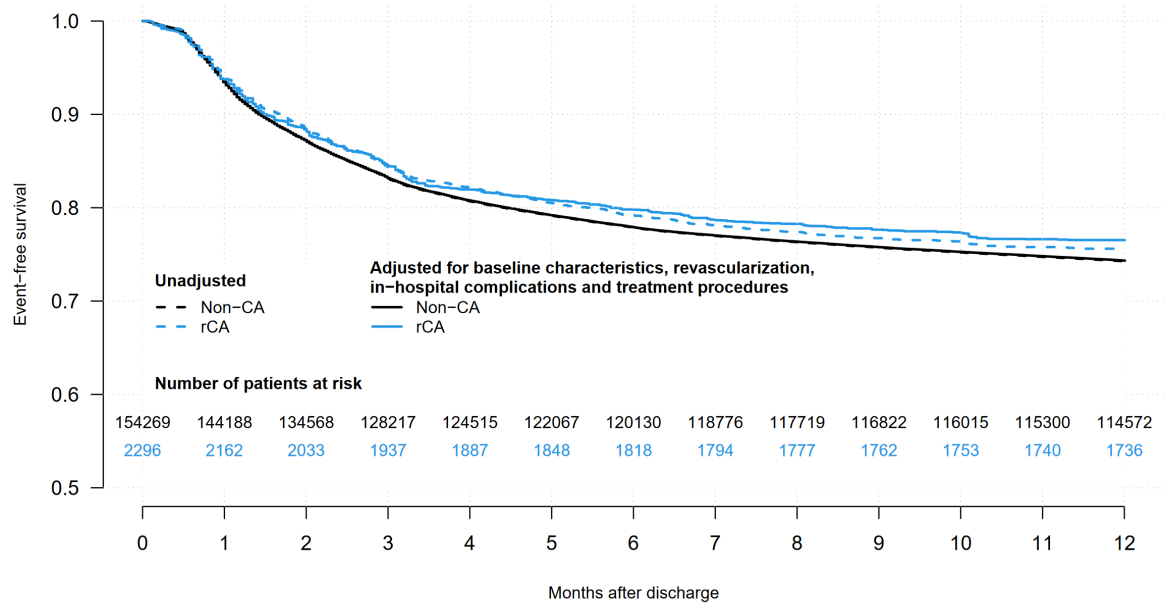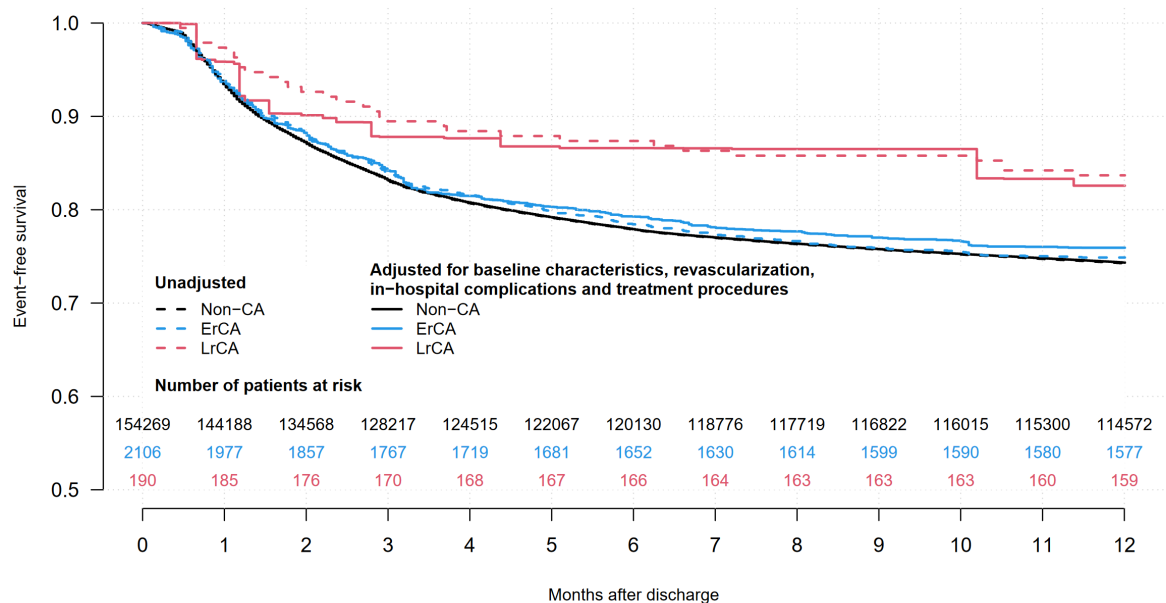

### Relative risk of 1-year re-hospitalization with coronary angiography

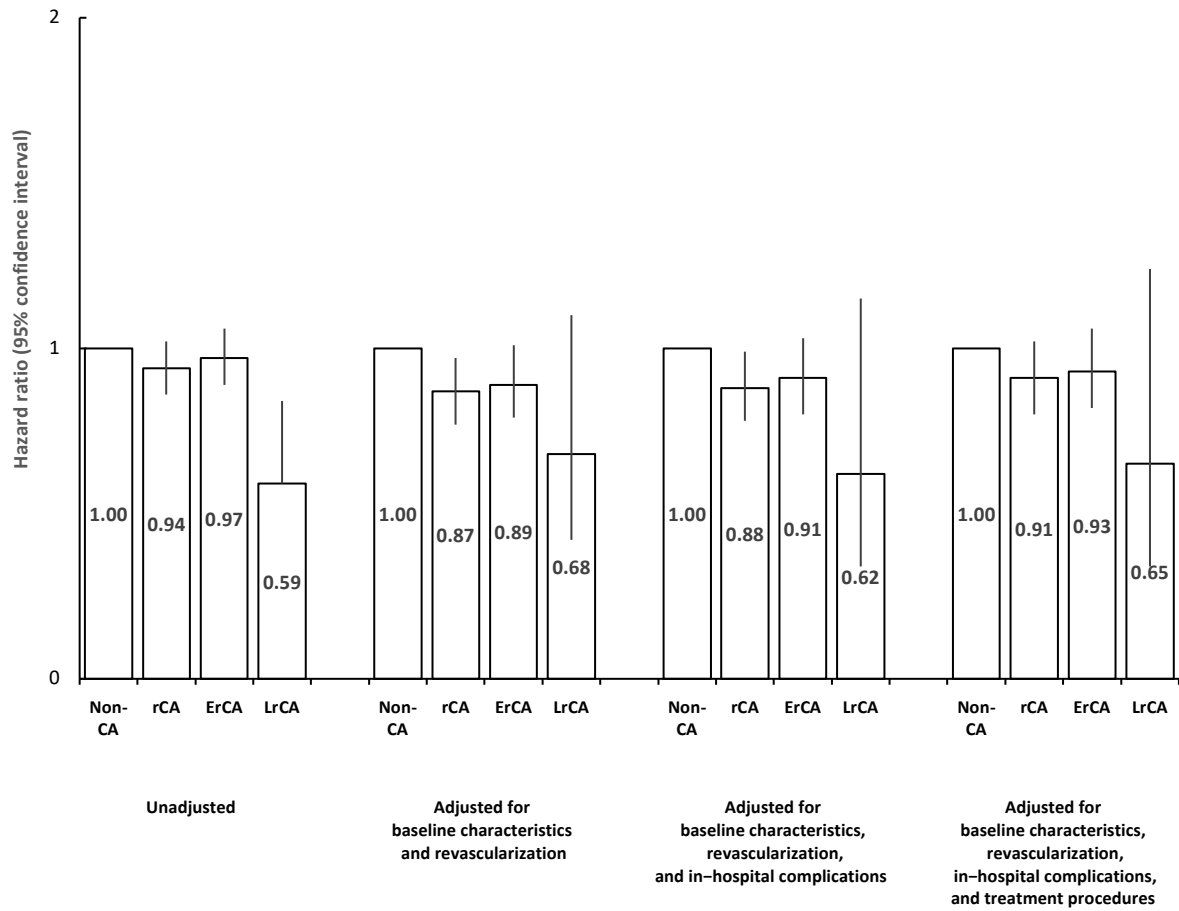

CA – cardiac arrest; rCA – resuscitated cardiac arrest; ErCA – early resuscitated cardiac arrest; LrCA – late resuscitated cardiac arrest

## J) 1 year re-hospitalization with **PCI or CABG**

### Unadjusted

|               | 1-year event-free (95% CI) | Hazard ratio (95% CI) | P value |
|---------------|----------------------------|-----------------------|---------|
| <b>Non-CA</b> | 0.751 (0.749 - 0.753)      | 1                     |         |
| <b>rCA</b>    | 0.790 (0.774 - 0.807)      | 0.82 (0.75 – 0.90)    | <0.0001 |
| <b>ErCA</b>   | 0.782 (0.765 - 0.800)      | 0.86 (0.78 – 0.94)    | 0.00101 |
| <b>LrCA</b>   | 0.879 (0.834 – 0.927)      | 0.45 (0.30– 0.67)     | 0.00012 |

CI – confidence interval; CA – cardiac arrest; rCA – resuscitated cardiac arrest; ErCA – early resuscitated cardiac arrest; LrCA – late resuscitated cardiac arrest



### Adjusted for baseline characteristics and revascularization

|               | 1-year event-free (95% CI) | Hazard ratio (95% CI) | P value |
|---------------|----------------------------|-----------------------|---------|
| <b>Non-CA</b> | 0.751 (0.749 - 0.754)      | 1                     |         |
| <b>rCA</b>    | 0.789 (0.766 - 0.812)      | 0.83 (0.74– 0.94)     | 0.0041  |
| <b>ErCA</b>   | 0.783 (0.759 - 0.808)      | 0.86 (0.75 – 0.98)    | 0.0193  |
| <b>LrCA</b>   | 0.839 (0.764 – 0.920)      | 0.62 (0.36 – 1.05)    | 0.0748  |

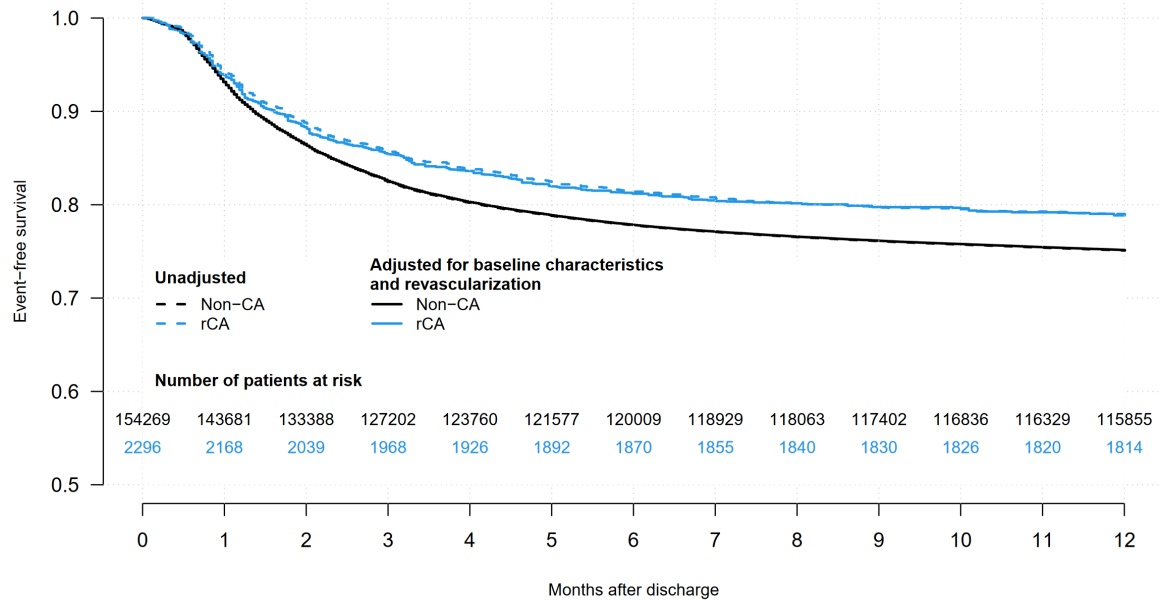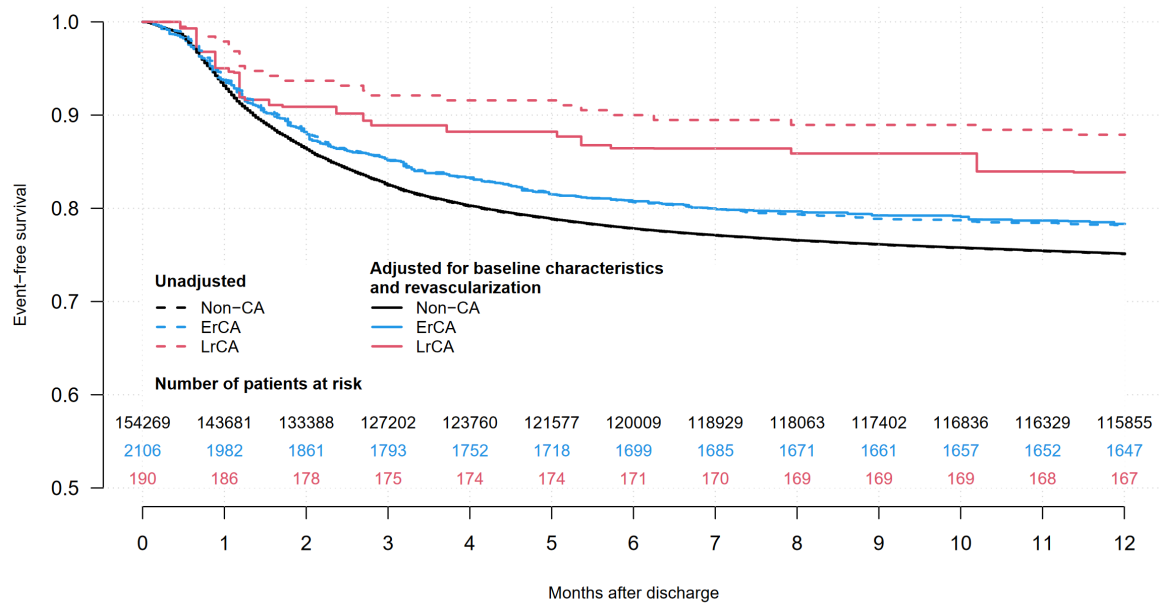

# Adjusted for baseline characteristics, revascularization, and in-hospital complications

|               | 1-year event-free (95% CI) | Hazard ratio (95% CI) | P value |
|---------------|----------------------------|-----------------------|---------|
| <b>Non-CA</b> | 0.752 (0.749 - 0.754)      | 1                     |         |
| <b>rCA</b>    | 0.784 (0.761 - 0.808)      | 0.86 (0.75 - 0.97)    | 0.0159  |
| <b>ErCA</b>   | 0.782 (0.757 - 0.808)      | 0.86 (0.76 - 0.99)    | 0.0307  |
| <b>LrCA</b>   | 0.821 (0.730 - 0.922)      | 0.69 (0.38 - 1.25)    | 0.2213  |

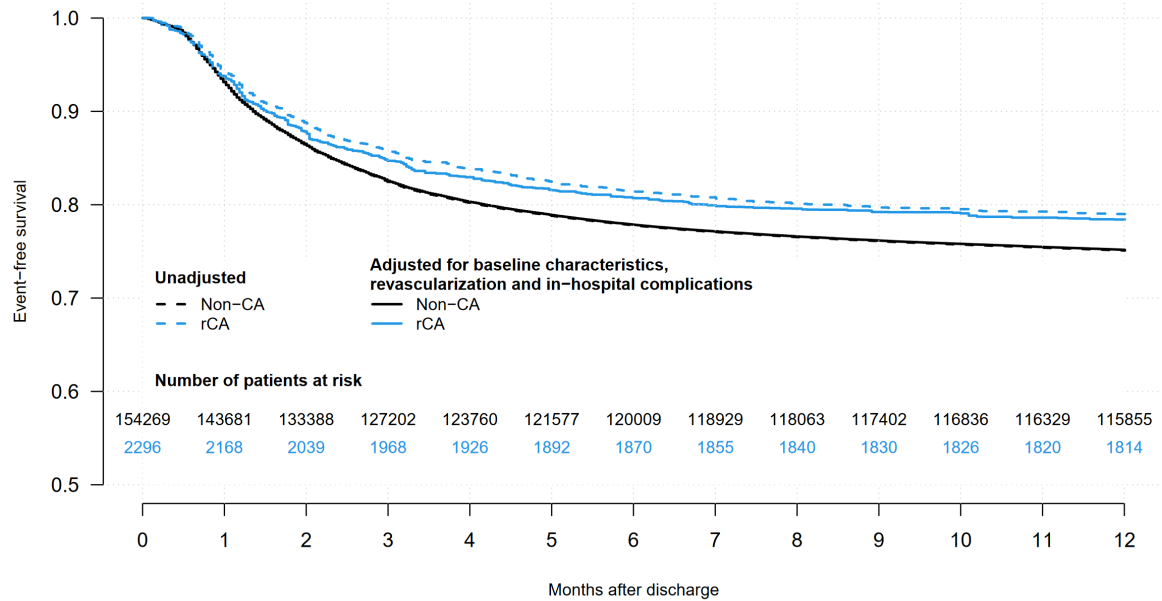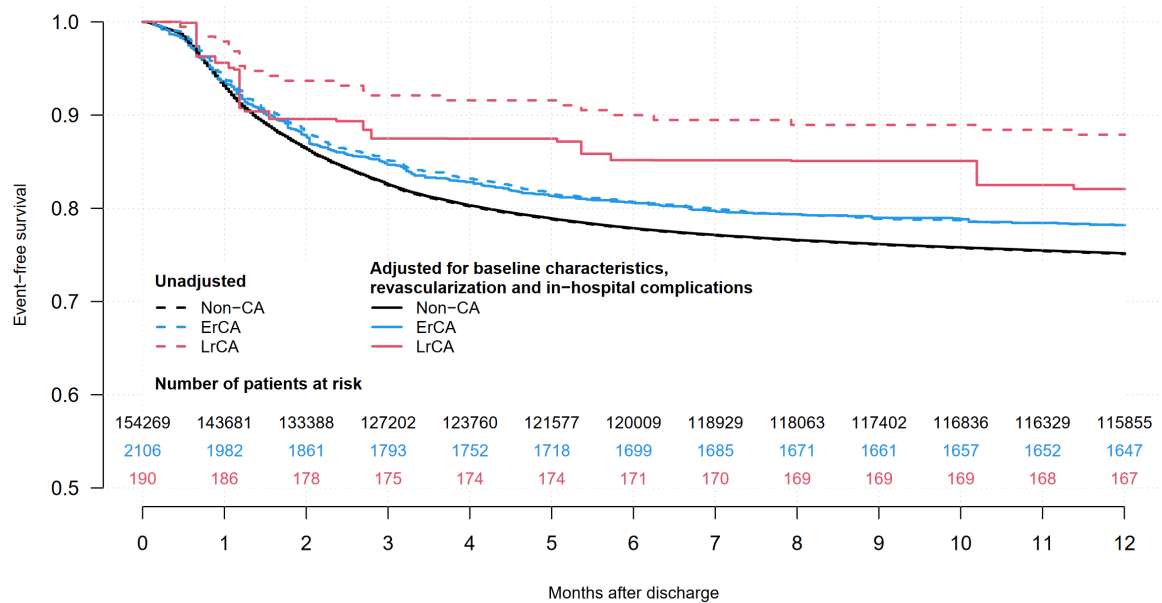

**Adjusted for baseline characteristics, revascularization, in-hospital complications, and treatment procedures**

|               | 1-year event-free (95% CI) | Hazard ratio (95% CI) | P value |
|---------------|----------------------------|-----------------------|---------|
| <b>Non-CA</b> | 0.752 (0.750 – 0.754)      | 1                     |         |
| <b>rCA</b>    | 0.779 (0.755 - 0.804)      | 0.88 (0.77 – 1.00)    | 0.0492  |
| <b>ErCA</b>   | 0.778 (0.752 - 0.804)      | 0.89 (0.78 – 1.01)    | 0.0743  |
| <b>LrCA</b>   | 0.803 (0.702 – 0.918)      | 0.76 (0.42 – 1.40)    | 0.3805  |

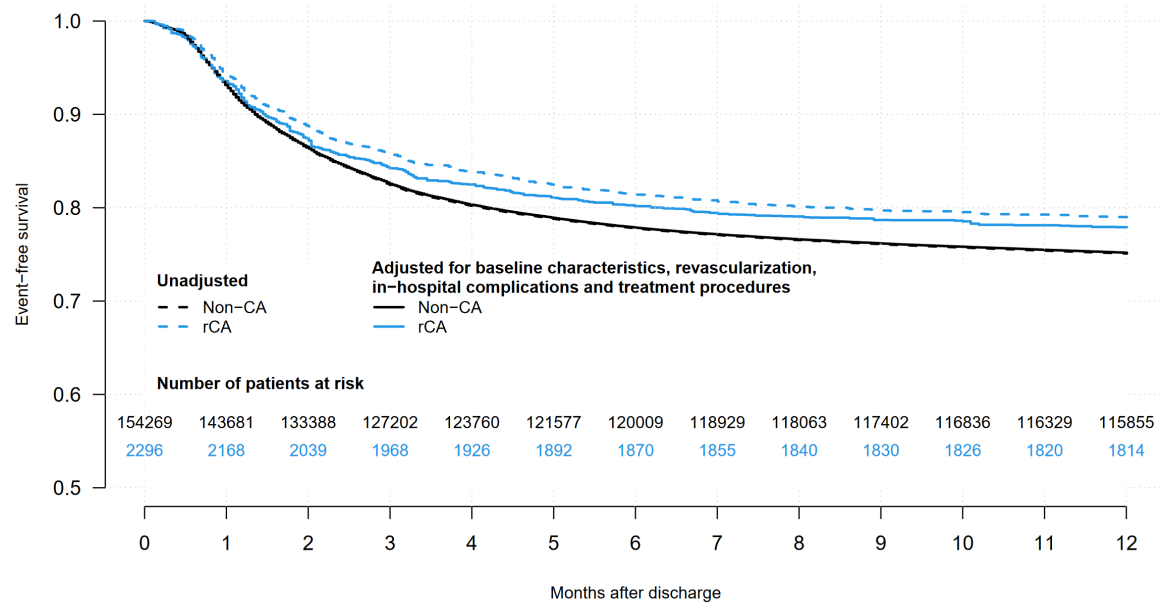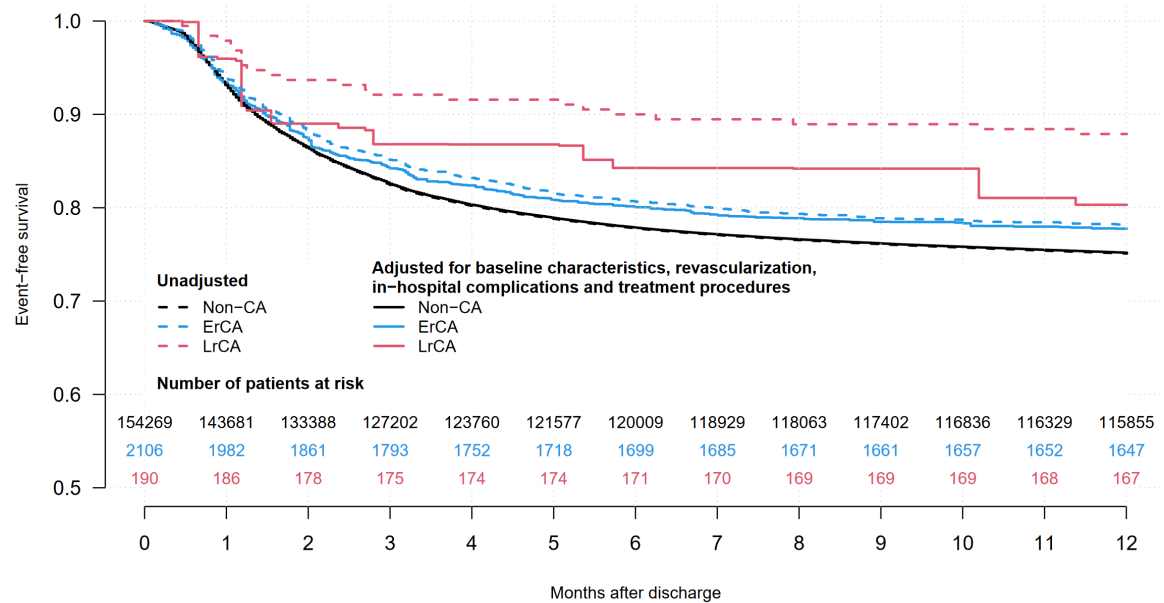

### Relative risk of 1-year re-hospitalization with PCI and CABG

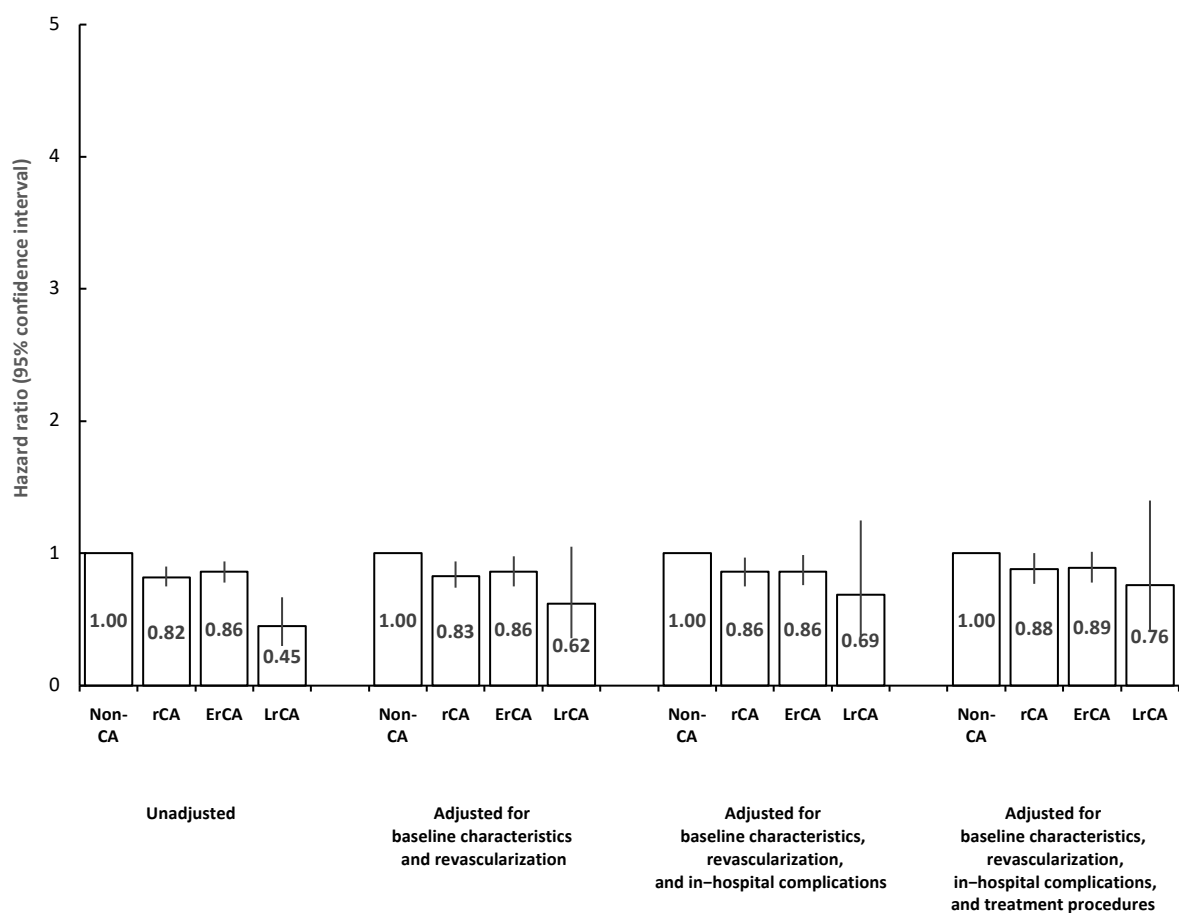

CA – cardiac arrest; rCA – resuscitated cardiac arrest; ErCA – early resuscitated cardiac arrest; LrCA – late resuscitated cardiac arrest

## K) 1 year re-hospitalization with ICD or CRT-D implantation

### Unadjusted

|               | 1-year event-free (95% CI) | Hazard ratio (95% CI) | P value |
|---------------|----------------------------|-----------------------|---------|
| <b>Non-CA</b> | 0.983 (0.983 - 0.984)      | 1                     |         |
| <b>rCA</b>    | 0.951 (0.942 - 0.960)      | 3.04 (2.52 – 3.67)    | <0.0001 |
| <b>ErCA</b>   | 0.952 (0.943 - 0.961)      | 2.96 (2.42 – 3.61)    | <0.0001 |
| <b>LrCA</b>   | 0.937 (0.903 – 0.972)      | 3.98 (2.26 – 7.02)    | <0.0001 |

CI – confidence interval; CA – cardiac arrest; rCA – resuscitated cardiac arrest; ErCA – early resuscitated cardiac arrest; LrCA – late resuscitated cardiac arrest

### Adjusted for baseline characteristics and revascularization

|               | 1-year event-free (95% CI) | Hazard ratio (95% CI) | P value |
|---------------|----------------------------|-----------------------|---------|
| <b>Non-CA</b> | 0.983 (0.983 - 0.984)      | 1                     |         |
| <b>rCA</b>    | 0.967 (0.958 - 0.975)      | 2.01 (1.54 – 2.63)    | <0.0001 |
| <b>ErCA</b>   | 0.967 (0.957 - 0.976)      | 2.01 (1.51 – 2.67)    | <0.0001 |
| <b>LrCA</b>   | 0.933 (0.872 – 0.998)      | 4.15 (1.57 – 11.05)   | 0.00445 |

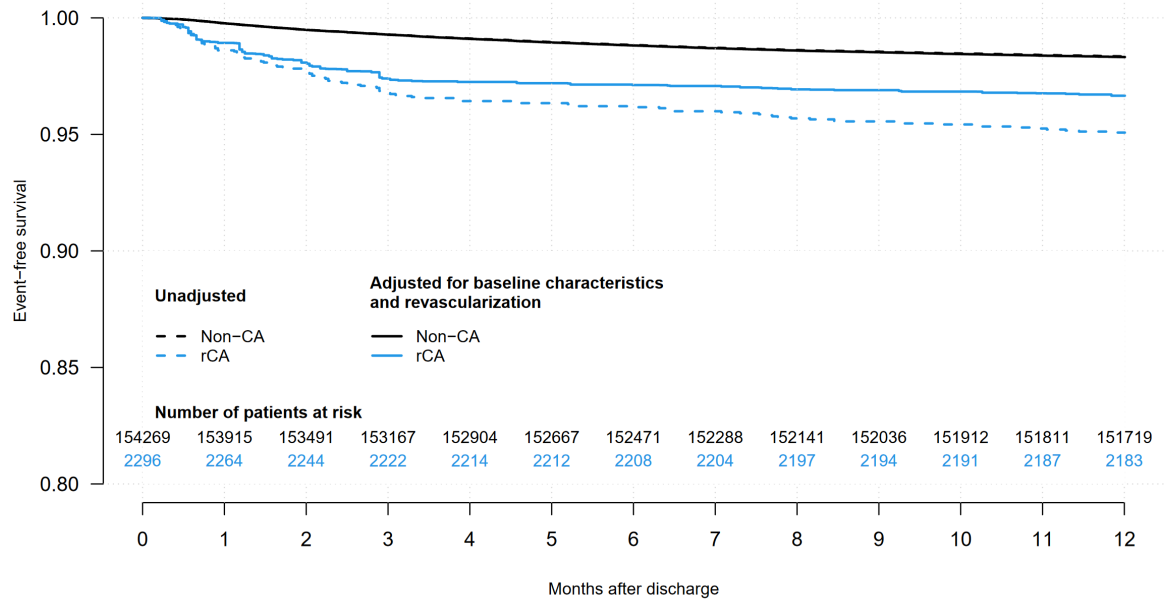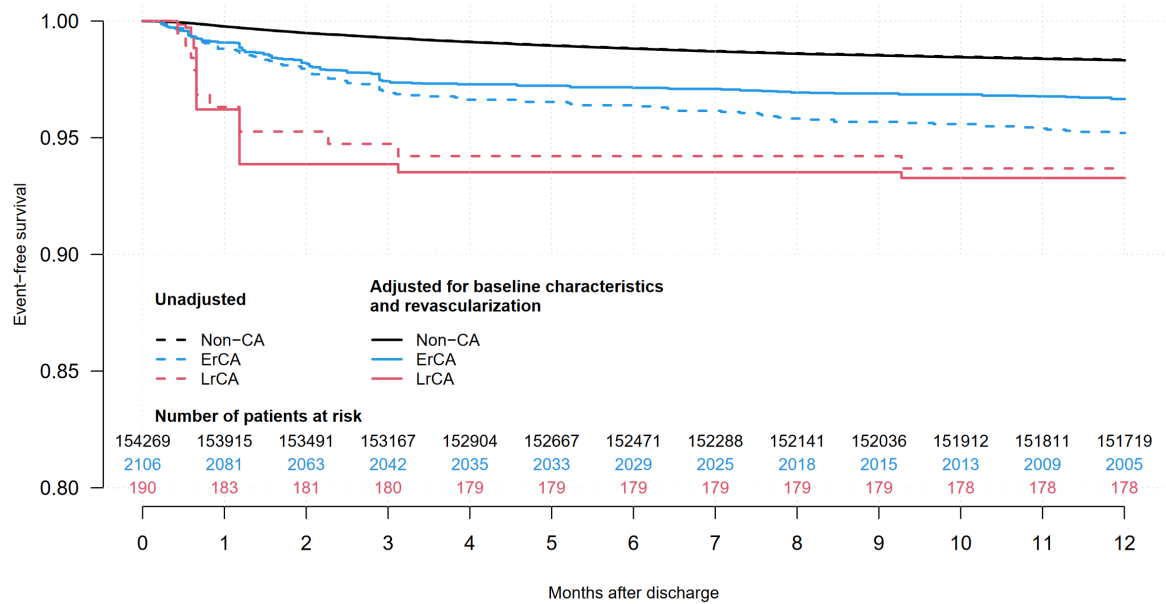

# Adjusted for baseline characteristics, revascularization, and in-hospital complications

|        | 1-year event-free (95% CI) | Hazard ratio (95% CI) | P value |
|--------|----------------------------|-----------------------|---------|
| Non-CA | 0.983 (0.982 - 0.984)      | 1                     |         |
| rCA    | 0.965 (0.955 - 0.975)      | 2.09 (1.57 – 2.79)    | <0.0001 |
| ErCA   | 0.965 (0.954 - 0.975)      | 2.10 (1.55 – 2.84)    | <0.0001 |
| LrCA   | 0.927 (0.861 – 0.997)      | 4.50 (2.22 – 11.86)   | 0.00243 |

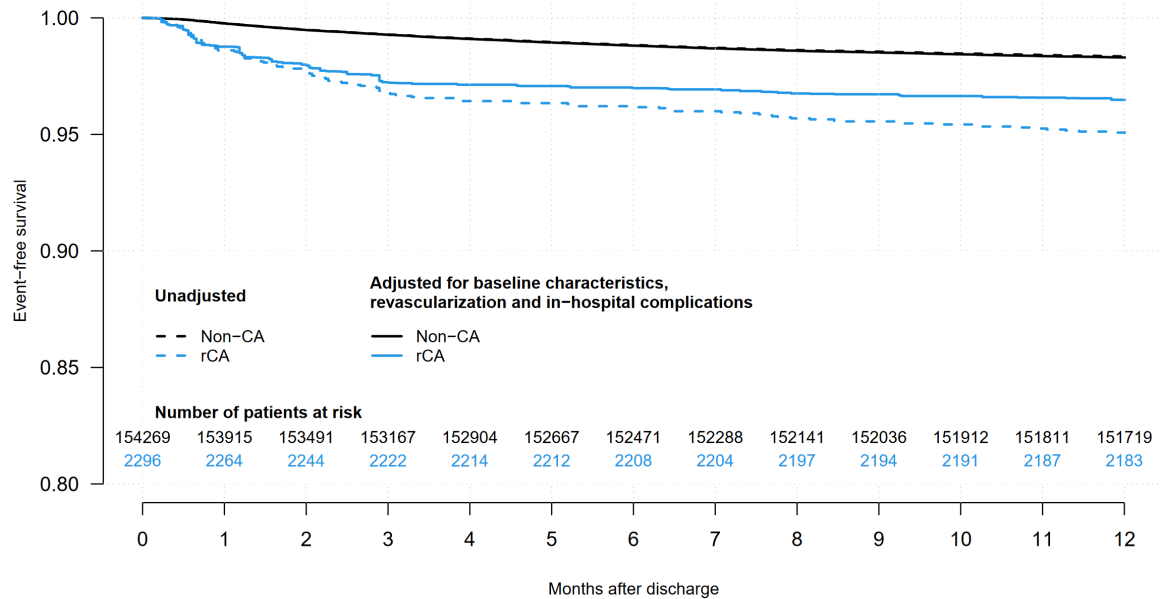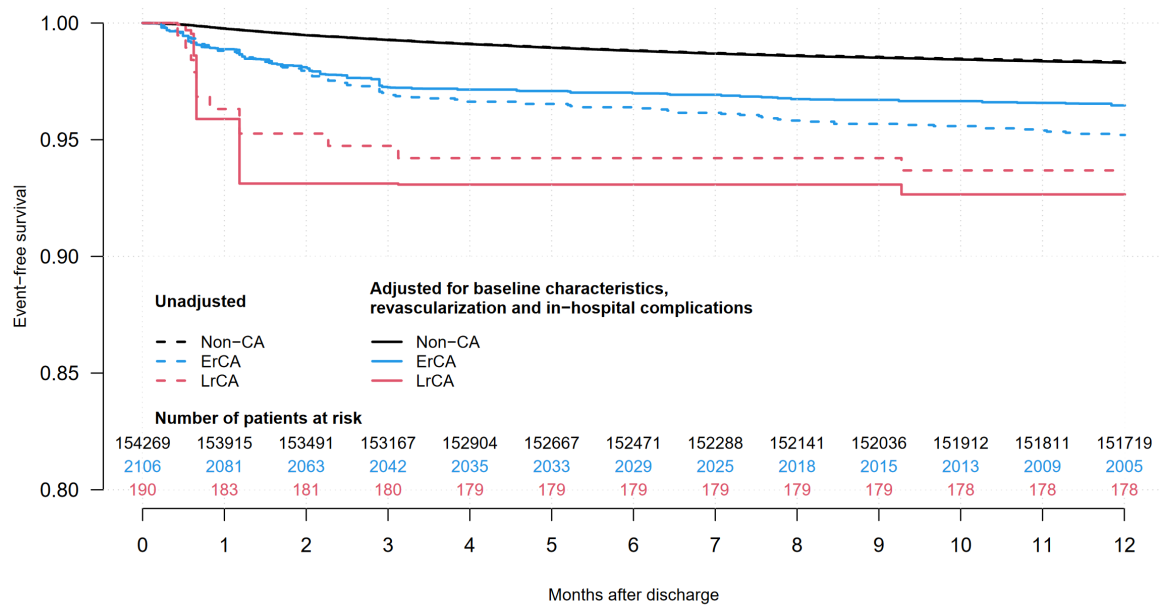

**Adjusted for baseline characteristics, revascularization, in-hospital complications, and treatment procedures**

|               | 1-year event-free (95% CI) | Hazard ratio (95% CI) | P value  |
|---------------|----------------------------|-----------------------|----------|
| <b>Non-CA</b> | 0.983 (0.982 – 0.984)      | 1                     |          |
| <b>rCA</b>    | 0.962 (0.951 - 0.972)      | 2.28 (1.71 – 3.04)    | <0.0001  |
| <b>ErCA</b>   | 0.962 (0.951 - 0.974)      | 2.23 (1.65 – 3.03)    | <0.0001  |
| <b>LrCA</b>   | 0.911 (0.836 – 0.992)      | 5.50 (2.19 – 13.83)   | 0.000295 |

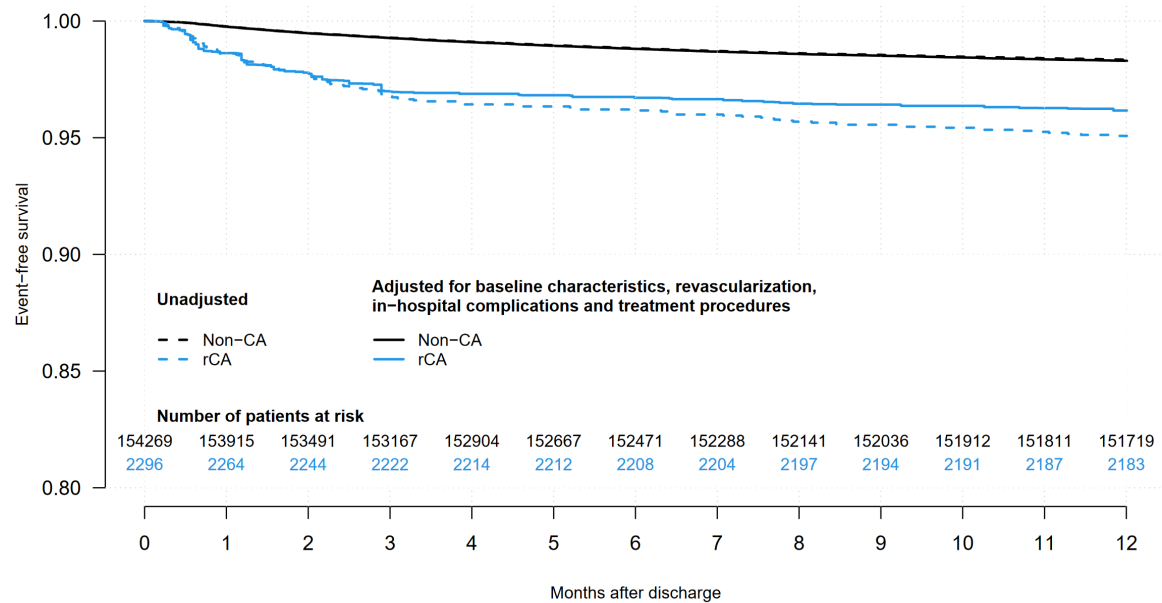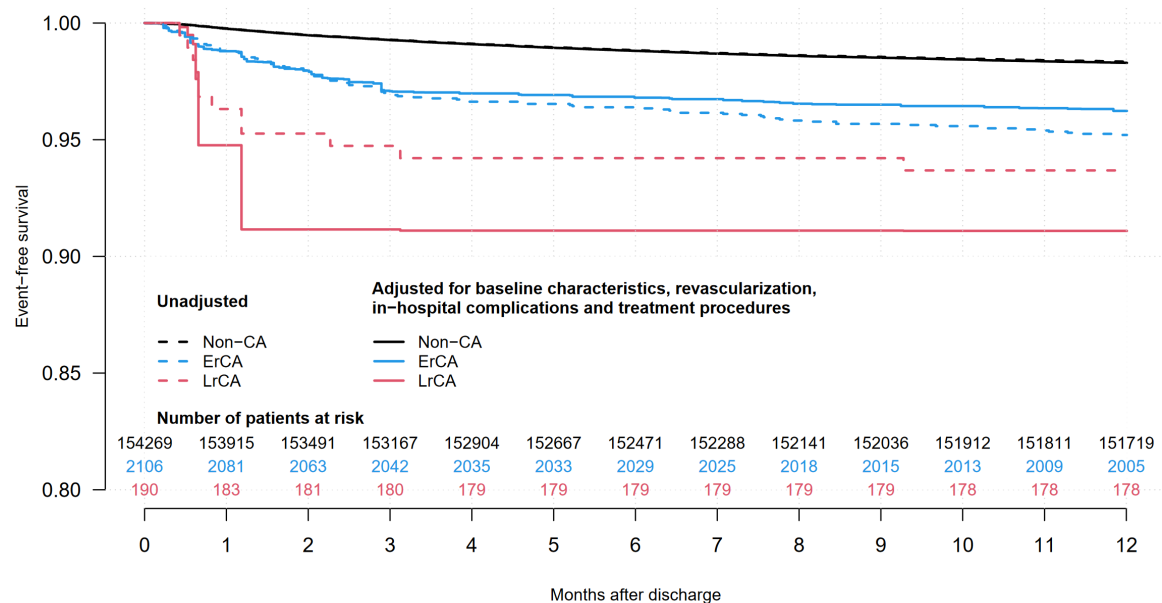



### Relative risk of 1-year re-hospitalization with ICD or CRT-D implantation

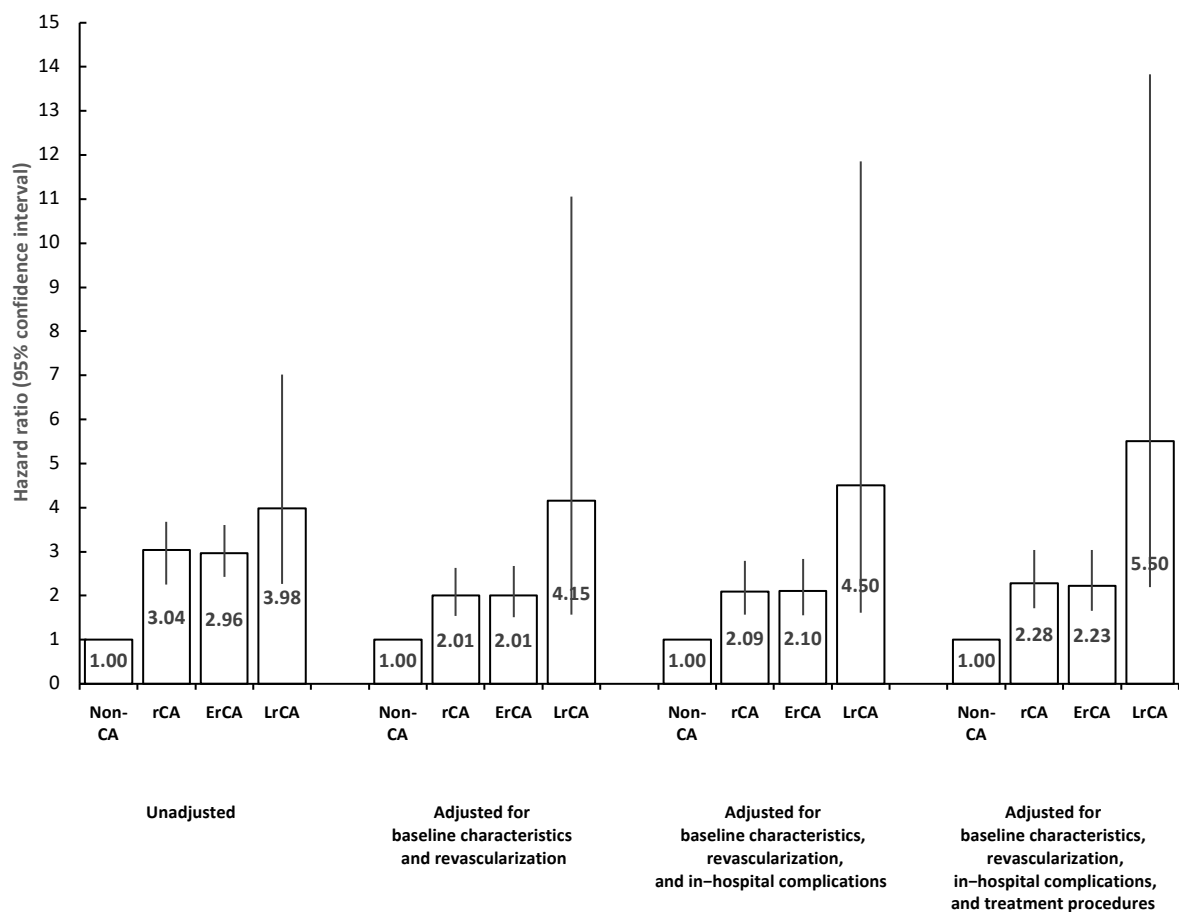

CA – cardiac arrest; rCA – resuscitated cardiac arrest; ErCA – early resuscitated cardiac arrest; LrCA – late resuscitated cardiac arrest
